# Supplementary material for: On the implications of aerosol liquid water and phase separation for organic aerosol mass
Source: Copernicus journal article supplement (doi:10.5194/acp-2016-719), 2016-08-16
Supplement: Supplementary file 1 [file acp-2016-719-supplement.pdf]

1  
2  
3  
4  
5  
6  
7  
8  
9  
10

Supporting information for:  
On the implications of aerosol liquid water and phase separation for modeled organic aerosol mass

H. O. T. Pye et al.  
pye.havala@epa.gov

Supporting information contains: 12 pages  
6 tables  
3 figures

11 OM/OC and O:C Unit Conversions

12

13 *Separation RH*

14 Separation RH (fraction, 0–1) as a function of molar O:C for ammonium sulfate (NH<sub>4</sub>)<sub>2</sub>SO<sub>4</sub> is (You et al.,  
15 2013):

16

$$17 \quad \text{SRH} = 1 / ( 1 + \exp( ( \text{O:C} - 0.68 ) / 0.10 ) ) \quad (\text{S1})$$

18

19 Neglecting the 5 polymer samples (polypropylene glycol, ethylene glycol containing):

20

$$21 \quad \text{OM/OC} = 1.3013 \times \text{O:C} + 1.1663 \quad (\text{S2})$$

22

23 The r<sup>2</sup> for OM/OC vs. O:C in equation S2 is 0.99.

24

25 *Kappa (κ)*

26 Original Lambe et al. (2011) fit:

$$27 \quad \kappa_{\text{org}} = (0.18 \pm 0.04) \times \text{O:C}_{\text{old}} + 0.03 \quad (\text{S3})$$

28

29 Following Canagaratna et al. (2015), the O:C ratios obtained from AMS instruments are increased 27% to  
30 account for a low bias in old calibrations (Canagaratna et al., 2015):

$$31 \quad \text{O:C} = 1.27 \times \text{O:C}_{\text{old}} \quad (\text{S4})$$

32 Thus:

$$33 \quad \kappa_{\text{org}} = 0.14 \times \text{O:C} + 0.03 \quad (\text{S5})$$

34

35 The relationship between kappa and O:C (improved-ambient) are recast in terms of OM/OC (improved-  
36 ambient) using the AMS relationship (Canagaratna et al., 2015):

37

$$38 \quad \text{OM/OC} = 1.29 \times \text{O:C} + 1.17 \quad (\text{S6})$$

39

40 As a result, Lambe et al. 2011 becomes

41

$$42 \quad \kappa_{\text{org}} = 0.11 \times \text{OM/OC} - 0.10 \quad (\text{S7})$$

43

44 For  $\kappa_{\text{org}} = 0.37 \times \text{O:C}_{\text{old}} - 0.09$  (fit based on Jimenez et al. (2009), Raatikainen et al. (2010), and Duplissy  
45 et al. (2011)):

46

$$47 \quad \kappa_{\text{org}} = 0.23 \times \text{OM/OC} - 0.35 \quad (\text{S8})$$

48

49 *Other*

50 When OM/OC needs to be related to O:C and AMS data or a specific molecular structure is not directly  
51 involved, we use Simon and Bhawe (2012) equation S1 assuming only H, C, and O atoms:

52

$$53 \quad \text{O:C} = 12/15(\text{OM/OC}) - 14/15 \quad (\text{S9})$$

54

55 Equivalently,

56

$$57 \quad \text{OM/OC} = 1.25 \times \text{O:C} + 1.17 \quad (\text{S10})$$

58

59 Which results in OM/OC that agree with the improved-ambient AMS relationship (Canagaratna et al.,  
60 2015) within 2%.

61 Table S1: New deposition surrogates

| Species | Henry's Law Coefficient (M/atm) | Diffusivity (cm <sup>2</sup> /s) | Relative reactivity | f0 (meso parameter from Wesely) | Lebas molar volume (cm <sup>3</sup> /mol) |
|---------|---------------------------------|----------------------------------|---------------------|---------------------------------|-------------------------------------------|
| IEPOX   | IEPOX (3x10 <sup>7</sup> )      | 0.0579                           | 8                   | 0                               | 110.8                                     |
| HACET   | HACET (2.93x10 <sup>3</sup> )   | 0.106 (Nguyen et al., 2015)      | 8                   | 0                               | 72.6                                      |

62  
63 Table S2: Revised deposition species

| Species  | Old dry deposition surrogate | Old wet deposition surrogate                   | New dry deposition surrogate | New wet deposition surrogate                 |
|----------|------------------------------|------------------------------------------------|------------------------------|----------------------------------------------|
| NISOPOOH | H2O2                         | H2O2                                           | NTRM                         | HYDROXY_NITRATES (1.7x10 <sup>4</sup> M/atm) |
| HPALD    | none                         | none                                           | OP                           | hydroxy_peroxide (8.3x10 <sup>4</sup> M/atm) |
| ISOPOOH  | OP                           | HYDROXY_PEROXIDE (H=7.4x10 <sup>3</sup> M/atm) | IEPOX                        | no change                                    |

64  
65 Table S3: Revised surrogate properties

| Species                           | Property                | Old Value                 | New Value                 | Reference                 |
|-----------------------------------|-------------------------|---------------------------|---------------------------|---------------------------|
| PROPNN                            | Henry's Law Coefficient | 1x10 <sup>3</sup> M/atm   | 1x10 <sup>4</sup> M/atm   | Nguyen et al. (2015)      |
| H2O2                              | Henry's Law             | 8.3x10 <sup>4</sup> M/atm | 1.1x10 <sup>5</sup> M/atm | Sander (1999)             |
| H2O2                              | Relative reactivity     | 30                        | 34,000                    | Nguyen et al. (2015)      |
| HYDROXY_NITRATES, PROPNN, ORG_NTR | f0 (meso parameter)     | 0.1                       | 0                         | Nguyen et al. (2015)      |
| OP                                | f0 (meso parameter)     | 0.1                       | 0.3                       | Wolfe and Thornton (2011) |

66  
67 Table S4: Observed and modeled organic aerosol concentrations at SOAS CTR. Values used in Figure 1.  
68 WSOC is converted to organic aerosol using an OM/OC of 2.1.

| Species          | Model or Observation? | Value [μg/m <sup>3</sup> ] |
|------------------|-----------------------|----------------------------|
| POA              | Observation           | 0.47                       |
| POA              | Model                 | 0.84                       |
| Water soluble OA | Observation           | 1.993x2.1                  |
| Aqueous SOA      | Model                 | 0.362x2.1                  |
| Total OA         | Observation           | 5.44                       |
| Total OA         | Model                 | 3.58                       |

69  
70

71 Table S5: Domain-wide deposition (in percent) of semivolatiles by phase (gas, aerosol) and type (dry,  
 72 wet) for each volatility class and overall. Values used in Figure 5.  
 73

|              | C* < 0.1<br>μg/m <sup>3</sup> | C* = 0.1<br>μg/m <sup>3</sup> | C* = 1<br>μg/m <sup>3</sup> | C* = 10<br>μg/m <sup>3</sup> | C* = 100<br>μg/m <sup>3</sup> | Overall:<br>Base<br>Simulation | Overall:<br>Updated<br>Simulation |
|--------------|-------------------------------|-------------------------------|-----------------------------|------------------------------|-------------------------------|--------------------------------|-----------------------------------|
| Dry, Aerosol | 3.7                           | 2.8                           | 1.6                         | 0.2                          | 0.02                          | 0.8                            | 0.8                               |
| Wet, Aerosol | 96.3                          | 63.4                          | 34.5                        | 4.5                          | 0.7                           | 21.6                           | 20.8                              |
| Dry, Gas     | 0                             | 13.5                          | 28.6                        | 43.6                         | 39.1                          | 27.2                           | 32.2                              |
| Wet, Gas     | 0                             | 20.4                          | 35.2                        | 51.7                         | 60.2                          | 50.3                           | 46.2                              |

74

75 Table S6: *A posteriori* properties at 298K used in  $\gamma \neq 1$  simulation. MTNO3 Henry's law coefficient was  
 76 increased by 100x compared to *a priori* estimates (Table 2). Activity coefficients at infinite dilution were  
 77 decreased by 10x compared to Table 2 resulting in a decrease in  $C_H^*$  of 10x. Values different from *a priori*  
 78 estimates are shaded grey.  
 79

| species | $C_0^*$<br>$\mu\text{g}/\text{m}^3$ | H<br>M/atm | OM/OC<br>g/g | $\tilde{M}$<br>g/mol | nC<br>- | Dg<br>$\text{cm}^2/\text{s}$ | $V_{\text{Lebas}}$<br>$\text{cm}^3/\text{mol}$ | $\kappa$<br>- | $C_H^*$<br>$\mu\text{g}/\text{m}^3$ | $\gamma^\circ$<br>- |
|---------|-------------------------------------|------------|--------------|----------------------|---------|------------------------------|------------------------------------------------|---------------|-------------------------------------|---------------------|
| ALK1    | 0.1472                              | 6.2E+08    | 1.56         | 225                  | 12      | 0.0514                       | 280.5                                          | 0.07          | 83                                  | 565                 |
| ALK2    | 51.8775                             | 4.5E+06    | 1.42         | 205.1                | 12      | 0.0546                       | 275.6                                          | 0.06          | 10446                               | 201                 |
| BNZ1    | 0.302                               | 2.1E+08    | 2.68         | 161                  | 5       | 0.0642                       | 134.1                                          | 0.19          | 175                                 | 579                 |
| BNZ2    | 111.11                              | 2.0E+06    | 2.23         | 134                  | 5       | 0.0726                       | 127.5                                          | 0.15          | 15476                               | 139                 |
| BNZ3    | 0.01                                | NA         | 3            | 180                  | 5       | 0.0596                       | 138.1                                          | 0.23          | NA                                  | NA                  |
| DIM     | 0.01                                | NA         | 2.07         | 248.2                | 10      | 0.0481                       | 248.1                                          | 0.13          | NA                                  | NA                  |
| GLY     | 0.01                                | NA         | 2.13         | 66.4                 | 3       | 0.1159                       | 64.9                                           | 0.13          | NA                                  | NA                  |
| IEOS    | 0.01                                | NA         | 3.6          | 216.2                | 5       | 0.0527                       | 147.8                                          | 0.3           | NA                                  | NA                  |
| IETET   | 0.01                                | NA         | 2.27         | 136.2                | 5       | 0.0718                       | 127.1                                          | 0.15          | NA                                  | NA                  |
| IMGA    | 0.01                                | NA         | 2.5          | 120.1                | 4       | 0.0781                       | 105                                            | 0.18          | NA                                  | NA                  |
| IMOS    | 0.01                                | NA         | 4.17         | 200.2                | 4       | 0.0555                       | 130.3                                          | 0.36          | NA                                  | NA                  |
| ISO1    | 116.01                              | 4.3E+07    | 2.2          | 132                  | 5       | 0.0733                       | 126.3                                          | 0.14          | 695                                 | 6                   |
| ISO2    | 0.617                               | 3.7E+09    | 2.23         | 133                  | 5       | 0.0729                       | 123.8                                          | 0.15          | 8                                   | 13                  |
| ISO3    | 0.01                                | NA         | 2.8          | 168.2                | 5       | 0.0624                       | 135.9                                          | 0.21          | NA                                  | NA                  |
| ISOPNN  | 8.9                                 | 4.5E+08    | 3.8          | 226                  | 5       | 0.0512                       | 151.9                                          | 0.32          | 114                                 | 13                  |
| MTHYD   | 0.01                                | NA         | 1.54         | 185                  | 10      | 0.0585                       | 233.8                                          | 0.07          | NA                                  | NA                  |
| MTNO3   | 12                                  | 1.5E+08    | 1.9          | 231                  | 10      | 0.0505                       | 248.8                                          | 0.11          | 350                                 | 29                  |
| OLGA    | 0.01                                | NA         | 2.5          | 206                  | 7       | 0.0545                       | 168.2                                          | 0.18          | NA                                  | NA                  |
| OLGB    | 0.01                                | NA         | 2.1          | 248                  | 10      | 0.0481                       | 234.8                                          | 0.13          | NA                                  | NA                  |
| ORGC    | 0.01                                | NA         | 2            | 177                  | 7       | 0.0603                       | 180.3                                          | 0.12          | NA                                  | NA                  |
| PAH1    | 1.6598                              | 5.1E+07    | 1.63         | 195.6                | 10      | 0.0564                       | 235.7                                          | 0.08          | 876                                 | 528                 |
| PAH2    | 264.6675                            | 7.2E+05    | 1.49         | 178.7                | 10      | 0.0599                       | 231.5                                          | 0.06          | 56704                               | 214                 |
| PAH3    | 0.01                                | NA         | 1.77         | 212.2                | 10      | 0.0534                       | 239.8                                          | 0.09          | NA                                  | NA                  |
| SQT     | 24.984                              | 6.2E+08    | 1.52         | 273                  | 15      | 0.0451                       | 346.5                                          | 0.07          | 100                                 | 4                   |
| TOL1    | 2.326                               | 4.2E+07    | 2.26         | 163                  | 6       | 0.0637                       | 153.7                                          | 0.15          | 888                                 | 382                 |
| TOL2    | 21.277                              | 7.3E+06    | 1.82         | 175                  | 8       | 0.0607                       | 194.1                                          | 0.1           | 5477                                | 257                 |
| TOL3    | 0.01                                | NA         | 2.7          | 194                  | 6       | 0.0567                       | 159                                            | 0.2           | NA                                  | NA                  |
| TRP1    | 14.792                              | 9.9E+08    | 1.84         | 177                  | 8       | 0.0603                       | 194.9                                          | 0.1           | 41                                  | 3                   |
| TRP2    | 133.7297                            | 1.4E+08    | 1.83         | 198                  | 9       | 0.0559                       | 218.8                                          | 0.1           | 329                                 | 2                   |
| XYL1    | 1.314                               | 6.2E+07    | 2.42         | 174                  | 6       | 0.061                        | 154.6                                          | 0.17          | 641                                 | 488                 |
| XYL2    | 34.483                              | 4.0E+06    | 1.93         | 185                  | 8       | 0.0585                       | 194.6                                          | 0.11          | 10597                               | 307                 |
| XYL3    | 0.01                                | NA         | 2.3          | 218                  | 8       | 0.0525                       | 194.1                                          | 0.15          | NA                                  | NA                  |

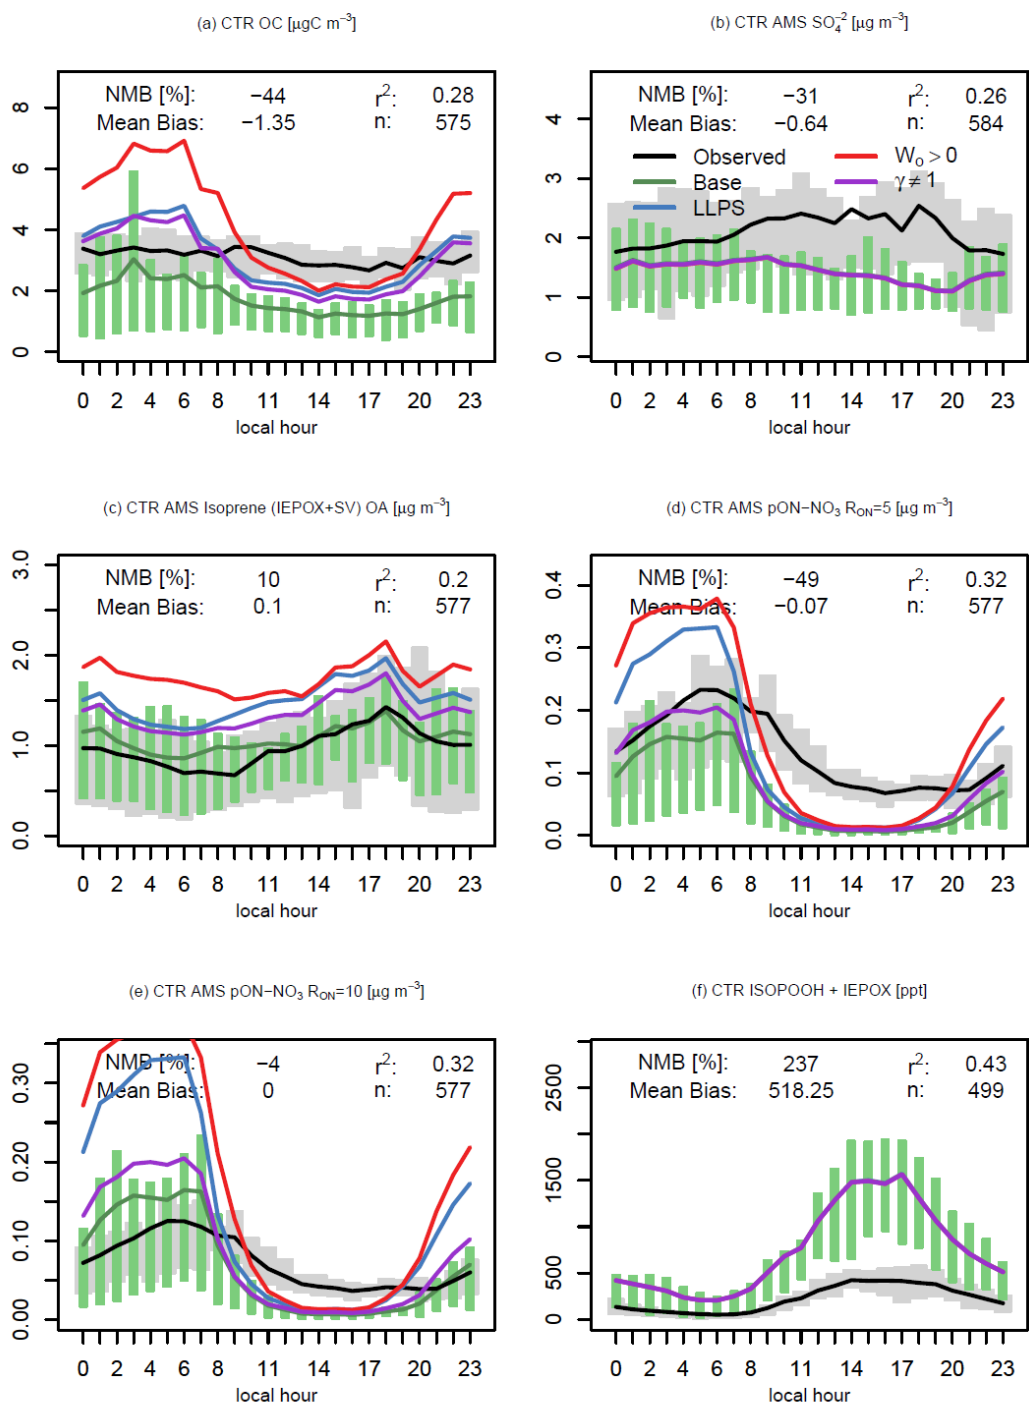

81  
 82 Figure S1: Diurnal variation in modeled and observed species during SOAS. CTR AMS data is from  
 83 Georgia Tech (Xu et al., 2015). CTR ISOPOOH+IEPOX data is from the CIT-ToF-CIMS (Nguyen et al.,  
 84 2015). CTR particle-phase tetrol data is from the SV-TAG instrument (Isaacman et al. 2014). Isoprene is  
 85 from the PTR-MS (Misztal et al. in preparation). OH is from the GTHOS (Feiner et al., 2016). LRK AMS  
 86 data is from Budisulistiorini et al. (2015). Mean bias, normalized mean bias (NMB), and  $r^2$  refer to the  
 87 base simulation and observations. Colored lines represent different model simulation predictions. Vertical  
 88 bars represent interquartile range.

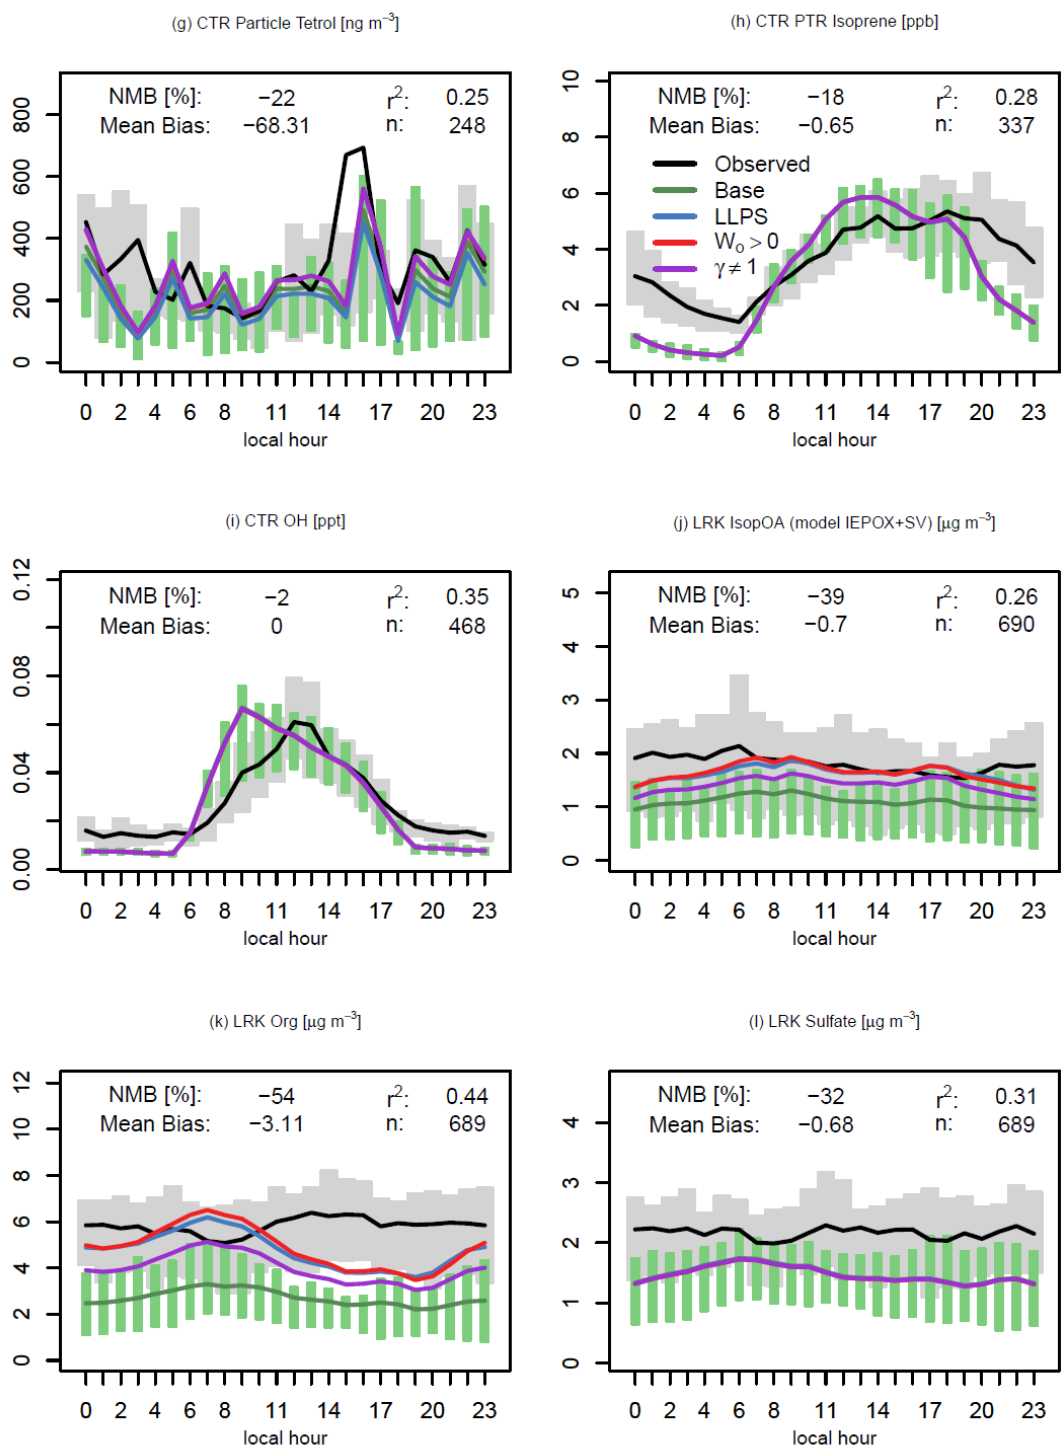

89  
 90 Figure S1 continued

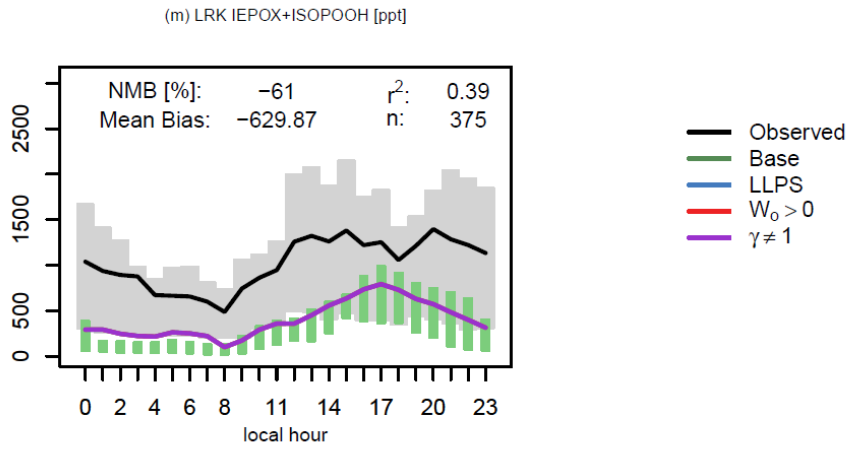

91  
92 Figure S1 continued



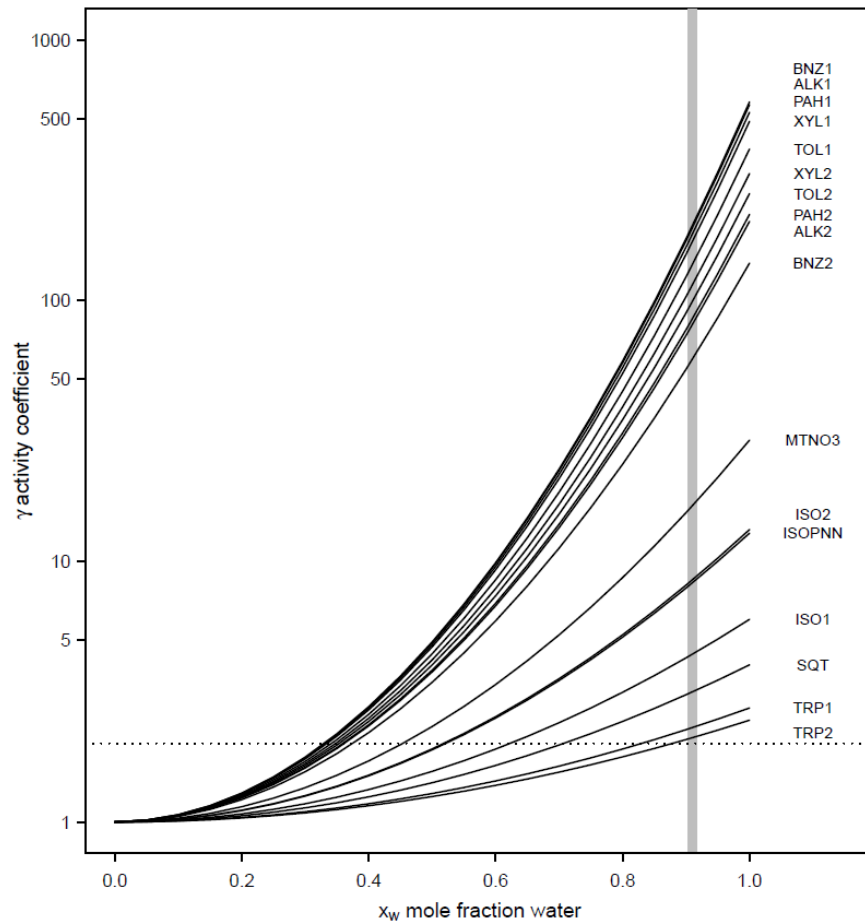

93  
94

95 Figure S2: Activity coefficients ( $\gamma \neq 1$  simulation) for semivolatile organics as a function of mole fraction  
 96 water in the particle at 298 K. Dotted line indicates  $\gamma = 2$  which would result in a factor of 2 increase in  
 97 the saturation concentration. The vertical grey line indicates the average mole fraction of water in the  
 98 particle estimated from SOAS observations (0.91). The MTNO3 Henry's law coefficient has been  
 99 increased by a factor of 100 compared to *a priori* assumptions. Activity coefficients at infinite dilution  
 100 ( $x_w = 1$ ) have been reduced by a factor of 10 compared to *a priori* assumptions.

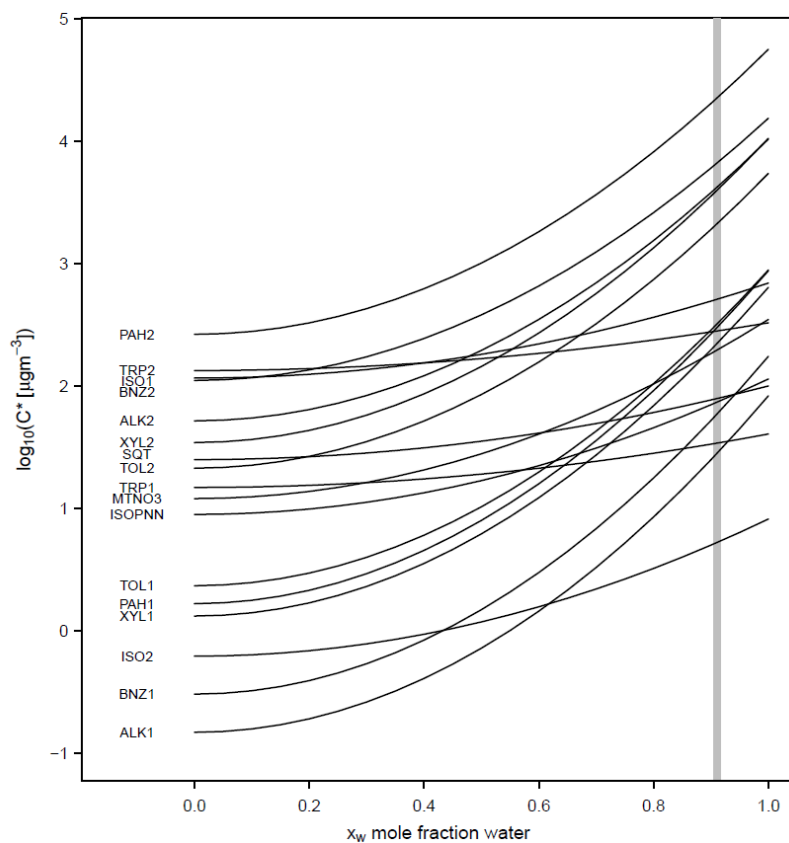

101  
 102  
 103  
 104  
 105  
 106  
 107

Figure S3: Saturation concentration ( $C_i^*$ ) as a function of aerosol water mole fraction at 298 K. The vertical grey line indicates the average mole fraction of water in the particle estimated from SOAS observations (0.91). The MTNO3 Henry's law coefficient has been increased by a factor of 100 compared to *a priori* assumptions. Activity coefficients at infinite dilution ( $x_w = 1$ ) have been reduced by a factor of 10 compared to *a priori* assumptions.

## 108 REFERENCES

109  
110 Budisulistiorini, S. H., Li, X., Bairai, S. T., Renfro, J., Liu, Y., Liu, Y. J., McKinney, K. A., Martin, S. T.,  
111 McNeill, V. F., Pye, H. O. T., Nenes, A., Neff, M. E., Stone, E. A., Mueller, S., Knote, C., Shaw, S. L.,  
112 Zhang, Z., Gold, A., and Surratt, J. D.: Examining the effects of anthropogenic emissions on isoprene-  
113 derived secondary organic aerosol formation during the 2013 Southern Oxidant and Aerosol Study  
114 (SOAS) at the Look Rock, Tennessee ground site, *Atmos. Chem. Phys.*, 15, 8871–8888, doi:10.5194/acp-  
115 15-8871-2015, 2015.

116  
117 Canagaratna, M. R., Jimenez, J. L., Kroll, J. H., Chen, Q., Kessler, S. H., Massoli, P., Hildebrandt Ruiz,  
118 L., Fortner, E., Williams, L. R., Wilson, K. R., Surratt, J. D., Donahue, N.M., Jayne, J. T., and Worsnop,  
119 D. R.: Elemental ratio measurements of organic compounds using aerosol mass spectrometry:  
120 characterization, improved calibration, and implications, *Atmos. Chem. Phys.*, 15, 253–272,  
121 doi:10.5194/acp-15-253-2015, 2015.

122  
123 Duplissy, J., DeCarlo, P. F., Dommen, J., Alfarra, M. R., Metzger, A., Barmapadimos, I., Prevot, A. S. H.,  
124 Weingartner, E., Tritscher, T., Gysel, M., Aiken, A. C., Jimenez, J. L., Canagaratna, M. R., Worsnop, D.  
125 R., Collins, D. R., Tomlinson, J., and Baltensperger, U.: Relating hygroscopicity and composition of  
126 organic aerosol particulate matter, *Atmos. Chem. Phys.*, 11, 1155–1165, doi:10.5194/acp-11-1155-2011,  
127 2011.

128  
129 Feiner, P. A. W. H. Brune, D. O. Miller, L. Zhang, R. C. Cohen, P. S. Romer, A. H. Goldstein, F. N.  
130 Keutsch, K. M. Skog, P. O. Wennberg, T. Nguyen, A. P. Teng, J. DeGouw, A. Koss, R. J. Wild, S. S.  
131 Brown, A. Guenther, E. Edgerton, K. Baumann, J. L. Fry, Testing atmospheric oxidation in an Alabama  
132 forest, submitted to *J. Atmos. Sci.*

133  
134 Isaacman, G., N.M. Kreisberg, L.D. Yee, D.R. Worton, A.W.H. Chan, J.A. Moss, S.V. Hering, and A.H.  
135 Goldstein, Online derivatization for hourly measurements of gas- and particle-phase semi-volatile  
136 oxygenated organic compounds by thermal desorption aerosol gas chromatography (SV-TAG), *Atmos.*  
137 *Meas. Tech.*, 7, 4417-4429, doi:10.5194/amt-7-4417-2014, 2014.

138  
139 Jimenez, J. L., Canagaratna, M. R., Donahue, N. M., Prevot, A. S. H., Zhang, Q., Kroll, J. H., DeCarlo, P.  
140 F., Allan, J. D., Coe, H., Ng, N. L., Aiken, A. C., Docherty, K. S., Ulbrich, I. M., Grieshop, A. P.,  
141 Robinson, A. L., Duplissy, J., Smith, J. D., Wilson, K. R., Lanz, V. A., Hueglin, C., Sun, Y. L., Tian, J.,  
142 Laaksonen, A., Raatikainen, T., Rautiainen, J., Vaattovaara, P., Ehn, M., Kulmala, M., Tomlinson, J. M.,  
143 Collins, D. R., Cubison, M. J., Dunlea, J., Huffman, J. A., Onasch, T. B., Alfarra, M. R., Williams, P. I.,  
144 Bower, K., Kondo, Y., Schneider, J., Drewnick, F., Borrmann, S., Weimer, S., Demerjian, K., Salcedo,  
145 D., Cottrell, L., Griffin, R., Takami, A., Miyoshi, T., Hatakeyama, S., Shimono, A., Sun, J. Y., Zhang, Y.  
146 M., Dzepina, K., Kimmel, J. R., Sueper, D., Jayne, J. T., Herndon, S. C., Trimborn, A. M., Williams, L.  
147 R., Wood, E. C., Middlebrook, A. M., Kolb, C. E., Baltensperger, U., and Worsnop, D. R.: Evolution of  
148 Organic Aerosols in the Atmosphere, *Science*, 326, 1525–1529, doi:10.1126/science.1180353, 2009.

149  
150 Lambe, A. T., Onasch, T. B., Massoli, P., Croasdale, D. R., Wright, J. P., Ahern, A. T., Williams, L. R.,  
151 Worsnop, D. R., Brune, W. H., and Davidovits, P.: Laboratory studies of the chemical composition and  
152 cloud condensation nuclei (CCN) activity of secondary organic aerosol (SOA) and oxidized primary  
153 organic aerosol (OPOA), *Atmos. Chem. Phys.*, 11, 8913–8928, doi:10.5194/acp-11-8913-2011, 2011.

154  
155 Misztal, P. K., Guenther, A., and Goldstein, A. H.: Flux observations of isoprene oxidation products  
156 above forests point to potential role of leaf-surface reactions, in preparation, 2016.

157

158 Nguyen, T. B., Crounse, J. D., Teng, A. P., St. Clair, J. M., Paulot, F., Wolfe, G. M., and Wennberg, P.  
159 O.: Rapid deposition of oxidized biogenic compounds to a temperate forest, *Proc. Natl. Acad. Sci. U. S.*  
160 *A.*, 112, E392–E401, doi:10.1073/pnas.1418702112, 2015.

161

162 Raatikainen, T., Vaattovaara, P., Tiitta, P., Miettinen, P., Rautiainen, J., Ehn, M., Kulmala, M.,  
163 Laaksonen, A., and Worsnop, D. R.: Physicochemical properties and origin of organic groups detected in  
164 boreal forest using an aerosol mass spectrometer, *Atmos. Chem. Phys.*, 10, 2063–2077, doi:10.5194/acp-  
165 10-2063-2010, 2010.

166

167 Sander R.: *Compilation of Henry’s Law Constants for Inorganic and Organic Species of Potential*  
168 *Importance in Environmental Chemistry* (Max Planck Inst Chem, Mainz, Germany). [http://www.henry-  
170 law.org/henry-3.0.pdf](http://www.henry-<br/>169 law.org/henry-3.0.pdf), 1999.

171

172 Simon, H. and Bhawe, P. V.: Simulating the degree of oxidation in atmospheric organic particles,  
173 *Environ. Sci. Technol.*, 46, 331–9, 2012.

174

175 You, Y., Renbaum-Wolff, L., and Bertram, A. K.: Liquid-liquid phase separation in particles containing  
176 organics mixed with ammonium sulfate, ammonium bisulfate, ammonium nitrate or sodium chloride,  
177 *Atmos. Chem. Phys.*, 13, 11 723–11 734, doi:10.5194/acp-13-11723-2013, 2013.

178

179 Wolfe, G. M., and Thornton, J. A.: The Chemistry of Atmosphere-Forest Exchange (CAFE) Model – Part  
180 1: Model description and characterization. *Atmos. Chem. Phys.* 11, 1, 77-101, 2011.

181

182 Xu, L., Guo, H., Boyd, C. M., Klein, M., Bougiatioti, A., Cerully, K. M., Hite, J. R., Isaacman-VanWertz,  
183 G., Kreisberg, N. M., Knote, C., Olson, K., Koss, A., Goldstein, A. H., Hering, S. V., de Gouw, J.,  
184 Baumann, K., Lee, S.-H., Nenes, A., Weber, R. J., and Ng, N. L.: Effects of anthropogenic emissions on  
185 aerosol formation from isoprene and monoterpenes in the southeastern United States, *Proc. Natl. Acad.*  
*Sci. U. S. A.*, 112, 37–42, doi:10.1073/pnas.1417609112, 2015.
