# Supplementary material for: On the implications of aerosol liquid water and phase separation for organic aerosol mass
Source: Copernicus journal article supplement (doi:10.5194/acp-2016-719), 2016-08-16
Supplement: Supplementary file [file acp-2016-719-AC2-supplement.pdf]

“On the implications of aerosol liquid water and phase separation for organic aerosol mass”  
by Havala O. T. Pye et al.

## Response to reviewer #2

We thank reviewer #2 for their comments, editorial corrections, and overall recommendation for publication after comments have been addressed. Our responses are in blue with new text added to the manuscript underlined.

### Review Pye et al., 2016

This study uses the regional chemical transport model CMAQ to predict the organic aerosol loading and water uptake over the eastern United States and compares the model simulations with observations from monitoring networks. A parameterization of the water uptake by the organic fraction of the aerosol particles is introduced, which should account for the positive feedback of water uptake triggering additional partitioning of semivolatile species to the particulate matter. Simulations relying on different parameterization of water uptake are compared with each other and with observations. It is found that the loading and water uptake of organic aerosol is sensitive to aerosol water interactions with semivolatile organic aerosol species. From too low to too high aerosol mass is predicted depending on how the water uptake is parameterized.

The subject of this study is timely and important. Knowledge of the physical properties of the organic aerosol is increasing, rendering a more physical representation in models feasible. While this paper goes into the right direction, there are inadequacies in the way the water uptake is parameterized. Most importantly, the water uptake in the case of liquid-liquid phase separation (LLPS) is unrealistic because it assumes that in the absence of LLPS the water associated with the inorganic ions is available for partitioning of organic species, while the water uptake of the organics themselves and solution non-ideality are neglected. However, LLPS results from solution non-ideality. The assumptions for the simulation LLPS are therefore inconsistent and insinuate a wrong perception of LLPS, which might lead to confusion. While it makes sense to use the formula by You et al. (2013) to estimate how frequently LLPS in the eastern US occurs (as shown in Fig. 10), the water uptake in the presence of LLPS cannot be calculated the way it is done in the manuscript. This simulation should therefore be removed. Zuend and Seinfeld (2012) have shown that in the case of LLPS, it suffices to assume that the phase separation into an organic and inorganic phase is complete, however, when organics and inorganic constituents are present in the same phase, activity coefficients accounting for interactions between organic and inorganic species should not be neglected as is done in all simulations presented here. Nevertheless, this study goes into the right direction and highlights the need to include solution non-idealities for further model improvements. I therefore recommend this paper for publication in ACP after the following comments have been addressed.

For the LLPS simulation, water uptake is calculated using ISORROPIA II, which is also used to calculate aerosol water in standard CMAQ. Given that inorganic and organic constituents likely mix in the ambient atmosphere (Figure 10b), even the base model is inaccurate in its representation of aerosol water as it neglects water uptake onto organic constituents and inorganic-organic interactions that would affect water associated with inorganic constituents. LLPS and the base simulation underestimate aerosol liquid water (Figure 11e).

One can argue that, although LLPS is caused by nonidealities (i.e., high activity coefficients), once the phases have separated (or come together), the constituents in each are in a relatively favorable state and could behave in their respective phase in an "ideal" way - and in equilibrium across phases. By using the work of You et al. 2013 for predicting when LLPS occurs, we start with a phase state that is relatively favorable before calculating partitioning.

The LLPS simulation is a hybrid of empirical (to represent the phase separation based on OM/OC and RH) and theoretical (specifically ideal Raoult's law) representations of the influence of inorganic water on SOA. To emphasize that the LLPS simulation is meant to separate the effect of "inorganic water" from "organic water" we have renamed it "ideal Wi." Ideal Wi is meant to demonstrate the effects of including water in the partitioning medium for organics without accounting for deviations in ideality which is a useful reference case upon which to build in the future. Some rephrasing is implemented throughout the manuscript to emphasize what is captured by "ideal Wi" (see track changes).

#### General comment:

It is difficult to find orientation in the manuscript. Some information is scattered, some is incomplete and some seems to be missing. Many different parameters are used. Their meanings are only given once when they are introduced and it is difficult to find this position again. A table listing all abbreviations would therefore be helpful. Also, some parameters and expressions are not used consistently throughout the manuscript (see specific comments). There is quite a bit of supporting information provided, but only partly referenced in the main text, which makes it hard to make use of it. The text in the figure captions is difficult to follow and needs to be improved.

To provide more guidance to the reader, we have revised the last paragraph of the introduction to refer to all second level headings. In addition, the section outlining simulations to be performed has been moved earlier in the manuscript (to section 2.1) to give an overview and outline of the article. Although section 2.7 is listed before 2.6 in the introduction, we kept the order as-is in the manuscript since we wanted to introduce the modified Raoult's law before discussing deviations in ideality. See track changes.

Supporting information was meant to provide additional information for those with interest in specific topics such as model evaluation and description. We do not want the reader to consider the supporting information as mandatory reading but as optional reading, so references to it are kept at a minimum.

See responses to specific comments below. The caption to table 2 now provides one location where many parameters are defined.

#### Specific comments:

Page 6, line 12 and 13: the exponent of the equation does not seem to be correct: should it be "63,000(298K-T)/298K"? Please correct.

The equation is correct.  $H = 4.1 \times 10^3 \exp(63,000(298-T)/(298T))$  is the Van't Hoff equation (see Raventos-Duran et al. 2010 equation 2: <http://www.atmos-chem-phys.net/10/7643/2010/acp-10-7643-2010.pdf>). The coefficient 63,000 corresponds to the enthalpy of solvation (J/mol) divided by the universal gas constant (J/molK) and thus has units of K. We added the K units to the equation:

$$H = 4.1 \times 10^3 \exp(63,000 \text{K}(298-T)/(298T))$$

Page 6, line 18: was the accuracy for Henry's law coefficients determined for dilute solutions or for concentrated solutions as present in aerosol particles? The authors should comment on the accuracy of Henry's law coefficients applied to concentrated solutions using equation (20) and compare it to the accuracy reached by direct use of activity coefficients given by  $\gamma$ .

GROMHE Henry's law coefficients are for dilute solutions, and thus evaluation of the Henry's law coefficient by comparison with other models (HenryWin, etc) neglects the influence of inorganic salts which may increase (salting in) or decrease (salting out) the Henry's law coefficient compared to pure water. The following modifications were made:

GROMHE was found to reproduce Henry's Law coefficients for organic-water systems with mean absolute error of about 0.3 log units compared to 0.5 for HenryWin and 0.4 for SPARCv4.2 (Raventos-Duran et al., 2010).

Although the relationship between H and  $C^*_i$  was relatively robust, variability in H spanned many orders of magnitude for a given  $C^*_i$  bin without considering how inorganic species may modify the Henry's law coefficient.

To get an idea of how Henry's law may be modified in the presence of organics, we refer readers to Figure S2-S3 which show activity coefficients and  $C^*$  as a function of mole fraction water.

Page 8, equation (9): how is  $D_{core}$  determined?

An equation for  $D_{core}$  is now available right after equation 8. Text after equation 8 indicates  $D_{core}$  is the volume equivalent accumulation mode diameter excluding water associated with organic species. Notation in old equation 10 (now 11) was updated for consistency. New/updated equations:

$$D_{core} = \left( \frac{6}{\pi} \sum_{i \neq W_o} V_i \right)^{1/3}$$
$$\kappa = \frac{\sum_{i \neq W_o} (\kappa_i V_i)}{\sum_{i \neq W_o} (V_i)}$$

Page 9 line 2: what is meant by "mole-based"? Activity coefficients of organics are usually mole fraction based.

Not all activity coefficients currently used in atmospheric science are mole based. Activity coefficients introduced for the volatility basis set (VBS) are molality based (See Supplemental Material section 5.1 of Donahue et al. 2006 ES&T: <http://pubs.acs.org/doi/full/10.1021/es052297c>). In addition, ISORROPIA-II uses molal-based activity coefficients (Kusik-Meisner for binary solutions and Bromley's method for multicomponent). We are emphasizing that activity coefficients in this work are mole based.

Page 9, line 15 and 16: "Inclusion of water, and even inorganic constituents, in the absorbing phase has been encouraged for simplified models in order to reproduce more detailed calculations (Zuend et al., 2010)." Yes, but at the same time also solution non-ideality has to be included, otherwise

water uptake is too high. Zuend and Seinfeld (2012) state in their conclusions: “However, assuming ideality at higher RH (>60 %), will very likely lead to significant overprediction of SOA mass and total PM mass.” This is the case for organic mixtures and even more for mixtures including inorganic salts. Therefore, this sentence cannot be used as a justification for the model assumptions.

We understand the point raised by the reviewer. However, our approach for water uptake, the ZSR correlation used for the inorganic phase for inorganic models (eg ISORROPIA) and “hygroscopicity” for organic systems does not require explicit calculations of water activity. The latter is required of course to PREDICT LLPS, but we do not do that here. Instead, we parameterize LLPS and predict the water uptake for each phase using, effectively, ZSR in each phase separately, which of course is thermodynamically consistent as water activity is consistently equal to RH in all the phases.

See our earlier response regarding the assumptions of the LLPS (now “ideal  $W_i$ ”) simulation. The fact that organics and water are present in one phase is an indication that conditions cannot be that unfavorable. Our “ideal  $W_i$ ” simulation is consistent with the conclusion of Zuend and Seinfeld that assuming ideality at higher RH will lead to overpredictions in SOA and we think it is useful to demonstrate this fact in the context of a regional model compared with field data. Also note that the amount of water in the particle predicted in “ideal  $W_i$ ” is lower than that observed (Figure 10e) and thus water uptake is not too high.

Page 9, line 27: it should be “modified Raoult’s law” (as in Zuend et al., 2010, and Zuend and Seinfeld, 2012) because, strictly, “Raoult’s law” does not include the activity coefficient  $\gamma$ .

We agree and have added the term “modified” before Raoult’s at two locations in the manuscript and added a citation to Seinfeld and Pandis (2006).

Page 10, equation (20): the one-constant Margules equation is applicable to molecules of the same molecular size but different polarity. The molecular size of organic species and water is very different. Have you validated the applicability of this equation to aqueous organic solutions?

The one-constant Margules is a simple model and we have chosen it for this reason. As part of future work, we have begun exploring if ambient partitioning of individual compounds can be described using a Margules model and preliminary results indicate it performs better in terms of capturing variability in particle fraction than ideal partitioning to an organic-only mixture for some species. In the near-future, the constant in the Margules model could potentially be determined empirically via regression as has been done for the volatility of SOA in the Odum 2-product or VBS parameterizations. In addition, we are exploring other models for activity coefficients.

Page 11, line 25: Figure 3 should be explained better, here or in the figure caption. The meaning of the dashed arrow should be given explicitly.

The caption indicates: “The white dashed arrows indicate aqueous SOA interaction with the inorganic phase (via liquid water, acidity, etc).” etc has been replaced with “particle size” in response to a later comment. The figure is illustrative (see later comments about size of pie slices).

Page 11, line 27: as explained in the general comment, the assumptions of the simulation LLPS are unphysical and inconsistent. Therefore, this simulation should be removed. It does not represent the

water uptake of a system with LLPS.

See earlier response regarding LLPS/“ideal  $W_i$ .”

Page 11, line 30: The assumptions of the second simulation should be explained better by referring to the relevant equations.

We now refer back to section 2.5 which contains all the equations used to predict  $W_o$ .

In the second simulation, uptake of water to the organic phase ( $W_o > 0$ ) was predicted based on its OM/OC and k-Köhler theory (Petters and Kreidenweis, 2007) ([Section 2.5](#)).

Page 12, line 3: The meaning of “a posteriori parameters” should be explained better. How were they determined?

A posteriori parameters are introduced in section 2.6 where we state that a priori assumptions resulted in all particulate organic nitrates being driven out of the particle. We performed the following series of simulations until organic nitrates returned to the particle:

| Sensitivity | MTNO3 H-law value [M/atm] | Change in Activity Coefficients | Adequate organic nitrates in particle at SOAS-CTR? |
|-------------|---------------------------|---------------------------------|----------------------------------------------------|
| 0601        | 1.5e6                     | Base                            | No                                                 |
| 0610        | 1.5e7                     | Base                            | No                                                 |
| 0613        | 1.5e8                     | Base                            | No                                                 |
| 0616        | 1.5e8                     | Base/10                         | Yes                                                |

Text has been added:

These adjustments, [determined through a series of sensitivity simulations](#), may have been necessary due to inaccuracies in the Henry's law coefficients, pure species saturation concentrations, molecular weights, Margules model, or a combination of all of the above.

A posteriori parameters used in  $\gamma \neq 1$ , [which include a factor of 100 increase in MTNO3 solubility and factor of 10 decrease in activity coefficients](#), are available in Table S6.

Page 12, line 9 and 10: “The total nonvolatile POA in CMAQ is assumed to correspond to emissions of  $C_i^* \approx 3000 \mu\text{g m}^{-3}$  and lower volatility compounds.” I am not sure whether I understand this sentence correctly. Are emissions with  $C_i^* \approx 3000 \mu\text{g m}^{-3}$  considered as nonvolatile? Please explain.

The National Emissions Inventory does not estimate the volatility of primary organic aerosol (POA), however CMAQ assumes it is nonvolatile. We assume that the model POA corresponds to species with  $C_i^* \approx 3000 \mu\text{g m}^{-3}$  and lower volatility compounds. The assumption that POA corresponds to semivolatile species is only made in post-processing for model evaluation. Revision:

[For estimating observed POA from total OA only](#), ~~The total nonvolatile~~ POA in CMAQ is assumed to correspond to emissions of  $C_i^* \approx 3000 \mu\text{g m}^{-3}$  and lower volatility compounds.

Page 12, line 10 and 11: This sentence should be formulated better.

See previous word removal.

Page 12, equation (27): what is  $\alpha_i$ ?  
Addressed with next comment.

Page 12, line 15: volatility bins are defined from 0 – 1000  $\mu\text{gm}^{-3}$ . What is meant by the 0  $\mu\text{gm}^{-3}$  volatility bin? Really nonvolatile? Moreover, volatility bins do not directly refer to species. This sentence has to be reformulated.

0 indicated nonvolatile for all atmospheric conditions (entirely in particle). The sentence has been reworded.

...where the volatility profile is described by one nonvolatile and  $C_i^* \equiv 0, 1, 10, 100$ , and 1000 surrogate species in the following mass-based abundance ( $\alpha_i$ ): 0.27, 0.15, 0.26, 0.16, and 0.17.

Page 13 and Fig. 4: How is saturation concentration determined in this figure? Is it the one of the pure compound? In this case, it should be labelled with a zero.

It is the pure species saturation concentration (usually from an Odum 2-product fit). Text was updated and the x-axis label updated to include a subscript 0 for pure species:

Figure 4 shows the updated molecular weights as a function of pure species saturation concentration and colored by OM/OC.

Page 13 and Table 2: The chemical structure is not given in the manuscript. Do the species listed in Table 2 have a specific composition or only physical properties? This should be explained better.

Some species have a specific composition while others have reasonable physical properties considering their parent hydrocarbon. Table 1 gives a species name where a specific species is represented. The heading of column 2 in Table 1 was modified from “Production pathway description” to “Species or production pathway description”.

Page 15, line 28: the definition of “NMB” and “mean absolute gross error” etc. should be given in the main manuscript or in the SI.

MB, ME, and NMB formulas are now given in the caption of Figure 7.

**Figure 7.** Aerosol OC, POC, and SOC predicted by the base model simulation ( $M_i$ ) compared to CSN, IMPROVE, and SEARCH (JST, BHM, CTR, and YRK) observations ( $O_i$ ). Mean bias ( $MB = \frac{1}{n} \sum_{i=1}^n (M_i - O_i)$ ) and mean absolute gross error ( $ME = \frac{1}{n} \sum_{i=1}^n |M_i - O_i|$ ) are in  $\mu\text{gCm}^{-3}$ . X symbols indicate mean bias. Boxplots indicate 5th, 25th, median, 75th, and 95th percentile.  $r^2$  based on a zero intercept.  $n$  is the number of observations.  $NMB = \frac{\sum_{i=1}^n (M_i - O_i)}{\sum_{i=1}^n O_i}$ .

Page 16, line 16: I state here my main criticism again: implementing LLPS just by using the LLPS threshold from You et al. (2013) does not make sense. Water associated to ions is not available for partitioning of organics. The LLPS simulation should therefore be removed.

See earlier renaming of LLPS to “ideal  $W_i$ .” The water associated with ions would be available for partitioning if one homogeneous phase existed in the particle (ie  $SRH < RH$ ).

Page 16, lines 30 – 33: “Generally, all aerosol water is expected to evaporate in an aerodynamic lens inlet used on many instruments (Zelenyuk et al., 2006), which can cause changes in the aerosol phase state (Pajunoja et al., 2016) and could potentially lead to changes in partitioning of soluble organic compounds.” Could this be the reason for the absence of the diurnal cycle in the observations? This would be an interesting point to discuss.

Co-located hourly SEARCH measurements of OC (Figure S1), which do not use aerodynamic lenses, show a similar lack of strong diurnal variation as the AMS. Thus it is unlikely that the diurnal variation was affected by the AMS lens. Biases of course are always possible and e.g., SEARCH measurements use a thermal-optical method to separate OC from EC and may be subject to their own artifacts.

While water can be lost in the aerodynamic lens, any organic species that are partitioned to the aerosol due to volatility will have vapor pressures at least 5 orders of magnitude lower. Evaporation rate is proportional to vapor pressure, and since water evaporates at a rate of  $\sim 10^4$  monolayers  $s^{-1}$ , semivolatile species can be estimated to evaporate at a rate of 0.1 monolayers  $s^{-1}$ , or 0.001 monolayers in the 10 ms residence time in the AMS aerodynamic lens. This is consistent with the widely-observed lack of evaporation of ammonium nitrate, a semivolatile species, in the AMS lens (Canagaratna et al., 2007). If the aerosol would transition to a glassy state during rapid water evaporation, vapor pressure of organics would overall be reduced by orders of magnitude, which tends to mitigate volatilization biases.

If the ambient is much colder than the instrument operation temperature, the heating can increase vapor pressure enough (even if the aerosol is glassy) and perhaps promote volatilization biases. This situation was infrequent during SOAS, when most instruments were located in air-conditioned trailers ( $\sim 20$ - $25^\circ\text{C}$ ) at temperatures similar or often lower than ambient. For the infrequent conditions in which trailers were warmer than ambient air, we can use information from the literature to provide a constraint on this possible effect. Guo et al. (2016) estimated whether volatilization biases associated with measurements ammonium nitrate (a soluble and highly semivolatile species) were present under aircraft operation during the WINTER campaign (when the air sampled was  $15$ - $40^\circ\text{C}$  colder than the instrumentation in the cabin of the aircraft).  $\text{NO}_3$  concentrations, as measured by a PILS and an AMS as well as thermodynamic partitioning calculations indicate volatilization biases were not present - in the AMS aerodynamic lens as well. Many organic species have low volatility (e.g. Cappa and Jimenez, 2010). For organic species that are comparable to  $\text{NO}_3$  (semivolatile, soluble in water, and with high molecular diffusivity) we would not expect issues in the measurements for the reasons described above.

A related issue, however, is that organic compounds with very high vapor pressures (approaching that of water) and water solubility. We have added/revised the following text to address this point:

Some caution should be applied when comparing model predictions and observations. Measurements of total aerosol mass from IMPROVE and CSN networks are made under relative humidities of 30-50\% and quartz filters for OC analysis from IMPROVE may be subject to ambient conditions in the field and during shipping before analysis (Solomon et al. 2014). Exposure to low RH could cause evaporation of reversible aqueous SOA (El-Sayed et al. 2016). Kim et al. (2015) have ~~indicated~~ reported the IMPROVE measurements of OC were 27% lower than colocated SEARCH measurements during the summer of 2013, and hypothesized the difference to be due to evaporation from the IMPROVE filters, during and after sampling artifacts. Episodic field campaign observations may be subject to sampling biases as well. Dryers are used ahead of many online aerosol chemistry instruments, and ~~Generally all~~ most



aerosol water is expected to evaporate in an aerodynamic lens inlet used on many instruments (Zelenyuk et al. 2006; Matthew et al., 2009). Such drying ~~which~~ can cause changes in the aerosol phase state (Pajunoja et al. 2016) and could potentially lead to changes in partitioning of soluble organic compounds. El-Sayed et al. (2016) have reported a loss of WSOC after drying. Those authors used a post-drying residence time of 7 s, which is much longer than those used post-drying for the AMS in SOAS (~1 s) and the time in the aerodynamic lens (~0.01 s). A prior study reported that evaporation of ammonium nitrate, a water soluble and semivolatile species, was not observed when using post-drying residence times of ~1 s (Guo et al., 2016). While this topic should be subject to additional research, the AMS data in SOAS is unlikely to have significant biases due to this effect.

Page 17, Figure 10: Figure 10 should be shown also when the LLPS simulations is removed. The prediction of the occurrence of LLPS from You et al. (2013) is based on RH information and shows how relevant LLPS is in the eastern US.

We have kept figure 10 as it shows useful information on the frequency of time particles are present as one-phase vs 2-phases. The prediction of that occurrence is empirical as estimated by You et al. and is not strongly influenced by the different sensitivity simulations (their only influence would be through changes in the OM/OC which are not very large, Figure 11c). The caption has been reworded to go along with the new characterization of the LLPS simulation as “ideal Wi.” The LLPS/ideal Wi simulations did consider information in Figure 10.

Page 17, lines 4 – 7 and 20 – 23: As stated before, water uptake and semivolatile organic gas-particle partitioning including LLPS can only be modeled realistically when activity coefficients between organics and inorganic ions are included.

See earlier responses regarding “ideal Wi.” We have removed the text indicating LLPS is a lower bound on the effect of inorganic water on semivolatile OA.

~~The LLPS simulation represents a lower bound on the effect of inorganic water on the partitioning medium for OA.~~

Page 20, lines 9 and 10: it should be explicitly stated what precursors are meant.

Revised:

Figure 14 shows observed water soluble organic carbon compounds in the gas phase (WSOC<sub>g</sub>, measured by Mist Chamber and Total Carbon Analyzer Hennigan et al. 2009) compared to (a) semivolatile SOA precursors (i.e. those associated with dry organic aerosol in Table 1) and (b) semivolatile and aqueous SOA precursors currently in CMAQ.

Page 20, line 27: what do the numbers refer to? To the different simulations or the different observations?

Numbers refer to different observations (networks). The single simulation name is now included for clarification:



A method ( $\gamma \neq 1$  simulation) was developed to take into account deviations from ideality using an activity coefficient calculated based on the species Henry's law coefficient, pure species saturation concentration ... and mole fraction water in the particle that resulted in a normalized mean bias of -4%, -10%, and -2% for IMPROVE, CSN, and SEARCH SOC.

Page 21, lines 14 to 15: Is the second conclusion referring to the simulation  $Wo > 1$ ? This simulation led to the largest overprediction of OA and LWC in Fig. 11! How can this be considered as the best choice?

It refers to the fact that OM/OC is providing some indication of kappas (Figure 11c-d). While there is still progress to be made, neglecting water associated with organics (see Figure 11e) is wrong with implications for any process influenced by particle size (deposition, light scattering, etc).

Figure 1: this figure caption is confusing and needs improvement. The categories are not explained properly. What is "insoluble"? Can you tell how it is derived maybe by referring to an equation? The expression "other SOA" is only used in Fig. 1. Is it the same as "dry organic aerosol" from Table 2? What is "aq. SOA"? The same as "aqueous aerosol" in Table 2 or does it also include cloud water from Table 2? According to Fig. 2, there seem to be two POA species (POC and NCOM). They are considered as nonvolatile. How does this go along with the sentence: "The total nonvolatile POA in CMAQ is assumed to correspond to emissions of  $Ci^* \approx 3000 \mu\text{gm}^{-3}$  and lower volatility compounds."? This seems to imply that there is also a semivolatile POA. Is POA considered to be insoluble in water? If yes, this would be inconsistent with the water uptake associated with POA as sketched in Fig. 3.

Insoluble is total OA minus  $2.1 \times \text{WSOC}$ . Other SOA is the same as dry organic aerosol in table 2. Aq. SOA is the same as aqueous SOA and was abbreviated to keep the figure sized properly. POA does not take up water in the base simulation (standard CMAQ), but does in the  $Wo > 0$  and nonideal simulation (Figure 3 is correct). See also earlier revision regarding semivolatile POA.

Modifications:

Caption: Contribution of POA (observed biomass burning OA, BBOA, Xu et al. (2015a)), SOA, water-soluble OA (estimated as  $2.1 \times \text{WSOC}$  from the PILS, Sullivan et al. (2004)), and aqueous (aq.) SOA (model only) to total OA during June 2013 observed at CTR during SOAS and modeled by standard CMAQ. Insoluble OA is the difference between measured total OA and water-soluble OA. Modeled "other SOA" is formed via partitioning to a dry organic phase.

Added to Figure 2 caption:

$\text{POA} = \text{POC} + \text{NCOM}$ .

Figure 2: the meaning of dashed and solid arrows should be stated explicitly.

All arrows are now solid.

Figure 3: Are the pie-charts intended to represent the contributions of the different categories to the total particulate matter realistically? Is "PvapSOA" in Fig. 3 the same as "dry organic aerosol" in Table 2? What is meant by interaction via acidity? What is hidden within the "etc"?

The relative sizes of the pie slices were determined by using SOAS measured concentrations of sulfate-nitrate-ammonium (inorganic phase), BBOA (POA), WSOM (aqueous SOA), and total SOA minus WSOM (Pvap SOA). As we demonstrate in Figure 13 and in the manuscript, measured WSOC (or WSOM) is not strictly a proxy for aqueous SOA. The size of the Pvap vs. aqueous SOA slices may not be correct, and for this reason, we have used the pie figures as illustrative without specifically discussing the magnitudes. The model distribution of POA vs SOA is different than the ambient data as illustrated in Figure 1, thus we didn't want to create pie charts based on model results. There is no atmospheric measure of "dry organic aerosol."

Interaction via acidity indicates the SOA formed from IEPOX which requires acidity. Acidity is estimated via ISORROPIA and thus only considers inorganic contributions to  $H^+$ . The main thing embedded in the "etc" are the ways inorganic species physically interact to determine IEPOX SOA:

- inorganic species influence the volume of accumulation mode aerosol which is used to convert the concentration of acids and nucleophiles in mol/volume-air to mol/volume-particle which is what governs the rate of particle-phase reaction
- inorganic species affect the surface area of accumulation mode aerosol which is used to calculate heterogeneous uptake

These influences were too verbose to discuss in a figure caption; however, we have replaced "etc" with [particle size](#).

Figure 4: The quality of the figure needs to be improved. The labels are on top of each other. Some of the species with large OM/OC are listed as the "dry organic aerosol" that does not seem to be involved in the uptake of water. Is this correct? If yes, why?

"dry organic aerosol" refers to base model assumptions (no water uptake). In  $Wo > 0$  and the nonideal simulation, all organic aerosol takes up water according to its OM/OC. Labels are now separated.

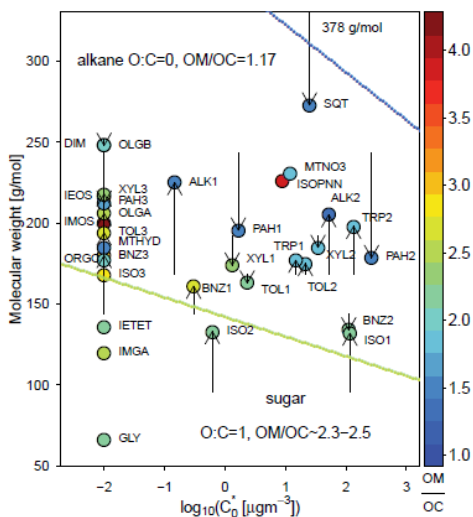

Technical comments:

Figures are not numbered consecutively as they appear in the text: Figure 4 is mentioned on page 5 while Fig. 3 only on page 11. Figures should therefore be reordered.

Figures 1-4 are now in order.

Page 4, line 15: remove first "aerosol"

Removed.

Page 11; line 6: should this sentence read: "...in phase a compared to the total particulate species..."?  
Yes, revised.

Page 12, line 9: "The volatility distribution of gasoline vehicle POA from May et al. (2013) and used by the CMAQ-VBS (Koo et al., 2014) was..." improve formulation.  
Reworded in response to previous comment.

Page 12, line 15: should it be "0.01, 0.1, 1, 10, 100, ..."? Moreover, volatility bins do not directly refer to species. This sentence needs to be reformulated.  
Reworded in response to previous comment.

Page 14, line 6: "...not entirely...": add "be".  
Added.

Page 15, line 20: "The standard deviation (s) in model predicted SOA fraction was much higher at 0.21 vs 0.08 in observations." Improve formulation.  
Sentence replaced with:

The variability in predicted SOA fraction (standard deviation, s, of 0.21) was much higher than the variability in observed SOA fraction (s=0.08).

Page 16, lines 15 and 16: "Figure 9 shows how including water interactions in absorptive partitioning calculations affected model performance compared to routine monitoring networks." Improve formulation.

Figure 9 shows how including water interactions in absorptive partitioning calculations affected model predictions of OC at routine monitoring network locations.  
~~performance compared to routine monitoring networks.~~

Page 17, line 14: "occurred" should be replaced by "is predicted".  
Replaced with was predicted.

Page 17, line 19: the "ed" should be removed from "represented".  
Removed

Table 1: Is aqueous aerosol used synonymous with aqueous SOA? if yes, only one expression should be used.

Aqueous SOA terminology is not used in Table 1. Aqueous SOA would be a subset of aqueous aerosol which would also include inorganic species.

Table 2: all abbreviations should be given in the table caption or a new table with all abbreviations should be added.

All column headings in Table 2 are now defined in the figure caption.

Other updates to manuscript:

- CMAQv5.2-beta is currently available on github. CMAQv5.2 will be fully released in 2017. The data availability section has been updated.

- Appel et al. is now in GMDD (citation updated)
- Feiner et al. 2016 is now published (citation updated)

**New references:**

Guo, H., Sullivan, A.P., Campuzano-Jost, P., Schroder, J.C., Lopez-Hilfiger, F.D., Dibb, J.E., Jimenez, J.L., Thornton, J.A, Brown, S.S., Nenes, A., and Weber, R.J.: Fine particle pH and the partitioning of nitric acid during winter in the northeastern United States, *J. Geophys. Res.*, 121, doi:10.1002/2016JD025311, 2016.

Matthew, B.M., Middlebrook, A.M., and Onasch, T.B.: Collection Efficiencies in an Aerodyne Aerosol Mass Spectrometer as a Function of Particle Phase for Laboratory Generated Aerosols, *Aerosol Science and Technology*, 42(11), 884-898, doi: 10.1080/02786820802356797, 2008.

# On the implications of aerosol liquid water and phase separation for organic aerosol mass

Havala O. T. Pye<sup>1</sup>, Benjamin N. Murphy<sup>1</sup>, Lu Xu<sup>2</sup>, Nga L. Ng<sup>2,3</sup>, Annmarie G. Carlton<sup>4,5</sup>, Hongyu Guo<sup>3</sup>, Rodney Weber<sup>3</sup>, Petros Vasilakos<sup>2</sup>, K. Wyatt Appel<sup>1</sup>, Sri Hapsari Budisulistiorini<sup>6</sup>, Jason D. Surratt<sup>6</sup>, Athanasios Nenes<sup>2,3,7,8</sup>, Weiwei Hu<sup>9,10</sup>, Jose L. Jimenez<sup>9,10</sup>, Gabriel Isaacman-VanWertz<sup>11</sup>, Pawel K. Misztal<sup>11</sup>, and Allen H. Goldstein<sup>11,12</sup>

<sup>1</sup>National Exposure Research Laboratory, US Environmental Protection Agency, Research Triangle Park, NC, USA

<sup>2</sup>School of Chemical and Biomolecular Engineering, Georgia Institute of Technology, Atlanta, GA, USA

<sup>3</sup>School of Earth and Atmospheric Sciences, Georgia Institute of Technology, Atlanta, GA, USA

<sup>4</sup>Department of Environmental Sciences, Rutgers University, New Brunswick, NJ, USA

<sup>5</sup>Now at: Department of Chemistry, University of California, Irvine, CA, USA

<sup>6</sup>Gillings School of Global Public Health, The University of North Carolina at Chapel Hill, Chapel Hill, NC, USA

<sup>7</sup>Institute of Environmental Research and Sustainable Development, National Observatory of Athens, Palea Penteli, GR-15236, Greece

<sup>8</sup>Institute for Chemical Engineering Sciences, Foundation for Research and Technology Hellas, Patras, Greece

<sup>9</sup>Cooperative Institute for Research in Environmental Sciences, University of Colorado, Boulder, CO, USA

<sup>10</sup>Department of Chemistry and Biochemistry, University of Colorado, Boulder, CO, USA

<sup>11</sup>Department of Environmental Science, Policy, and Management, University of California, Berkeley, CA USA

<sup>12</sup>Department of Civil and Environmental Engineering, University of California, Berkeley, CA USA

*Correspondence to:* Havala O. T. Pye (pye.havala@epa.gov)

**Abstract.** Organic compounds and liquid water are major aerosol constituents in the southeast United States (SE US). Water associated with inorganic constituents (inorganic water) can contribute to the partitioning medium for organic aerosol when relative humidities or organic matter to organic carbon (OM/OC) ratios are high such that separation relative humidities (SRH) are below the ambient relative humidity (RH). As OM/OC ratios in the SE US are often between 1.8 and 2.2, organic aerosol experiences both mixing with inorganic water and separation from it. Regional chemical transport model simulations including inorganic water (but excluding water uptake by organic compounds) in the partitioning medium for secondary organic aerosol (SOA) when  $RH > SRH$  led to increased SOA concentrations, particularly at night. Water uptake to the organic phase resulted in even greater SOA concentrations as a result of a positive feedback in which water uptake increased SOA, which further increased aerosol water and organic aerosol. Aerosol properties, such as the OM/OC and hygroscopicity parameter ( $\kappa_{org}$ ), were captured well by the model compared with measurements during the Southern Oxidant and Aerosol Study (SOAS) 2013. Organic nitrates from monoterpene oxidation were predicted to be the least water-soluble semivolatile species in the model, but most biogenically-derived semivolatile species in the CMAQ model were highly water soluble, and expected to contribute to water soluble organic carbon (WSOC). Organic aerosol and SOA precursors were abundant at night; but, additional improvements in daytime organic aerosol are needed to close the model-measurement gap. By taking into account deviations from ideality, including both inorganic (when  $RH > SRH$ ) and organic water in the organic partitioning medium reduced the

mean bias in SOA for routine monitoring networks and improved model performance compared to observations from SOAS. Property updates from this work will be released in CMAQ v5.2.

## 1 Introduction

Water is a ubiquitous component of atmospheric aerosol (Nguyen et al., 2016) that can interact with organic compounds in a number of ways to influence particulate matter (PM) mass and size, human health, and Earth's radiative balance. While constituents such as sulfate and nitrate often drive aerosol water concentrations, inorganic and organic compounds are internally mixed under humid conditions (You et al., 2013), and hydrophilic organic compounds promote the uptake of water (Saxena et al., 1995). Uptake of water onto the organic phase increases particle size, making particles more effective at interacting with radiation (Chung and Seinfeld, 2002), obscuring visibility (Lowenthal and Kumar, 2016), and forming clouds (Novakov and Penner, 1993). Water can serve as a medium for partitioning of soluble (Carlton and Turpin, 2013; Pun et al., 2002) and semivolatile (Chang and Pankow, 2010; Pankow and Chang, 2008; Seinfeld et al., 2001) gases, thus contributing to particulate matter concentrations. Once in the particle-phase, organic compounds can participate in water-mediated reactions such as hydrolysis, driving isoprene epoxydiol uptake to the particle (Surratt et al., 2010; Pye et al., 2013) and loss of gas-phase organic nitrates (Fisher et al., 2016).

Organic aerosol-water interactions have been examined in a number of laboratory and field studies, and results are mixed. The lack of a consistent relationship in laboratory work may be partially due to experimental conditions such as high mass loadings that minimize the effect of water on semivolatile systems (Pankow and Chang, 2008). Laboratory studies have observed no significant change in yield with increasing relative humidity (RH) (Edney et al., 2000; Boyd et al., 2015), enhanced yields under dry conditions (Zhang et al., 2011), and higher yields with increasing aerosol water (Wong et al., 2015) depending on the precursor, oxidant, and seed. Trends in ambient aerosol organic carbon are consistent with the trend in decreasing aerosol water in the southeast U.S. (Nguyen et al., 2015b), and Hennigan et al. (2008) observed episodic correlations of water-soluble organic carbon and water vapor. However, Hennigan et al. (2008) found no well-defined relationship over the entire summer in Atlanta, GA, and organic aerosol was not correlated with liquid water content in Pittsburgh, PA (Griffin et al., 2003). Saxena et al. (1995) found that the presence of organic compounds suppressed aerosol water in urban locations. In the atmosphere, the relative roles of different secondary organic aerosol (SOA) species change as a function of time and space and each species may have a different sensitivity to aerosol water.

The interaction of primary organic aerosol (POA), SOA from low-volatility and semivolatile ( $C_i^* < 3000 \mu\text{gm}^{-3}$ ) compounds, SOA from aqueous pathways, and the inorganic/water-rich phase is important for the concentration of organic aerosol (OA) as partitioning is a function of the availability of an absorptive medium. Current chemical transport models, including the Community Multiscale Air Quality (CMAQ) model (Carlton et al., 2010), consider SOA to be exclusively or dominantly formed via condensation of organic compounds in the absence of water. Individual model studies have examined hydrophobic and hydrophilic SOA through semi-mechanistic algorithms and surrogate structure information. Pun et al. (2002) used a decoupled approach in which organic species partitioned only to their dominant phase (aqueous vs organic). Griffin et al. (2003)

allowed compounds to partition to both phases in varying amounts based on their properties. Jathar et al. (2016) examined the implications of water uptake to the organic phase and the effects on OA concentrations. Pun (2008) allowed organic compounds to interact with water and separate into two phases if thermodynamically favorable. None of these approaches considered mixing of the inorganic and organic phases and often required computationally intensive calculations of activity coefficients. These models accounting for aerosol water-organic interactions are not in widespread use and have not been evaluated with recently available observations of aerosol water.

Figure 1 shows the contribution of POA and water-soluble OA (determined from water soluble organic carbon, WSOC (Sullivan et al., 2004)) to total OA as observed during the Southern Oxidant and Aerosol Study (SOAS) for June 2013 in Centreville, AL. Ambient measurements of WSOC are highly correlated with oxygenated organic aerosol (OOA) (Kondo et al., 2007), and water-soluble OA accounted for 90% of total OA on average in the southeast US during summer 2013 (Washenfelder et al., 2015). WSOC has also been proposed to ~~represent~~ contain SOA from aqueous pathways with evidence for reversible (El-Sayed et al., 2015) and irreversible (El-Sayed et al., 2016) formation. CMAQ tends to over-predict the concentration of POA by almost a factor of 2 during SOAS (Pye et al., 2015). CMAQ predicts a relatively minor role for aqueous OA with the dominant source of OA in CMAQ being dry processes (other SOA in Figure 1).

~~This~~ Through a series of sensitivity simulations (outlined in Section 2.1), this work aims to understand if interactions of aerosol water with semivolatile compounds can resolve model-measurement discrepancies and to what degree OA predicted by models should be classified as water soluble. Semi-empirical SOA in the CMAQ model (Section 2.2) was connected to a consistent set of properties useful for predicting atmospherically relevant behavior such as interaction with aerosol water. In cases where a specific molecular species was not already used as a surrogate, aerosol properties were linked to volatility and parent hydrocarbon (Section 2.3). These quantities allowed molecular weights, organic matter to organic carbon (OM/OC) ratios, Henry's law coefficients, deposition properties, hygroscopicity ( $\kappa_i$ ), phase separation (Section 2.4), water uptake (Section 2.5), and deviations from ideality (Section 2.7) to be predicted semi-empirically. ~~The~~ and influence partitioning (Section 2.6). In addition, the fraction WSOC was estimated for model species (Section 2.8), and primary vs. secondary organic aerosol was estimated for monitoring networks (Section 2.9). The property updates will be available in CMAQ v5.2 and their effects on model predictions are illustrated in Section 3.1. The implications of the updates for OA and particle-phase liquid water content (LWC) are examined in the context of routine monitoring networks and SOAS observations (Section 3.2).

## 2 Method

### 2.1 Simulations

CMAQ v5.1 (Appel et al., 2016) with additional updates was run over the eastern United States for June 2013 at 12km by 12km horizontal resolution using the same domain and meteorological inputs as in the work of Pye et al. (2015). Anthropogenic emissions were based on the EPA National Emission Inventory (NEI) 2011 v1. Isoprene emissions were predicted with the Biogenic Emission Inventory System (BEIS) v3.6.1 (Bash et al., 2016). BEIS often predicts lower emissions than the Model of Emissions of Gases and Aerosols from Nature (MEGAN) (Carlton and Baker, 2011), and isoprene emissions were increased



by 50% in this work to better agree with observations of isoprene and OH at the SOAS Centreville, AL (CTR) site (Figure S1i-h).

A baseline simulation including surrogate property updates detailed in section 2.3 (molecular weight, Henry's law coefficients, etc) and three sensitivity simulations examining the implications of aerosol liquid water for SOA were conducted (Figure 2). In the baseline simulation, POA and traditional SOA were designated hydrophobic and did not interact with aerosol water or SOA produced through aqueous pathways following common chemical transport model assumptions. Two sensitivity simulations examined the implications of aerosol water on semivolatile partitioning via increases in the partitioning medium assuming ideal mixing. In one simulation (ideal  $W_i$ ), POA, traditional SOA, aqueous SOA, and water associated with inorganic constituents were assumed to form one ideal phase when RH was above the separation relative humidity (SRH) and undergo liquid-liquid phase separation into organic-rich (POA and traditional SOA) and water-rich (aqueous SOA and inorganic constituents) ideal phases otherwise. When one phase was predicted to be present ( $SRH < RH$ ), interactions of semivolatile organic compounds and inorganic water were assumed ideal. When phase separation occurred, semivolatile organic compounds did not interact with water. In the second simulation, uptake of water to the organic phase ( $W_o > 0$ ) was predicted based on its OM/OC and  $\kappa$ -Köhler theory (Petters and Kreidenweis, 2007) (Section 2.5). Thus, ideal  $W_i$  and  $W_o > 0$  simulations are meant to capture the effects of inorganic and organic water under ideal conditions separately. The impacts of phase separation and water uptake to organic species along with deviations from ideality via an activity coefficient ( $\gamma$ ) were simulated together in the third sensitivity simulation ( $\gamma \neq 1$ ).

## 2.2 CMAQ organic aerosol

CMAQ v5.1 contains several types of SOA with different sensitivities to aerosol water: traditional semivolatile SOA from Odum 2-product representations, nonvolatile SOA produced by volatile organic compound (VOC) reaction, heterogeneously produced SOA parameterized by an uptake coefficient, semivolatile organic nitrate SOA and its hydrolysis product, and other contributions from cloud processing and accretion/oligomerization reactions (Figure 3, Table 1). The traditional SOA systems in CMAQ include SOA from isoprene, monoterpenes, sesquiterpenes, benzene, toluene, xylene, alkanes, and polycyclic aromatics hydrocarbons (PAHs) (Carlton et al., 2010; Pye and Pouliot, 2012). The semivolatile SOA from these precursors is allowed to oligomerize to a nonvolatile form on a 29-hour timescale (Carlton et al., 2010). Currently, low- $NO_x$  oxidation of aromatics leads to nonvolatile SOA in the traditional systems. Glyoxal, methylglyoxal, and epoxides undergo heterogeneous uptake to form SOA (Pye et al., 2013, 2015). Glyoxal SOA forms using a fixed uptake coefficient of 0.0029 (Liggio et al., 2005). Following the approach of Marais et al. (2016), methylglyoxal's uptake coefficient was scaled to the glyoxal uptake coefficient by the relative Henry's law coefficient (resulting in an uptake coefficient of  $2.6 \times 10^{-4}$ ) in this work. Isoprene epoxydiol (IEPOX) SOA is parameterized with an uptake coefficient calculated as a function of aerosol-phase constituents, including sulfate and water assuming an acid-catalyzed mechanism (Pye et al., 2013). In this work, the IEPOX organosulfate formation rate constant was updated to  $8.83 \times 10^{-3} \text{ M}^{-2}\text{s}^{-1}$  using the ratio of 2-methyltetrol to organosulfate formation rate constants from Piletic et al. (2013) and a 2-methyltetrol rate constant of  $9 \times 10^{-4} \text{ M}^{-2}\text{s}^{-1}$  (Eddingsaas et al., 2010). This organosulfate rate constant is more aggressive (overall and relative) than predicted by Riedel et al. (2016). Overestimates of the

organosulfate in the model may compensate for missing IEPOX-derived SOA species such as C<sub>5</sub>-alkene triols (Surratt et al., 2010) or additional oligomers (Lopez-Hilfiker et al., 2016). In addition, the Henry's law coefficient was updated to  $3.0 \times 10^7$  Matm<sup>-1</sup> (Nguyen et al., 2014a) which improved model predictions of 2-methyltetrols (supporting information) and total isoprene OA. The diffusivity of ~~isoprene products~~ IEPOX in the particle ( $D_a$ , cm<sup>2</sup>s<sup>-1</sup>) was predicted by fitting a line through the

$$D_a = 10^{(7.18RH - 12.7)} \quad (1)$$

for  $0 \leq RH \leq 1$ . Semisolid ~~aerosol~~-organic aerosol ( $D_a < 10^{-12}$  cm<sup>2</sup>s<sup>-1</sup>) is not expected in the humid eastern US during summer (Pajunoja et al., 2016). SOA from later-generation high-NO<sub>x</sub>/high-NO<sub>2</sub> SOA species (methacrylic acid epoxide and hydroxymethyl-methyl- $\alpha$ -lactone) is relatively minor (Pye et al., 2013; Marais et al., 2016), consistent with observations from SOAS ground sites (Budisulistiorini et al., 2015). All SOA produced through heterogeneous uptake is assumed nonvolatile in CMAQ v5.1. SOA from isoprene and monoterpene organic nitrates is semivolatile, but the nitrate groups hydrolyze in the particle to produce SOA which is assumed nonvolatile and nitric acid (Pye et al., 2015). SOA from cloud processing is ~~relatively minor in terms of average SOA concentrations~~ predicted to result in less than 3% of total organic aerosol in CMAQ. POA and volatility-based SOA is treated as hydrophobic by default, while aqueous and in-cloud SOA is assumed hydrophilic and resides in a water-rich phase (CMAQv5.1 aero6i assumptions, Table 1).

## 2.3 Updating properties of semivolatiles

### 2.3.1 Molecular properties

For SOA systems, the molecular weight and OM/OC by mass must be specified for mass-to-molecule number unit conversions within CMAQ and to allow for post-processing of organic carbon (OC) from total SOA for comparison to observations. The number of carbons per molecule ( $n_C$ ) is also specified for the traditional semivolatile systems to allow for oligomerization to conserve carbon (Carlton et al., 2010). Historically, in CMAQ model formulations (v5.1 and prior), the  $n_C$ , saturation concentration ( $C_i^*$ ), and OM/OC were set independently with the OM/OC obtained from chamber experiments and  $n_C$  set to that of the parent hydrocarbon. The molecular weight was calculated to be consistent with the number of carbons and OM/OC. The OM/OC values were not a function of volatility or peroxy radical (RO<sub>2</sub>) fate. Thus, all SOA species from a given parent hydrocarbon were assumed to have the same properties (OM/OC, molecular weight, number of carbons) regardless of their volatility. When viewed in the O:C vs  $C_i^*$  space (Baker et al., 2015) this leads to some apparent contradictions such as sesquiterpene SOA being more functionalized and having a longer carbon backbone at a given vapor pressure than isoprene or monoterpene SOA. This inconsistency is also seen in the molecular weight vs.  $C_i^*$  space (Figure 4). Most SOA constituents are expected to show that molecular weight is correlated with vapor pressure ( $C_i^*$ ) with more functionalized species having a shallower slope than less functionalized species (Shiraiwa et al., 2014). Systems examined by Shiraiwa et al. (2014) were found to reside between a line characteristic of O:C=0 (alkane, C<sub>n</sub>H<sub>2n+2</sub>) and O:C=1 (sugar, C<sub>n</sub>O<sub>n</sub>H<sub>2n-2</sub>). Sesquiterpene SOA in CMAQ v5.1 resides outside the molecular corridor bounds that correspond to O:C=0 (OM/OC=1.17) and O:C=1 (OM/OC=2.3

to 2.5). The CMAQv5.1 Odum 2-product isoprene SOA components imply an O:C>1 (which is possible, but not observed by Shiraiwa et al. (2014) and infrequent in the work of Chen et al. (2015)).

Structure-activity relationships or group contribution methods can be used to relate vapor pressure, molecular weight, and OM/OC (or molar O:C). Donahue et al. (2011) developed a relationship between ~~saturation concentration~~ the saturation

5 concentration of a pure species ( $C_i^*=C_{0,i}^*$ ), number of carbons per molecule, and number of oxygens per molecule ( $n_O$ ) ignoring sulfate and nitrate for use with the 2-D volatility basis set (VBS):

$$\log_{10} C_{0,i}^* = 0.475(25 - n_C) - 2.3n_O + 0.6n_C n_O / (n_C + n_O) \quad (2)$$

Built into this relationship are assumptions about the functionality of semivolatile organic compounds (specifically equal alcohols and ketones with acid terminal groups), the volatility of a 25 carbon alkane ( $C_i^*=1 \mu\text{gm}^{-3}$ ), and how a given functional

10 group affects volatility (from the SIMPOL model (Pankow and Asher, 2008)). Note that considerable variability in atmospheric aging exists in terms of addition of functional groups as indicated on van Krevlen diagrams (Chen et al., 2015). The number of oxygen is related to the molar O:C by

$$n_O = n_C(O : C) \quad (3)$$

O:C can be related to the mass-based OM/OC (Simon and Bhawe, 2012):

$$15 \quad O : C = \frac{12}{15} \left( \frac{OM}{OC} \right) - \frac{14}{15} \quad (4)$$

Which assumes only H, O, and C atoms and produces results consistent with AMS-determined relationships between O:C and OM/OC (Canagaratna et al., 2015). OM/OC was the focus of this work instead of O:C since OM/OC values are directly used to post-process model output for comparison to observation network measurements of OC. In addition, OM/OC ratios are a useful quantity in reconstructing total mass of PM and could be available routinely from the Interagency Monitoring

20 of Protected Visual Environments (IMPROVE) network in the future using Fourier transform infrared spectroscopy (FTIR) analysis (Ruthenburg et al., 2014). The molecular weight ( $\widetilde{M}$ ) follows as:

$$\widetilde{M}_i = 12n_C \left( \frac{OM}{OC} \right) \quad (5)$$

Equations 2 to 5 provide four equations for six unknowns:  $n_C$ ,  $n_O$ , O:C, OM/OC,  $C_i^*$ , and  $\widetilde{M}_i$ .  $C_i^*$  were obtained from the Odum 2-product fits (Odum et al., 1996) derived from laboratory data (Carlton et al., 2010; Pye and Pouliot, 2012) and  $n_C$

25 were set to that of the parent hydrocarbon. The OM/OC and molecular weight were then calculated.  $n_O$  and O:C were not needed for CMAQ (but could be easily obtained). Pankow et al. (2015) undertook a similar exercise in which they developed surrogates for each of the CMAQ v5.0 SOA species using SIMPOL and plausible structures. Their information was used when available and equations 2 to 5 employed otherwise. For the systems where Pankow et al. (2015) provide information, the results based on equations 2 to 5 are very similar. For SOA from the explicit later-generation precursors (such as IEPOX, isoprene

30 dinitrates, and monoterpene nitrates) the molecular properties were already tied to a specific surrogate identity. The CMAQ SOA species representing actual compounds were not updated.

### 2.3.2 Deposition properties

The deposition-related properties of gases, such as their solubility, diffusivity, and reactivity, are related to molecular structure and composition. CMAQ uses a resistance in series method for dry deposition (Pleim and Ran, 2011). CMAQ v4.7 through v5.1 use adipic acid (Henry's law coefficient,  $H = 2 \times 10^8 \text{ Matm}^{-1}$ ) as a wet deposition surrogate for gas-phase semivolatile organic compounds (SVOCs). Default dry deposition of SVOCs is based on acetic acid ( $H = 4.1 \times 10^3 \exp(63,000(298 - T)/(298T))$ )  $4.1 \times 10^3 \exp(63,000K(298 - T)/(298T)) \text{ Matm}^{-1}$ , gas-phase diffusivity ( $D_g$ ) =  $0.0944 \text{ cm}^2\text{s}^{-1}$ , dry cuticular resistance =  $1200 \text{ sm}^{-1}$ , Lebas molar volume =  $63 \text{ cm}^3\text{mol}^{-1}$ ).

Hodzic et al. (2014) used the Generator of Explicit Chemistry and Kinetics of Organics in the Atmosphere (GECKO) to predict products from various SOA systems commonly represented in models. Henry's law coefficients were then estimated based on the GROup contribution Method for Henry's law Estimate (GROMHE) (Raventos-Duran et al., 2010). GROMHE was found to reproduce Henry's Law coefficients [for organic-water systems](#) with mean absolute error of about 0.3 log units compared to 0.5 for HenryWin and 0.4 for SPARCv4.2 (Raventos-Duran et al., 2010). For SOA systems, a strong relationship was observed between saturation concentrations and Henry's law coefficients with chemically aged species being less volatile, more functionalized, and more soluble than their parent hydrocarbon. Although the relationship between  $H$  and  $C_i^*$  was relatively robust, variability in  $H$  spanned many orders of magnitude for a given  $C_i^*$  bin [without considering how inorganic species may modify the Henry's law coefficient](#). The relationships derived by Hodzic et al. (2014) were used to predict the Henry's law coefficients as a function of  $C_i^*$  for each SVOC surrogate in equilibrium with the particle in the model. An enthalpy of solvation of  $50 \text{ kJmol}^{-1}$  was also adopted to adjust the Henry's law coefficients for temperature. Note that although the approach used by Hodzic et al. (2014) is also a group contribution method, it potentially represents the functional groups present in CMAQ SOA species with different groups than would be assumed by equations 2-5.

Additional properties needed for deposition include the gas-phase diffusion coefficient which was calculated as a function of molecular weight via  $D_{g,i} = 1.9(\widetilde{M}_i)^{-2/3} \text{ cm}^2\text{s}^{-1}$  (Schnoor, 1996) and the LeBas molar volume ( $V_{LeBas}$ ) calculated assuming ring-opened products (Mackay et al., 1993):

$$V_{LeBas} = 14.8n_C + 7.4n_O + 3.7n_H \text{ cm}^3\text{mol}^{-1} \quad (6)$$

where the number of hydrogens,  $n_H$ , is calculated from the molecular weight assuming only carbon, oxygen, and hydrogen. Modifications were also made to the deposition parameters affecting  $\text{H}_2\text{O}_2$ , IEPOX, and organic nitrates to produce results consistent with Nguyen et al. (2015a) (parameters available in the supporting information).

### 2.4 Predicting phase separation

The solubility of an organic compound in water generally decreases due to addition of a salt with some exceptions like glyoxal (Kampf et al., 2013). However, as atmospheric aerosols contain water, salts, and organic compounds, there are likely conditions where the solubility of an organic is more or less favorable in the water/inorganic-rich phase. Mixed organic-inorganic solutions have been observed to phase separate into an organic-rich and inorganic-rich phase based on their degree of functionalization

(as measured by O:C) and relative humidity. The O:C serves as a proxy for molar polarization which dictates the magnitude of salting out effect through the Setchenov equation (Bertram et al., 2011). The relative humidity above which a single combined phase exists is called the separation relative humidity (SRH). ~~In CMAQ, when the ambient relative humidity was below the SRH, the model separated the particle into a water-rich phase (containing aqueous SOA) and organic-rich phase (containing traditional SOA and POA). This separation of aqueous SOA and traditional SOA at low RH is consistent with the work of Ye et al. (2016) who found that isoprene surrogates unfavorably interacted with  $\alpha$ -pinene SOA even at 60% RH.~~ The SRH is not expected to be a strong function of the organic-to-inorganic ratio (Bertram et al., 2011; You et al., 2013), molecular weight of the organic species, or temperature between 244 and 290K (You and Bertram, 2015). However, the SRH is a function of the type of salt present with ammonium sulfate having higher SRH (and less frequent mixing) than ammonium bisulfate, sodium chloride, and ammonium nitrate for a given O:C. During SOAS, inorganic aerosol was dominated by  $(\text{NH}_4)_2\text{SO}_4$  and  $\text{NH}_4\text{HSO}_4$ , and SRH was diagnosed in CMAQ based on the You et al. (2013) experimental results for ammonium sulfate. The relationship for SRH (fraction between 0 and 1) as a function of O:C was recast in terms of OM/OC:

$$SRH = \left[ 1 + \exp \left( 7.7 \frac{OM}{OC} - 15.8 \right) \right]^{-1} \quad (7)$$

Since ammonium sulfate has the highest SRH of the salts examined by You et al. (2013), choosing another salt would increase the frequency of phase-mixing and difference compared to the base simulation.

For simulations considering phase separation in CMAQ (ideal  $W_i$  and  $\gamma \neq 1$ ), when the ambient relative humidity was below the SRH, the model separated the particle into a water-rich phase (containing aqueous SOA) and organic-rich phase (containing traditional SOA and POA). This separation of aqueous SOA and traditional SOA at low RH is consistent with the work of Ye et al. (2016) who found that isoprene surrogates unfavorably interacted with  $\alpha$ -pinene SOA even at 60% RH.

## 2.5 Predicting water uptake to the organic phase

Water uptake to the organic phase ~~was predicted~~ ( $W_o > 0$  and  $\gamma \neq 1$  simulations) was predicted in CMAQ using  $\kappa$ -Köhler theory and solving for the volume equivalent diameter,  $D$  (Petters and Kreidenweis, 2007):

$$RH - \frac{D^3 - D_{core}^3}{D^3 - D_{core}^3(1 - \kappa)} \exp \left( \frac{4\sigma_w \widetilde{M}_w}{RT\rho_w D} \right) = 0 \quad (8)$$

and

$$D_{core} = \left( \frac{6}{\pi} \sum_{i \neq W_o} V_i \right)^{1/3} \quad (9)$$

where  $D_{core}$  is the volume (V) equivalent accumulation mode diameter excluding water associated with organic species,  $\widetilde{M}_w$  is the molecular weight of water,  $\rho_w$  is the density of water,  $R$  is the universal gas constant,  $T$  is temperature, and  $\sigma_w$  is the surface tension of water ( $0.072 \text{ J m}^{-2}$ ). In order to calculate the volume equivalent diameters,  $D$  and  $D_{core}$ , particle density was needed. Density values in CMAQ v4.7-v5.1 for organic constituents are generally on the order of  $2,000 \text{ kg m}^{-3}$ . The

densities of organic aerosol species were updated to chamber specific information when available (Ng et al., 2007; Chan et al., 2009) and  $1,400 \text{ kgm}^{-3}$  otherwise. The mass of particle liquid water associated with organic compounds per volume of air ( $W_o$ ) was calculated from:

$$W_o = \frac{\pi N_p \rho_w}{6} (D^3 - D_{core}^3) \quad (10)$$

- 5 where  $N_p$  was number of particles per volume air. Total aerosol water in the model was computed as the sum of water associated with inorganics ( $W_i$ ) calculated with ISORROPIA v2.2 (Fountoukis and Nenes, 2007) and  $W_o$ .

The hygroscopicity parameter,  $\kappa$ , was calculated as a volume weighted sum of the individual component  $\kappa_i$  (Petters and Kreidenweis, 2007) ÷ ignoring water associated with organics:

$$\kappa = \sum_{i=1}^n \frac{\kappa_i V_{core,i}}{V_{core}} \frac{\sum_{i \neq W_o} (\kappa_i V_i)}{\sum_{i \neq W_o} (V_i)} \quad (11)$$

- 10 CCN-based  $\kappa$ s were used following Lambe et al. (2011) due to the completeness of that study. The O:C values obtained by Lambe et al. (2011) were increased 27% to account for a low bias in old calibrations (Canagaratna et al., 2015). In addition, the relationship was recast in terms of OM/OC resulting in:

$$\kappa_{org,i} = 0.11 \frac{OM}{OC} - 0.10 \quad (12)$$

Equations in terms of O:C are available in the supporting information.

- 15 For subsaturated conditions, like those relevant to predicting water uptake, the hygroscopic growth factor (hgf)  $\kappa$  is most relevant (Pajunoja et al., 2015); however, CMAQ simulations used CCN-based  $\kappa_{org,i}$  to predict water uptake. Hgf-based kappas- $\kappa$ s from Duplissy et al. (2011) and Raatikainen et al. (2010) were combined with data from Jimenez et al. (2009) into a parametrization by Lambe et al. (2011). After correcting the parameterization to use updated O:C, the parametrization including hgf-based data resulted in one negative kappa-and-three-kappas- $\kappa$  and three  $\kappa$ s higher than 0.6 (same as ammonium sulfate), which may be an upper limit on  $\kappa_{org,i}$  (Ervens et al., 2011). Thus, contrary to the typical trend of  $\kappa_{CCN} > \kappa_{hgf}$ , more than half of the species had  $\kappa_{CCN} < \kappa_{hgf}$ . Variation from study to study may be higher than  $\kappa_{CCN}$  vs  $\kappa_{hgf}$  variations, which have been found to be within 30% for many compounds and unable to be resolved using common measurement techniques (Petters and Kreidenweis, 2007).
- 20

- In processing of model output, the following equation was used to determine how errors in the concentration of organic compounds ([OA]),  $\kappa_{org}$ , and RH propagated to errors in  $W_o$ :
- 25

$$W_o = \frac{\rho_w}{\rho_{org}} [OA] \kappa_{org} \frac{1}{(1/a_w - 1)} \quad (13)$$

with the activity of water ( $a_w$ ) defined as

$$a_w = \frac{RH}{\exp \frac{4\sigma_w \widetilde{M}_w}{RT\rho_w D}}. \quad (14)$$

## 2.6 Representing the effect of water on semivolatile partitioning

Partitioning of semivolatile organic species into an absorbing medium can be described by [a modified Raoult's law \(Seinfeld and Pandis, 2006\)](#):

$$\frac{A_i/M_p}{G_i} = \frac{RT}{\widetilde{M}_p \gamma_i P_i^{sat}} \quad (15)$$

- 5 where  $A_i$  is the aerosol-phase concentration of species  $i$  ( $\mu\text{gm}^{-3}\text{air}$ ),  $G_i$  is the gas-phase concentration of  $i$  ( $\mu\text{gm}^{-3}\text{air}$ ),  $M_p$  is the mass of the partitioning medium ( $\mu\text{gm}^{-3}\text{air}$ ),  $\widetilde{M}_p$  is the molecular weight of the partitioning medium,  $\gamma_i$  is a mole-based activity coefficient, and  $P_i^{sat}$  is the saturation vapor pressure of pure  $i$ . This relationship (equation 15) is true regardless of how the partitioning coefficient ( $C_i^*$  or  $K_{p,i}$ ) is defined. CMAQ, following Schell et al. (2001), defines  $C_i^*$  as:

$$C_i^* \equiv \frac{\widetilde{M}_i \gamma_i P_i^{sat}}{RT} \quad (16)$$

- 10 where the relevant molecular weight is the individual species molecular weight in contrast to the traditional definition of Pankow (1994) that uses the partitioning medium's molecular weight:

$$C_i^{*'} = \frac{1}{K_{p,i}} \equiv \frac{\widetilde{M}_p \gamma_i P_i^{sat}}{RT} \quad (17)$$

Model calculations in this work used the definition in equation 16 thus:

$$C_i^* = \frac{G_i \widetilde{M}_i N}{A_i} \quad (18)$$

- 15 where the total moles in the partitioning medium ( $N$ ) is

$$N = N_{other} + \sum_i (A_i / \widetilde{M}_i) \quad (19)$$

$N_{other}$  represents aerosol in the partitioning medium that is not semivolatile during calculation. Including water in the partitioning medium (either from uptake onto hydrophilic organic compounds or from the inorganic phase) increases the moles of partitioning medium by contributing to  $N_{other}$ . Inclusion of water, and even inorganic constituents, in the absorbing phase has

- 20 been encouraged for simplified models in order to reproduce more detailed calculations (Zuend et al., 2010).

One equation for one unknown can be derived where  $T_i$  is the total ( $G_i + A_i$ ) mass of the semivolatile determined by the mass-based stoichiometric coefficients and amount of parent hydrocarbon reacted ( $\alpha_i \Delta HC$ ):

$$f(N) = 0 = \frac{N_{other}}{N} - 1 + \sum_i \frac{T_i}{C_i^* + \widetilde{M}_i N} \quad (20)$$

Equation 20 was solved for  $N$  in the model.

- 25  $\widetilde{M}_p \approx \widetilde{M}_i$  for interpretation of data from chamber experiments only, and it allows for  $C_i^{*'} \approx C_i^*$  in a single-precursor chamber experiment so that the Odum 2-product fit can be determined. Table 2 indicates this was a realistic assumption for most systems as the two surrogate molecular weights vary by less than 10%. This assumption was not necessary within the CMAQ model.



## 2.7 Estimating solubility and deviations from ideality

~~To represent deviations from ideality~~ When deviations in ideality were considered, the saturation concentration used in the modified Raoult's law was adjusted using an activity coefficient. All organic-organic interactions were assumed ideal and only the inclusion of water drove deviation from ideality. Observations during SOAS indicate that despite a factor of seven change in ambient aerosol water concentration from night to day,  $x_w$  (mole fraction water in the partitioning medium) typically varied over a narrow range (80% to 96% by mole) throughout the day. The activity coefficient for each organic species,  $\gamma_i$ , was determined using a one-constant Margules equation:

$$\ln(\gamma_i) = x_w^2 \ln(\gamma_i^\infty) \quad (21)$$

Since  $\gamma_i^\infty$  (the temperature dependent constant in the Margules equation) corresponds to the activity coefficient at infinite dilution in water ( $x_w = 1$ ), it can be estimated based on Henry's law combined with Raoult's law:

$$\gamma_i^\infty = \frac{\widetilde{M}_i \rho_w}{H_i C_{0,i}^* RT \widetilde{M}_w} \quad (22)$$

where  $C_{0,i}^*$  is the pure species saturation concentration at T.  $\gamma_i^\infty$  is related to solubility ( $S_i$ ) in mass per volume of water:

$$S_i = H_i C_{0,i}^* RT \quad (23)$$

The saturation concentration as a function of water becomes

$$C_i^* = C_{0,i}^* (\gamma_i^\infty)^{N_w^2/N^2} \quad (24)$$

where  $N_w$  is the moles of aerosol water in the partitioning medium. This equation applies across the entire organic to water spectrum and shows that  $\gamma_i^\infty$  represents  $C_i^*$  of a species in water ( $x_w = 1$ ) normalized to the pure species  $C_{0,i}^*$ . Evaluating  $C_i^*$  for pure water provides,  $C_{H,i}^*$ , the saturation concentration at infinite dilution:

$$C_{H,i}^* = \frac{\widetilde{M}_i \rho_w}{H_i RT \widetilde{M}_w} \quad (25)$$

Values are available in Table 2. The solubilities of nonvolatile species derived from traditional precursors (oligomers/accretion products) were estimated based on assuming a  $C_{0,i}^*$  between  $10^{-2}$  and  $10^{-5}$   $\mu\text{gm}^{-3}$  and the Henry's law coefficients of Hodzic et al. (2014).

This representation of deviations from ideality resulted in competing effects due to the addition of aerosol water to the partitioning medium. Adding water increased the partitioning medium as described in section 2.6, which led to more SOA.

However, adding water also increased the activity coefficient via the Margules model (Figure S2) leading to higher  $C_i^*$  and less favorable partitioning (Figure S3). The Margules model, combined with the fact that all deviations are observed to be positive for the species examined here indicated large additions of water reduced SOA due to the activity coefficient adjustment. Indeed, all saturation concentrations for partitioning into pure water ( $C_{H,i}^*$ ) are higher than those into pure organic ( $C_{0,i}^*$ ) by one to

four orders of magnitude (Table 2). *A priori* assumptions regarding the solubility and activity of monoterpene nitrates were so non-ideal that particulate nitrate was driven entirely out of the particle, inconsistent with observations (Xu et al., 2015a, b). As a result, the Henry's law coefficient for monoterpene nitrates (MTNO<sub>3</sub>) was increased by a factor of 100 and all activity coefficients were reduced by a factor of 10 compared to *a priori* values in the CMAQ  $\gamma \neq 1$  simulation (detailed in a subsequent section). These adjustments, determined through a series of sensitivity simulations, may have been necessary due to inaccuracies in the Henry's law coefficients, effects of inorganics, pure species saturation concentrations, molecular weights, Margules model, or a combination of all of the above. *A posteriori* parameters used in  $\gamma \neq 1$ , which include a factor of 100 increase in MTNO<sub>3</sub> solubility and factor of 10 decrease in activity coefficients, are available in Table S6.

## 2.8 Estimating WSOC

WSOC is an operationally defined species measured by adding water to a system and analyzing the dissolved compounds (Sullivan et al., 2004). Particulate compounds with solubilities greater than 10 g/L tend to be measured as WSOC regardless of the sampling and extraction method while compounds with solubilities less than  $1 \times 10^{-4}$  g/L are insoluble (Psichoudaki and Pandis, 2013). To determine the fraction of OA extracted as WSOC (WSOC<sub>p</sub>), the particle phase can be modeled as an equilibrium between two phases: a and b. The fraction of species, *i*, in phase a compared to the total particulate species concentration is:

$$f_{a,i} = \left( 1 + \frac{C_{a,i}^* N_b}{C_{b,i}^* N_a} \right)^{-1} \quad (26)$$

where  $N_a$  and  $N_b$  are the number of moles in phases a and b respectively. If phase b has no water and is ideal while phase a is dominated by water and obeys Henry's law, then the fraction of aerosol species *i* extracted as WSOC<sub>p</sub> ( $f_{WSOC,i}$ ) is

$$f_{WSOC,i} = \left( 1 + \gamma_i^\infty \frac{WIOA}{LWC} \frac{\widetilde{M}_w}{\widetilde{M}_i} \right)^{-1} \quad (27)$$

where WIOA and LWC are concentration of water insoluble OA and liquid water in mass per volume of air. Thus WSOC depends on the amount of insoluble material, liquid water, Henry's law coefficient, and pure species saturation concentration.

## 2.9 Simulations

CMAQ v5.1 (Appel et al., in preparation) with additional updates was run over the eastern United States for June 2013 at 12km by 12km horizontal resolution using the same domain and meteorological inputs as in the work of Pye et al. (2015). Anthropogenic emissions were based on the EPA National Emission Inventory (NEI) 2011 v1. Isoprene emissions were predicted with the Biogenic Emission Inventory System (BEIS) v3.6.1 (Bash et al., 2016). BEIS often predicts lower emissions than the Model of Emissions of Gases and Aerosols from Nature (MEGAN) (Carlton and Baker, 2011), and isoprene emissions were increased by 50% in this work to better agree with observations of isoprene and OH at the SOAS Centreville, AL (CTR) site (Figure S11-h).

A baseline simulation including surrogate property updates detailed in section 2.3 (molecular weight, Henry's law coefficients, etc) and three sensitivity simulations examining the implications of aerosol liquid water for SOA were conducted (Figure 2). In the baseline simulation, POA and traditional SOA were designated hydrophobic and did not interact with aerosol water or SOA produced through aqueous pathways following common chemical transport model assumptions. Two sensitivity simulations examined the implications of aerosol water on semivolatile partitioning via increases in the partitioning medium assuming ideal mixing. In one simulation, POA, traditional SOA, aqueous SOA, and water associated with inorganic constituents were assumed to form one ideal phase when RH was above the separation relative humidity (SRH) and undergo liquid-liquid phase separation (LLPS) into organic-rich (POA and traditional SOA) and water-rich (aqueous SOA and inorganic constituents) ideal phases otherwise. In the second simulation, uptake of water to the organic phase ( $> 0$ ) was predicted based on its OM/OC and  $\kappa$ -Köhler theory (Petters and Kreidenweis, 2007). The impacts of phase separation and water uptake to organic species along with deviations from ideality via an activity coefficient ( $\gamma$ ) were simulated together in the third sensitivity simulation ( $\gamma \neq 1$ ). *A posteriori* parameters used in  $\gamma \neq 1$  are available in Table S6.

## 2.9 Observations for Evaluation

Simulations were evaluated by comparing to OC from IMPROVE, Chemical Speciation Network (CSN), and SouthEastern Aerosol Research and Characterization (SEARCH) network observations in the Eastern U.S. For comparisons to SEARCH observations, the Jefferson Street, Atlanta, GA (JST) and Birmingham, AL (BHM) urban sites as well as Yorkville, GA (YRK) and Centreville, AL (CTR) rural sites were considered. In order to estimate secondary organic carbon (SOC), the method of Yu et al. (2007), which uses OC/EC ratios, was revised to account for the semivolatile nature of POA. The total nonvolatile For estimating observed POA from total OA only, POA in CMAQ is assumed to correspond to emissions of  $C_i^* \approx 3000 \mu\text{gm}^{-3}$  and lower volatility compounds. The volatility distribution of gasoline vehicle POA from May et al. (2013) and used by the CMAQ-VBS (Koo et al., 2014) was used to estimate how much POA is expected in the particle under ambient conditions.

The fraction of POA in the particle ( $f_p$ ) for each observation data point was estimated as:

$$f_p = \sum_{i=1}^5 \frac{\alpha_i}{1 + C_i^* / (OC_{obs}(OM/OC)_{mod})} \quad (28)$$

where the volatility profile is described by one nonvolatile and  $C_i^*$  of 0, 1, 10, 100, and  $1000 \mu\text{gm}^{-3}$  surrogate species in the following mass-based abundance ( $\alpha_i$ ): 0.27, 0.15, 0.26, 0.16, and 0.17. Observed SOC was estimated from each observed OC by

$$SOC_{obs} = OC_{obs} - f_p(POC/EC)_{mod}EC_{obs} \quad (29)$$

therefore

$$POC_{obs} = f_p(POC/EC)_{mod}EC_{obs} \quad (30)$$

This calculation only accounts for the effect of dilution and partitioning on POC and does not account for chemical processing that may convert POA to SOA. In addition, compared to other volatility profiles such as diesel POA, this profile tends to be

weighted toward lower volatility compounds. As a result, this approach may be an upper bound on the amount of POC (lower bound on SOC).

In addition to the routine monitoring network data, model predictions were compared to data from the Centreville, AL (CTR, 87.25° W longitude, 32.90° N latitude) and Look Rock, TN (LRK, 83.94° W longitude, 35.63° N latitude) sites from the SOAS field campaign in the southeast United States. Observations include water-soluble organic carbon in both particle and gas phase (Xu et al., in preparation; Sullivan et al., 2004), aerosol LWC (Nguyen et al., 2014b; Guo et al., 2015), OA (Xu et al., 2015a, b; Budisulistiorini et al., 2015; Hu et al., 2015), and gas-phase species (Nguyen et al., 2015a; Budisulistiorini et al., 2015). The supporting information provides additional evaluation such as a comparison to OH (~~Feiner et al., submitted~~) ([Feiner et al., 2016](#)), isoprene (Su et al., 2016; Misztal et al., in preparation), and 2-methyltetrol (~~Isaacman et al., 2014~~) ([Isaacman et al., 2014](#); [Isaacman-VanWertz et al., 2016](#)) concentrations.

### 3 Results and Discussion

#### 3.1 Updated Base Model

##### 3.1.1 Effect of Property Updates

Figure 4 shows the updated molecular weights as a function of [pure species](#) saturation concentration and colored by OM/OC. Values are summarized in Table 2. Four species that were initially outside the O:C=0 and O:C=1 bounds in CMAQ v5.1, AISO1, AISO2, ASQT and, ABNZ3, were moved within the bounds or just slightly outside as a result of implementing equations 2 through 5 for traditional OA. The impact of updated OM/OC and molecular weight had small impacts on OM (up to 4% decreases) and larger impacts on OC (5-8% decrease in OC across the Southeast). This change was driven by an increase in the OM/OC of biogenic (semivolatile isoprene and monoterpene) SOA.

Note that there is likely inconsistency in the structure and assumed vapor pressure for 2-methyltetrols and 2-methylglyceric acid. The model considers IEPOX-derived SOA to be mainly 2-methyltetrols and organosulfates with a small amount of oligomers (Pye et al., 2013). All IEPOX-derived species were treated as nonvolatile, but they should be semivolatile given their molecular weight. Lopez-Hilfiker et al. (2016) indicate that IEPOX-derived organosulfates and 2-methyltetrols measured by common techniques include decomposition products of accretion reactions and that IEPOX-SOA should be relatively nonvolatile, consistent with Hu et al. (2016) and the nonvolatile assumption here. The nonvolatile assumption is, however, inconsistent with 2-methyltetrols being present in the gas-phase as observed by Xie et al. (2014). The glyoxal SOA in CMAQ also corresponded to a monomeric unit. If oligomers are the dominant form for aqueous methylglyoxal SOA (Altieri et al., 2008), then the molecular weight would need to be increased. Given the nonvolatile nature of IEPOX-derived SOA and glyoxal SOA, they were not significantly affected by the sensitivity simulations.

In the base and updated models, dry deposition of OA played a relatively minor role in removing semivolatile compounds from the system. Volatility was the primary factor determining the relative role of gas vs particle deposition for a given species with the specific value of the Henry's law coefficient being less important as indicated by relatively small changes in overall

deposition between the base and update (Figure 5). At 298K, the less volatile SVOCs became more soluble than predicted by base CMAQv5.1 while the more volatile SVOCs became less soluble. With the new parameters, dry deposition of gas-phase SVOCs increased 20% while wet deposition decreased 6%. Total SOA+SVOC deposition changed by less than 2% and surface concentrations changed by less than 3%. Overall, particle-phase deposition accounted for 22% of the loss of SOA+SVOC mass. Dry deposition of gas-phase SVOCs accounted for 32%, and wet deposition of gas-phase SVOCs accounted for 46%. The relative role of gas-phase SVOC wet deposition was twice as important as predicted by Hodzic et al. (2014), consistent with the greater contribution from soluble biogenic species in the southeast in this work. The combined effects of the molecular weight, OM/OC, and deposition updates resulted in a 10% decrease in predicted OC over the Southeast.

### 3.1.2 Isoprene SOA

Heterogeneously-derived IEPOX SOA in CMAQ was assumed to be nonvolatile, and thus, was not greatly affected by the sensitivity simulations. Positive matrix factorization (PMF) analysis of Aerosol Chemical Speciation Monitor (ACSM) data and high resolution time-of-flight aerosol mass spectrometer (HR-ToF-AMS) data identified a factor with prominent  $m/z$  82 signals (Lin et al., 2012; Xu et al., 2015a, b). This factor was referred to as "IEPOX-OA" and "isoprene-OA", respectively. While it is largely attributed to IEPOX uptake, it may not be entirely due to IEPOX (Xu et al., 2015a, b; Schwantes et al., 2015). The term "isoprene-OA" will be used to refer to the ambient PMF factor regardless of technique.

Liu et al. (2015) report that only half of the isoprene  $\text{RO}_2 + \text{HO}_2$  SOA is from IEPOX in laboratory experiments. Furthermore, the AMS isoprene-OA PMF factor is not fully speciated. During SOAS at the CTR site, Lopez-Hilfiker et al. (2016) were able to explain roughly 50% of the AMS isoprene-OA at the molecular level. Hu et al. (2015) explained 78% of isoprene-OA at CTR by molecular tracers measured on-line (Isaacman et al., 2014) and identified on filters, but only 26% of isoprene-OA was linked to tracers at LRK (Budisulistiorini et al., 2015). The lack of mass closure in these studies may have resulted from a lack of authentic standards for quantifying accretion products (oligomers and organosulfates).

Regional modeling also indicates a number of later-generation species besides IEPOX contribute significantly to isoprene-derived SOA in the United States. Marais et al. (2016) indicate that isoprene SOA in the eastern US consists mainly of IEPOX (58%) and glyoxal (28%) uptake products with 14% due to other species. Ying et al. (2015) attribute only 20% of isoprene-OA to IEPOX uptake with roughly an equal contribution from MGLY uptake. Semivolatile isoprene OA and its oligomers accounted for just under 10% of isoprene OA in their work. Thus, it is unclear if models can consider only SOA from IEPOX for the isoprene system as a surrogate for AMS measured isoprene-OA.

Figure 6 shows three model definitions of isoprene-OA: SOA due only to IEPOX reactive uptake, SOA due to IEPOX reactive uptake and semivolatile isoprene+OH products, and SOA due to IEPOX and glyoxal/methylglyoxal uptake. Also included are the PMF factor observations of isoprene-OA from Xu et al. (2015a) for CTR and Budisulistiorini et al. (2015) for LRK. SOA is examined relative to sulfate as sulfate provides the acidity and aerosol medium for heterogeneous uptake (Pye et al., 2013; Marais et al., 2016). Modeled SOA due to IEPOX reactive uptake was increased relative to CMAQ v5.1 as a result of the higher rate constant for organosulfate formation implemented in this work compared to the work of Pye et al. (2013). At the CTR site, all definitions of isoprene OA led to overestimates of observed isoprene-OA relative to sulfate. Isoprene OA based on IEPOX

uptake + semivolatile Odum 2-product surrogates led to the highest predicted concentrations and a slope of 0.70 compared to the observed slope of 0.45. As a result, CMAQ IEPOX-OA could respond more strongly to changes in  $\text{SO}_x$  emissions than ambient data would suggest as the regression coefficient has been interpreted as the magnitude of the sulfate control on isoprene OA (Xu et al., 2015a). However, no direct relationship between Odum 2-product isoprene SOA and sulfate exists in CMAQ.

5 The correlation between isoprene OA and sulfate for all three model representations was high ( $r > 0.8$ ) and close to the observed value ( $r = 0.91$ ), which is also consistent with ongoing modeling work with CMAQv5.1 (Vasilakos et al., in preparation). On an absolute basis, predicted IEPOX+SV OA reproduced observed isoprene OA within 6% overall with small underestimates in the afternoon. However, sulfate concentrations were low by 30% and ISOPOOH+IEPOX concentrations (Nguyen et al., 2015a) were overestimated by a factor of 2.4 in the model consistent with other modeling work (Vasilakos et al., in preparation).

10 Thus, as better agreement is obtained for the gas-phase isoprene species, additional increases in processes that convert isoprene  $\text{RO}_2 + \text{HO}_2$  products to the particle phase may be needed despite the overestimates relative to sulfate shown in Figure 6 for Centreville. These additional processes may include accounting for partitioning of 2-methyltetrols to the gas phase, formation of  $\text{C}_5$ -alkene triols, and/or faster oligomerization (Lopez-Hilfiker et al., 2016; Xie et al., 2014; Surratt et al., 2010).

At LRK, the different model representations of isoprene-OA closely resembled the observed isoprene-OA to sulfate ratio of

15 0.83. IEPOX uptake alone resulted in a slope of 0.61 and IEPOX uptake along with semivolatile isoprene+OH products result in a slope of 0.79. The model showed only a slightly stronger relationship to sulfate than the observations (observed  $r = 0.87$ ) with the different model representations indistinguishable in their correlation with sulfate (model  $r = 0.93$  to  $0.95$ ). Similar to the model at the CTR site, CMAQ underpredicted sulfate at LRK by about 30%. IEPOX+SV isoprene OA was biased low by almost 40% and the bias in isoprene-OA (IEPOX+SV) was correlated with the bias in sulfate. ISOPOOH+IEPOX was underestimated

20 by 60% at LRK, in contrast to the CTR site where it was overestimated (supporting information). Thus, isoprene products in the model were too efficiently converted to SOA at LRK despite the low sulfate.

### 3.1.3 Total OA

Model predictions of OC, SOC, and POC were compared to network observations using the methods described in section 2.9 to determine how model errors in POA (specifically the nonvolatile assumption) could mask errors in SOA. An IMPROVE

25 network observation with a value of  $16.9 \mu\text{gCm}^{-3}$  (at SHM11, Shamrock Mine, CO) had a Cook's distance (Cook, 1977) much greater than 1 in a base model-observation comparison and was subsequently removed from all analysis. For the IMPROVE network, 86% of observed OC was predicted to be secondary in nature (equation 29) while CMAQ predicted 46% of OC was secondary. The ~~standard deviation (s) in model variability in~~ predicted SOA fraction (standard deviation, s, of 0.21) was much higher ~~at 0.21 vs 0.08 in observations than the variability in observed SOA fraction (s=0.08)~~. The CSN network (with a greater

30 proportion of urban sites) was slightly less secondary in nature with 79% of OC as SOC ( $s = 0.11$ ) and CMAQ predicting 40% of model OC as SOC ( $s = 0.19$ ). The SEARCH network was the most influenced by SOA of the three networks. SEARCH OC was predicted to be 88% SOC ( $s = 0.06$ ) while CMAQ indicated 58% SOC ( $s = 0.19$ ). PMF analysis at the urban JST site during summer 2011 and 2013 indicates that POA (HOA, BBOA, COA) factors accounted for 18-30% of total OA (Xu et al.,

2015a; Budisulistiorini et al., 2013), while CMAQ predicted a 42% contribution of POC to OC averaged across the urban and rural sites here.

Figure 7 indicates that overestimates in POC roughly compensated for underestimates in SOC in the updated CMAQ model. CMAQ predicted total OC was within 20% of average observed OC across each network. The normalized mean bias (NMB) for POC and SOC was much larger in magnitude than for total OC but relatively constant between networks. Specifically, SOC was low by 40% while POC was high by a factor of 1.7 to 1.8. The overestimate in model POC at the routine network locations was consistent with the model overestimate in AMS/ACSM-measured POA at SOAS CTR and LRK sites. Neither site resolved a hydrocarbon-like (HOA) type aerosol (Xu et al., 2015a; Budisulistiorini et al., 2015), indicating that POA from fossil fuel sources contributed less than 5% of total OA. A biomass burning (BBOA) type aerosol was resolved at the CTR site and episodic in nature. Comparing CMAQ predicted POA from all sources to the BBOA factor at CTR indicated CMAQ generally overestimated POA by a factor of 2, similar to the overestimate for network OC observations.

Additional insight into biases can be obtained by examining the diurnal profiles of OC (Figure 8). The diurnal profile of observed OC is relatively flat at the SEARCH sites, consistent with flat total OA (Xu et al., 2015b). CMAQ predictions had a pronounced diurnal profile with higher concentrations (and relatively good performance or overpredictions) at night and lower concentrations (coinciding with underestimates) during the day. Averaged across the two urban sites (JST and BHM), however, CMAQ showed no bias as a result of compensating diurnal and spatial errors. Rural OC (YRK and CTR) was underpredicted by about one third. Also included in Figure 8 is the diurnal profile of primary organic carbon (POC) in red dashes. Modeled POC at the Atlanta site correctly showed high concentrations in the morning (6am) and evening (7pm), but tended to peak several hours earlier than hydrocarbon-like organic aerosol (HOA) observed at JST in 2012 (Budisulistiorini et al., 2016). JST total model-predicted POC during morning and evening transition hours was roughly the same magnitude as total observed OC, further indicating CMAQ tends to overestimate primary organic aerosol.

## 3.2 Role of water

### 3.2.1 Effect on network OC

Figure 9 shows how including water interactions in absorptive partitioning calculations affected model ~~performance-compared to routine monitoring networks~~ predictions of OC at routine monitoring network locations. While including water associated with inorganic species (~~LLPS-ideal~~  $W_i$  simulation) in the partitioning medium for SOA decreased the bias in SOC for all networks, it led to small increases in the mean error. Except for the SEARCH network, including organic water ( $W_o > 0$ ) also reduced the mean bias at the expense of mean error. The simulation taking into account nonideality ( $\gamma \neq 1$ ) resulted in low normalized mean bias ( $\leq 10\%$ ) and large improvements in the mean bias compared to all other simulations. The mean error for  $\gamma \neq 1$  was marginally increased over the base simulation.

Figure 9 highlights that increases in bias occurred during the night (SEARCH network). The largest increases in bias occurred for the  $W_o > 0$  simulation as a result of a large contribution of organic water. Similar to the results for the CTR site (Section



3.2.3), daytime concentrations of SOC increased, but were still low compared to observations. In general, the variability in the bias increased as a result of water interactions while the mean bias decreased.

Some caution should be applied when comparing model predictions and observations. Measurements of total aerosol mass from IMPROVE and CSN networks are made under relative humidities of 30-50% and quartz filters for OC analysis from IMPROVE may be subject to ambient conditions in the field and during shipping before analysis (Solomon et al., 2014). Exposure to low RH could cause evaporation of reversible aqueous SOA (El-Sayed et al., 2016). Kim et al. (2015) have ~~indicated~~ reported the IMPROVE measurements of OC were 27% lower than colocated SEARCH measurements during the summer of 2013 ~~due to sampling artifacts~~, and hypothesized the difference to be due to evaporation from the IMPROVE filters during and after sampling. Episodic field campaign observations may be subject to sampling biases as well. ~~Generally, all Dryers are used~~ ahead of many online aerosol chemistry instruments, and most aerosol water is expected to evaporate in an aerodynamic lens inlet used on many instruments ~~(Zelenyuk et al., 2006), which~~ (Zelenyuk et al., 2006; Matthew et al., 2008). Such drying can cause changes in the aerosol phase state (Pajunoja et al., 2016) and could potentially lead to changes in partitioning of soluble organic compounds. El-Sayed et al. (2016) have reported a loss of WSOC after drying. Those authors used a post-drying residence time of 7 s, which is much longer than those used post-drying for the AMS in SOAS (approximately 1 s) and the time in the aerodynamic lens (approximately 0.01 s). A prior study reported that evaporation of ammonium nitrate, a water soluble and semivolatile species, was not observed when using post-drying residence times of about 1 s (Guo et al., 2016). While this topic should be subject to additional research, the AMS data in SOAS is unlikely to have significant biases due to this effect.

### 3.2.2 Frequency of phase separation

Figure 10a shows the June 2013 predicted average OM/OC across the model domain for the simulation in which phase separation and ideal interactions with inorganic water was predicted (~~LLPS~~ideal  $W_i$ ). Emitted POA in CMAQ has an OM/OC of 1.25 for vehicles, 1.7 for biomass burning, and 1.4 for other sources, and heterogeneous aging of the POA results in the OM/OC increasing with time (Simon and Bhawe, 2012). The urban sites of Birmingham, AL and Atlanta, GA had predicted OM/OC ratios between 1.3 and 2.2 with a mean of 1.8, while the rural SEARCH sites of Centreville, AL and Yorkville, GA had values between 1.7 and 2.2 with a mean of 1.9, consistent with previous work (Simon et al., 2011).

You et al. (2013) found that particles never undergo phase separation for OM/OC above 2.2 (O:C=0.8) and are always phase separated when OM/OC is less than 1.8 (O:C=0.5). Based on Figure 10b and equation 7, phase separation was a frequent, but not constant, occurrence. Phase separation was predicted to be more common in urban areas where OM/OC was low and near the Western portion of the domain where RH was low. Figure 10c shows RH, SRH, and phase separation for the CTR site. During the day, SRH decreased as a result of increasing OM/OC ratios for both SOA and POA. The increase in frequency of separation during the day was driven by low RH values during the day. At CTR, the highest frequency of phase separation ~~occurred~~ was predicted in the late morning. For other sites, separation was more frequent in the afternoon. These results demonstrate the complexity of aerosol phase behavior in the atmosphere, and this complexity impacts the way observations are collected and interpreted.

Model predicted RH was low compared to the observed RH by about 6% (mean bias). Since phase separation occurred when RH was below the SRH, the frequency of separation using model RH was biased high. In addition, since the model used the SRH predicted for ammonium sulfate, predictions further ~~represented~~represent an upper bound on the frequency of phase separation. Thus, particles should be internally mixed without phase separation more often than reported in this work.

- 5 As phase separation was most consistent with default model assumptions, parameterizing the SRH using data from another salt (and using observed RH) would only increase OA as a result of a greater frequency of inorganic water in the partitioning medium. ~~The LLPS simulation represents a lower bound on the effect of inorganic water on the partitioning medium for OA.~~

### 3.2.3 Effect of water on OA concentrations at CTR

- Figure 11 shows the influence of water on aerosols at the Centreville SOAS site during June 2013. The base simulation underestimated OA overall, but most substantially during the day. Including inorganic water in the partitioning medium when RH>SRH (~~LLPS simulation~~ideal  $W_i$ ) resulted in increased OA concentrations at all times of day. Reducing phase separation (~~as in LLPS under ideal conditions in ideal~~  $W_i$  compared to Base) has been shown to increase OA concentrations in box modeling (Topping et al., 2013). In CMAQ, concentrations of OA predicted in ~~LLPS~~ideal  $W_i$  were 1.5 times higher than observations at night when RH and aerosol liquid water concentrations were highest. Note that nocturnal mixing may be underestimated in the
- 15 model as indicated by low boundary layer depths, high monoterpene concentrations, and high  $\text{NO}_x$  concentrations compared to observations at night (Pye et al., 2015). The simulation considering uptake of water onto the organic phase ( $W_o > 0$ ) produced the highest predicted OA concentrations out of all simulations as a result of feedback in the model. Specifically, uptake of water and inclusion in the partitioning medium caused OA concentrations to increase, which further increased the amount of water in the particle and OA. Daytime OA predictions did not exceed observations, but nighttime model concentrations were
- 20 a factor of 2 higher than observed. A comparison of model-predicted aerosol water with observed aerosol water (Figure 11e) indicated that the model over-predicted aerosol LWC by 2-3x at night when interactions were ideal in the  $W_o > 0$  simulation.

- The simulation accounting for nonideality in addition to phase separation and uptake of water onto organic compounds ( $\gamma \neq 1$ ), produced results similar to the simulation considering phase separation and ideal interactions with inorganic water (~~LLPS only~~ (ideal  $W_i$ )) in terms of total OA as a function of time of day (model:observation correlation coefficient=0.5, NMB=10% ( $\gamma \neq 1$ ), 20% (~~LLPS~~ideal  $W_i$ )). However, the composition of the aerosol was different. Both simulations in which water interactions were ideal (~~LLPS~~ideal  $W_i$  and  $W_o > 0$ ) resulted in over-predictions of less oxidized oxygenated aerosol (LO-OOA) and particle-phase organic nitrates (supporting information). Even with the factor of 100 increase in Henry's law coefficient for monoterpene nitrates and factor of 10 decrease in activity coefficient implemented in  $\gamma \neq 1$  compared to *a priori* estimates, the predicted concentration of organic-nitrate derived SOA did not substantially change between the base and  $\gamma \neq 1$
- 30 simulation. The nonideality resulting from including water roughly compensated for the increase in partitioning medium in the case of organic nitrates.

### 3.2.4 Predicting water uptake onto organic compounds

All simulations indicated OM/OC ratios tend to peak during the day and were near a value of 2, consistent with observations (Figure 11c). Semivolatile SOA in the model tended to have lower OM/OC ratios than nonvolatile SOA, which resulted in lower OM/OC ratios overall in the sensitivity simulations compared to the base. These differences in OM/OC between the simulations propagated to predicted  $\kappa_{org}$  values (Figure 11d). The base simulation best agreed with the observationally constrained  $\kappa_{org}$  values of Cerully et al. (2015), but the model  $\kappa_{org}$  was biased low in all simulations.

Basing the  $\kappa$  values for organic species on OM/OC (or O:C) may tend to overestimate the  $\kappa$  values for organic nitrates (Suda et al., 2014). However, good agreement with the LO-OOA factor ( $\kappa=0.08\pm0.02$ , (Cerully et al., 2015)) is obtained for a 50/50 mixture of MTNO<sub>3</sub> and its hydrolysis product ( $\kappa=0.09$ ). The predicted monoterpene SOA  $\kappa$  (0.1) is in agreement with laboratory values ( $\kappa=0.03$  to 0.14 (Alfarra et al., 2013)). In addition, the  $\kappa$  for monoterpenes is higher than the  $\kappa$  for sesquiterpenes consistent with the trend (but not magnitude) in the work of Alfarra et al. (2013). The  $\kappa$  for IEPOX-derived OA (Table 2) was consistent with ~~Isoprene-OA~~ isoprene-OA value of Cerully et al. (2015) ( $\kappa=0.2\pm0.02$ ) for a 40% organosulfate, 60% 2-methyltetrol composition ( $\kappa=0.23$ ).

Figure 11e shows two observations of aerosol liquid water content compared to model predictions. In the model, aerosol LWC was represented as the sum of water due to inorganic species ( $W_i$ , referred to as inorganic water) and water due to organic species ( $W_o$ , referred to as organic water). The ~~LLPS-ideal~~ LLPS-ideal  $W_i$  and Base simulations resulted in the same predictions of aerosol water as only inorganic species were considered in calculating LWC. The difference between the Base simulation and observed LWC indicate a potential role for water associated with organic species. The contribution of LWC due to organic species has been estimated as 35% during SOAS with higher contributions (50%) at night (Guo et al., 2015). Both organic and inorganic water were predicted to be highest in concentration during the night or early morning as a result of the diurnal variation in RH.

Both simulations with uptake of water onto organic species ( $W_o > 0$  and  $\gamma \neq 1$ ) overpredicted LWC at night with the  $W_o > 0$  simulation resulting in greater overprediction as a result of the feedback mentioned earlier. Figure 11f attributes the overprediction in organic water for the  $\gamma \neq 1$  simulation to errors in the concentration of OA, hygroscopicity parameter for organic aerosol ( $\kappa_{org}$ ), and  $a_w$  (or RH) (equation 13). For simplicity in the attribution analysis, RH was converted to activity using a fixed particle diameter of 200 nm (Hu et al., 2016).  $W_o$  was not directly measured, but estimated using measured properties. Figure 11f indicates overestimates in the concentration of OA at night resulted in overestimates in  $W_o$ . Underestimates in RH and  $\kappa_{org}$  decreased the overestimate. Thus, predictions of aerosol water in the sensitivity simulations can be most improved by improving the concentration of OA in the model.

The concentration of organic water and contribution to total aerosol water is shown across the model domain in Figure 12.  $W_o$  was generally predicted to peak in the same locations where OA (Figure 12c) was high. This trend was not true in locations where RH drove higher or lower water uptake than expected or OA was dominated by fresh POA with low OM/OC. For example, high RH over the Great Lakes and off the Northeast Coast resulted in high concentrations of organic water. High concentrations of OA from fires in Colorado did not translate to high aerosol water as a result of low RH and low OM/OC ratios leading to low  $\kappa_{org}$ .  $\kappa_{org}$  was lower in urban areas as well (near 0.09) due to low OM/OC. Regionally,  $\kappa_{org}$  ranged between

0.11 and 0.14. The contribution to aerosol water resulting from organic vs. inorganic species (Figure 12b) reflected the ratio of organic-to-sulfate concentrations as aerosol water is proportional to their concentrations.

### 3.2.5 Model relationship to WSOC

The Particle-into-Liquid Sampler (PiLS) instrument used to measure  $\text{WSOC}_p$  adds an equivalent volume of water of  $6 \times 10^6$   $\mu\text{gm}^{-3}\text{air}$  which is significantly higher than the concentration of aerosol water observed during SOAS at CTR (less than 73  $\mu\text{gm}^{-3}$  (Nguyen et al., 2015b; Guo et al., 2015)). Figure 13a shows the fraction of particulate OA present in the aqueous (vs. insoluble) phase (equation 27). For the PiLS instrument during SOAS, compounds with  $\gamma_i^\infty < 100,000$  (solubilities as low as 0.1 g/L) were expected to be part of measured  $\text{WSOC}_p$ . Biogenic-VOC derived SOA was particularly soluble, except for potentially  $\text{MTNO}_3$ . Alkane and aromatic SOA had  $1,000 < \gamma_i^\infty < 100,000$  ( $0.1 < S < 10$ ), and thus, were less soluble. Note that none of the species have very low solubilities, so all SOA species were expected to be at least partially water-soluble during extraction depending on ambient conditions. Using the PiLS estimate of fraction water-soluble OA of 90% (Washenfelder et al., 2015), the mole-weighted  $\gamma_i^\infty$  for ambient OA was predicted (equation 27) to be 10,000,000, much higher than the coefficient predicted for any individual semivolatile constituent in the model.

The base simulation provided a good representation of  $\text{WSOC}_p$  at night, but underestimated total OC at all hours of the day, particularly during the daytime.  $\gamma \neq 1$  provided a better estimate of total OC, but overpredicted  $\text{WSOC}_p$  at night if compounds with  $\gamma^\infty < 1,000$  ( $S > 10$  g/L) were entirely considered WSOC. Recall that the *a priori* estimate of solubility for  $\text{MTNO}_3$  was increased by a factor of 100 to reconcile modeled and observed LO-OOA and particulate organic nitrate for  $\gamma \neq 1$ . Even with the factor of 100 increase in Henry's law,  $\text{MTNO}_3$  remained the least soluble biogenically-derived SOA species in the model. The large increase in OC for the nonideal simulation was a result of compounds with solubilities greater than 10 g/L or  $\gamma^\infty < 1,000$  (Figure 13c) which were dominated by traditional biogenic SOA and its accretion products. The accretion product from traditional semivolatile SOA is not well constrained in terms of its structure or volatility. In this work, as in the work of Carlton et al. (2010) and Pankow et al. (2015), the species was assumed nonvolatile with an OM/OC of 2 to 2.1. The solubility of low- $\text{NO}_x$  monoterpene-derived species remained above 10 g/L, even down to species with a saturation concentration of  $1 \times 10^{-10}$   $\mu\text{gm}^{-3}$  using Henry's law coefficient values from Hodzic et al. (2014). If the accretion products (AOLGB) were better represented by a less functionalized species and effectively insoluble, observation/model disagreement in  $\text{WSOC}_p$  in  $\gamma \neq 1$  would be reduced. Another way to reconcile observed and modeled  $\text{WSOC}_p$  may be to take into account deviations from equilibrium during PiLS extraction, which were not considered here.

Figure 14 shows observed water soluble organic carbon compounds in the gas phase ( $\text{WSOC}_g$ , measured by Mist Chamber and Total Carbon Analyzer (Hennigan et al., 2009)) compared to (a) semivolatile SOA precursors ([i.e. those associated with dry organic aerosol in Table 1](#)) and (b) semivolatile and aqueous SOA precursors currently in CMAQ. The figure indicates that considering semivolatile SOA precursors as the only source of  $\text{WSOC}_g$  in the model underestimated the daytime amount of  $\text{WSOC}_g$ , but that both observed  $\text{WSOC}_g$  and modeled semivolatile SOA precursors were on the same order of magnitude. Thus, the semivolatile surrogates in the model represented a significant pool of soluble gases. When IEPOX, glyoxal, and methylglyoxal were included in the model estimate of  $\text{WSOC}_g$ , the daytime  $\text{WSOC}_g$  was slightly overestimated. However,

given the factor of 2.4 overestimate in IEPOX+ISOPOOH in the model compared to observations (supporting information), the speciation of WSOC<sub>g</sub> differed in the model and observations. Figure 14 indicates that during the daytime, either additional water-soluble SOA precursors need to be implemented in the model or the model is correct and a significant portion of ambient WSOC<sub>g</sub> does not lead to SOA. Indeed, observed WSOC<sub>g</sub> may have large contributions from compounds such as formic acid  
5 that are not considered significant SOA constituents (Liu et al., 2012).

## 4 Conclusions

Current chemical transport models consider the dominant pathways to SOA to be dry processes governed by condensation of low-volatility organic compounds in the absence of water. In addition, models generally do not consider uptake of water by organic species. In this work, the CMAQ model was updated to consider aerosol water interactions with semivolatile SOA  
10 species and uptake of water onto OA with a focus on simulating conditions during the Southern Oxidant and Aerosol Study of 2013. A method ( $\gamma \neq 1$  simulation) was developed to take into account deviations from ideality using an activity coefficient calculated based on the species Henry's law coefficient, pure species saturation concentration ( $C_{0,i}^*$ ), and mole fraction water in the particle that resulted in a normalized mean bias of -4%, -10%, and -2% for IMPROVE, CSN, and SEARCH ~~WSOC~~.  
Monoterpene nitrates were predicted to be the least soluble semivolatile in the model, consistent with SOA yields from  $\beta$ -  
15 pinene+NO<sub>3</sub> being comparable under dry and humid conditions (Boyd et al., 2015). However, most biogenic hydrocarbon-derived semivolatile SOA was highly soluble and predicted to be measured as WSOC. Thus, even aerosol formed through dry processes in models may be classified as WSOC as measured by instruments such as the PiLS.

Based on current observations, aerosol water cannot be added to the partitioning medium for semivolatile organic compounds without simultaneously accounting for deviations in ideality. Otherwise, aerosol liquid water and aerosol carbon is overesti-  
20 mated at night. This finding is consistent with the work by Pun (2008) who found that aerosol water concentrations would more than double if ideality was assumed. Hodas et al. (2015) also found that organic-inorganic water-uptake experiments could not be modeled assuming ideal, well-mixed liquids, and assuming ideality overpredicted  $\alpha$ -pinene SOA concentrations by 100-200% in the work of Zuend and Seinfeld (2012).

All simulations in this work, including the more aggressive ones assuming ideality, could not reproduce daytime observed  
25 OA in the southeast US (at SEARCH sites) solely by adding water to the partitioning medium. Including water resulted in increased model error but could reduce the bias in OC. Additional pathways (new precursors and/or new pathways) to OA, particularly during the daytime, are still needed in models.

The updates described here are in three stages of model-readiness:

1. Properties of semivolatile OA constituents can immediately be updated in models to be consistent with their assumed  
30 volatility and parent hydrocarbon. Base model performance was good in terms of isoprene OA and total OC compared to routine networks. Property updates in this work (Table 2) are scheduled for public release as part of CMAQv5.2.
2. Prediction of organic water is more uncertain, but OM/OC is a useful proxy and can be used to parameterize water uptake onto organic species via equation 12 and  $\kappa$ -Köhler theory.

3. The effects of water on semivolatile OA partitioning requires additional research as deviations from ideality are important.  $\gamma_i^\infty$  or  $C_{H,i}^*$  are recommended as useful parameters for characterizing solubility. Models such as the Aerosol Inorganic-Organic Mixtures Functional groups Activity Coefficients (AIOMFAC) model (Zuend et al., 2008) and UMan-SysProp (Topping et al., 2016) offer opportunities to perform detailed calculations.
- 5 In addition, these areas of model improvement are suggested for future work:
  1. A treatment of semivolatile primary OA is needed to reproduce observed surrogates for POA. Factor of 2 overestimates in POA were predicted to compensate for underestimates in SOA on the order of 40% in IMPROVE and CSN networks.
  2. Improvements to sulfate and gas-phase isoprene chemistry will lead to an improved isoprene OA representation in models as isoprene OA is correlated with sulfate, but precursors to IEPOX-derived SOA were overestimated at CTR during SOAS. Predictions of isoprene SOA could be further improved by considering the volatility of IEPOX-derived species (such as 2-methyltetrols and C<sub>5</sub>-alkene triols) ([Isaacman-VanWertz et al., 2016](#)) as well as formation of additional species (Riedel et al., 2016).
  3. Model predicted aerosol LWC that includes water associated with organic compounds can most be improved by improving the concentration of OA which may require a number of updates in different areas.
  4. New precursors to SOA are likely needed, especially during the day when OA is underestimated and gas-phase semivolatile model species are less plentiful. Additional precursors for the isoprene system may include multifunctional hydroperoxides (Riva et al., 2016).

## 5 Data availability

~~CMAQv5.1~~ CMAQ is publicly available via github (<https://github.com/CMASCenterUSEPA/CMAQ/>) and the Community Modeling and Analysis System (CMAS) Center (<https://www.emascenter.org/emaq/>). ~~Property updates are scheduled for public release.~~ [Property updates will be available](#) as part of CMAQv5.2. SOAS field data is available from <http://esrl.noaa.gov/csd/groups/csd7/measurements/2013senex/>. [Code updates accounting for water interactions are available upon request.](#)

*Acknowledgements.* We thank CSC for emission processing and Shaojie Song for GEOS-Chem simulations. We thank Jesse Bash, Donna Schwede, and Matt Woody for useful discussion and Kirk Baker for developing the SOAS modeling platform. We thank William H. Brune, David O. Miller, Philip A. Feiner, and Li Zhang for providing OH data. We thank Paul Wennberg and Tran Nguyen for providing CTR CIMS data for IEPOX+ISOPOOH. We thank Rohit Mathur and Golam Sarwar for providing comments on the manuscript. The U.S. EPA through its Office of Research and Development supported the research described here. It has been subjected to Agency administrative review and approved for publication, but may not necessarily reflect official Agency policy. The Ng group was supported by NSF grant 1455588 and EPA grant RD-83540301. RW was supported by NSF grant 1242258. WWH and JLJ were supported by EPRI 10004734, NSF AGS-1360834

and EPA STAR 83587701-0. AGC was supported by EPA STAR grant R83512 and NSF-AGS 1242155. The Surratt group was supported by EPRI as well from EPA grant R835404 and NSF Grant CHE-1404644. ~~A.H. Goldstein the UC Berkeley team~~ The Goldstein team at UC Berkeley acknowledge support from EPA STAR Grant R835407 and NSF Grant AGS-1250569. ~~G.I.V.W.~~ GIVW is supported by the NSF Graduate Research Fellowship (#DGE 1106400).



## References

- Alfarra, M. R., Good, N., Wyche, K. P., Hamilton, J. F., Monks, P. S., Lewis, A. C., and McFiggans, G.: Water uptake is independent of the inferred composition of secondary aerosols derived from multiple biogenic VOCs, *Atmos. Chem. Phys.*, 13, 11 769–11 789, doi:10.5194/acp-13-11769-2013, 2013.
- 5 Altieri, K. E., Seitzinger, S. P., Carlton, A. G., Turpin, B. J., Klein, G. C., and Marshall, A. G.: Oligomers formed through in-cloud methylglyoxal reactions: Chemical composition, properties, and mechanisms investigated by ultra-high resolution FT-ICR mass spectrometry, *Atmos. Environ.*, 42, 1476–1490, doi:10.1016/j.atmosenv.2007.11.015, 2008.
- Appel, K. W., Napelenok, S. L., Foley, K. M., Pye, H. O. T., Hogrefe, C., Luecken, D. J., Bash, J. O., Roselle, S. J., Pleim, J. E., Foroutan, H., Hutzell, W. T., Pouliot, G. A., Sarwar, G., Fahey, K. M., Gantt, B., Gilliam, R. C., Kang, D., Mathur, R., Schwede, D. B., Spero, T. L.,
- 10 Wong, D. C., and Young, J. O.: Overview and evaluation of the Community Multiscale Air Quality (CMAQ) model version 5.1, *Geosci. Model Dev. Discuss.*, in review, doi:10.5194/gmd-2016-226, 2016.
- Appel, K. W., Napelenok, S., Foley, K. M., Pye, H. O. T., Luecken, D., Bash, J. O., Roselle, S. J., Pleim, J. E., Foroutan, H., and Hutzell, W. T.: Overview and evaluation of the Community Multiscale Air Quality (CMAQ) model version 5.1, in preparation.
- Baker, K. R., Carlton, A. G., Kleindienst, T. E., Offenberg, J. H., Beaver, M. R., Gentner, D. R., Goldstein, A. H., Hayes, P. L., Jimenez, J. L.,
- 15 Gilman, J. B., de Gouw, J. A., Woody, M. C., Pye, H. O. T., Kelly, J. T., Lewandowski, M., Jaoui, M., Stevens, P. S., Brune, W. H., Lin, Y. H., Rubitschun, C. L., and Surratt, J. D.: Gas and aerosol carbon in California: comparison of measurements and model predictions in Pasadena and Bakersfield, *Atmos. Chem. Phys.*, 15, 5243–5258, doi:10.5194/acp-15-5243-2015, 2015.
- Bash, J. O., Baker, K. R., and Beaver, M. R.: Evaluation of improved land use and canopy representation in BEIS v3.61 with biogenic VOC measurements in California, *Geosci. Model Dev.*, 9, 2191–2207, doi:10.5194/gmd-9-2191-2016, 2016.
- 20 Bertram, A. K., Martin, S. T., Hanna, S. J., Smith, M. L., Bodsworth, A., Chen, Q., Kuwata, M., Liu, A., You, Y., and Zorn, S. R.: Predicting the relative humidities of liquid-liquid phase separation, efflorescence, and deliquescence of mixed particles of ammonium sulfate, organic material, and water using the organic-to-sulfate mass ratio of the particle and the oxygen-to-carbon elemental ratio of the organic component, *Atmos. Chem. Phys.*, 11, 10995–11 006, doi:10.5194/acp-11-10995-2011, 2011.
- Boyd, C. M., Sanchez, J., Xu, L., Eugene, A. J., Nah, T., Tuet, W. Y., Guzman, M. I., and Ng, N. L.: Secondary organic aerosol formation
- 25 from the  $\beta$ -pinene+NO<sub>3</sub> system: effect of humidity and peroxy radical fate, *Atmos. Chem. Phys.*, 15, 7497–7522, doi:10.5194/acp-15-7497-2015, 2015.
- Budisulistiorini, S. H., Canagaratna, M. R., Croteau, P. L., Marth, W. J., Baumann, K., Edgerton, E. S., Shaw, S. L., Knipping, E., Worsnop, D. R., Jayne, J. T., Gold, A., and Surratt, J. D.: Real-time continuous characterization of secondary organic aerosol derived from isoprene epoxydiols (IEPOX) in downtown Atlanta, Georgia, using the Aerodyne Aerosol Chemical Speciation Monitor (ACSM), *Environ. Sci.*
- 30 *Technol.*, 47, 5686–5694, doi:10.1021/es400023n, 2013.
- Budisulistiorini, S. H., Li, X., Bairai, S. T., Renfro, J., Liu, Y., Liu, Y. J., McKinney, K. A., Martin, S. T., McNeill, V. F., Pye, H. O. T., Nenes, A., Neff, M. E., Stone, E. A., Mueller, S., Knote, C., Shaw, S. L., Zhang, Z., Gold, A., and Surratt, J. D.: Examining the effects of anthropogenic emissions on isoprene-derived secondary organic aerosol formation during the 2013 Southern Oxidant and Aerosol Study (SOAS) at the Look Rock, Tennessee ground site, *Atmos. Chem. Phys.*, 15, 8871–8888, doi:10.5194/acp-15-8871-2015, 2015.
- 35 Budisulistiorini, S. H., Baumann, K., Edgerton, E. S., Bairai, S. T., Mueller, S., Shaw, S. L., Knipping, E. M., Gold, A., and Surratt, J. D.: Seasonal characterization of submicron aerosol chemical composition and organic aerosol sources in the southeastern United States: Atlanta, Georgia, and Look Rock, Tennessee, *Atmos. Chem. Phys.*, 16, 5171–5189, doi:10.5194/acp-16-5171-2016, 2016.

- Canagaratna, M. R., Jimenez, J. L., Kroll, J. H., Chen, Q., Kessler, S. H., Massoli, P., Hildebrandt Ruiz, L., Fortner, E., Williams, L. R., Wilson, K. R., Surratt, J. D., Donahue, N. M., Jayne, J. T., and Worsnop, D. R.: Elemental ratio measurements of organic compounds using aerosol mass spectrometry: characterization, improved calibration, and implications, *Atmos. Chem. Phys.*, 15, 253–272, doi:10.5194/acp-15-253-2015, 2015.
- 5 Carlton, A. G. and Baker, K. R.: Photochemical modeling of the Ozark isoprene volcano: MEGAN, BEIS, and their impacts on air quality predictions, *Environ. Sci. Technol.*, 45, 4438–4445, doi:10.1021/es200050x, 2011.
- Carlton, A. G. and Turpin, B. J.: Particle partitioning potential of organic compounds is highest in the Eastern US and driven by anthropogenic water, *Atmos. Chem. Phys.*, 13, 10 203–10 214, doi:10.5194/acp-13-10203-2013, 2013.
- Carlton, A. G., Bhawe, P. V., Napelenok, S. L., Edney, E. D., Sarwar, G., Pinder, R. W., Pouliot, G. A., and Houyox, M.: Model representation  
 10 of secondary organic aerosol in CMAQv4.7, *Environ. Sci. Technol.*, 44, 8553–8560, doi:10.1021/es100636q, 2010.
- Cerully, K. M., Bougiatioti, A., Hite Jr, J. R., Guo, H., Xu, L., Ng, N. L., Weber, R., and Nenes, A.: On the link between hygroscopicity, volatility, and oxidation state of ambient and water-soluble aerosols in the southeastern United States, *Atmos. Chem. Phys.*, 15, 8679–8694, doi:10.5194/acp-15-8679-2015, 2015.
- Chan, A. W. H., Kautzman, K. E., Chhabra, P. S., Surratt, J. D., Chan, M. N., Crounse, J. D., Kurten, A., Wennberg, P. O., Flagan, R. C.,  
 15 and Seinfeld, J. H.: Secondary organic aerosol formation from photooxidation of naphthalene and alkylnaphthalenes: Implications for oxidation of intermediate volatility organic compounds (IVOCs), *Atmos. Chem. Phys.*, 9, 3049–3060, 2009.
- Chang, E. I. and Pankow, J. F.: Organic particulate matter formation at varying relative humidity using surrogate secondary and primary organic compounds with activity corrections in the condensed phase obtained using a method based on the Wilson equation, *Atmos. Chem. Phys.*, 10, 5475–5490, doi:10.5194/acp-10-5475-2010, 2010.
- 20 Chen, Q., Heald, C. L., Jimenez, J. L., Canagaratna, M. R., Zhang, Q., He, L.-Y., Huang, X.-F., Campuzano-Jost, P., Palm, B. B., Poulain, L., Kuwata, M., Martin, S. T., Abbatt, J. P. D., Lee, A. K. Y., and Liggitto, J.: Elemental composition of organic aerosol: The gap between ambient and laboratory measurements, *Geophys. Res. Lett.*, 42, 4182–4189, doi:10.1002/2015GL063693, 2015.
- Chung, S. H. and Seinfeld, J. H.: Global distribution and climate forcing of carbonaceous aerosols, *J. Geophys. Res.*, 107, doi:10.1029/2001jd001397, 2002.
- 25 Cook, R. D.: Detection of influential observation in linear regression, *Technometrics*, 19, 15–18, doi:10.2307/1268249, 1977.
- Donahue, N. M., Epstein, S. A., Pandis, S. N., and Robinson, A. L.: A two-dimensional volatility basis set: 1. organic-aerosol mixing thermodynamics, *Atmos. Chem. Phys.*, 11, 3303–3318, doi:10.5194/acp-11-3303-2011, 2011.
- Duplissy, J., DeCarlo, P. F., Dommen, J., Alfarra, M. R., Metzger, A., Barmapadimos, I., Prevot, A. S. H., Weingartner, E., Tritscher, T., Gysel, M., Aiken, A. C., Jimenez, J. L., Canagaratna, M. R., Worsnop, D. R., Collins, D. R., Tomlinson, J., and Baltensperger, U.:  
 30 Relating hygroscopicity and composition of organic aerosol particulate matter, *Atmos. Chem. Phys.*, 11, 1155–1165, doi:10.5194/acp-11-1155-2011, 2011.
- Eddingsaas, N. C., VanderVelde, D. G., and Wennberg, P. O.: Kinetics and products of the acid-catalyzed ring-opening of atmospherically relevant butyl epoxy alcohols, *J. Phys. Chem. A*, 114, 8106–8113, doi:10.1021/jp103907c, 2010.
- Edney, E. O., Driscoll, D. J., Speer, R. E., Weathers, W. S., Kleindienst, T. E., Li, W., and Smith, D. F.: Impact of aerosol liquid water  
 35 on secondary organic aerosol yields of irradiated toluene/propylene/ $\text{NO}_x$ / $(\text{NH}_4)_2\text{SO}_4$ /air mixtures, *Atmos. Environ.*, 34, 3907–3919, doi:10.1016/S1352-2310(00)00174-6, 2000.
- El-Sayed, M. M. H., Wang, Y., and Hennigan, C. J.: Direct atmospheric evidence for the irreversible formation of aqueous secondary organic aerosol, *Geophys. Res. Lett.*, 42, 5577–5586, doi:10.1002/2015GL064556, 2015.

- El-Sayed, M. M. H., Amenumey, D., and Hennigan, C. J.: Drying-induced evaporation of secondary organic aerosol during summer, *Environ. Sci. Technol.*, 50, 3626–3633, doi:10.1021/acs.est.5b06002, 2016.
- Ervens, B., Turpin, B. J., and Weber, R. J.: Secondary organic aerosol formation in cloud droplets and aqueous particles (aqSOA): a review of laboratory, field and model studies, *Atmos. Chem. Phys.*, 11, 11 069–11 102, doi:10.5194/acp-11-11069-2011, 2011.
- 5 Feiner, P. A., Brune, W. H., Miller, D. O., Zhang, L., Cohen, R. C., Romer, P. S., Goldstein, A. H., Keutsch, F. N., Skog, K. M., Wennberg, P. O., Nguyen, T. B., Teng, A. P., DeGouw, J., Koss, A., Wild, R. J., Brown, S. S., Guenther, A., Edgerton, E., Baumann, K., and Fry, J. L.: Testing atmospheric oxidation in an Alabama forest, *J. of the Atmos. Sci.*, 73, 4699–4710, doi:10.1175/JAS-D-16-0044.1, 2016.
- Feiner, P. A., Brune, W. H., Miller, D. O., Zhang, L., Cohen, R. C., Romer, P. S., Goldstein, A. H., Keutsch, F. N., Skog, K. M., Wennberg, P. O., Nguyen, T. B., Teng, A. P., DeGouw, J. A., Koss, A., Wild, R. J., Brown, S., Guenther, A., Edgerton, E., Baumann, K., and Fry, J. L.: Testing atmospheric oxidation in an Alabama forest, submitted.
- 10 Fisher, J. A., Jacob, D. J., Travis, K. R., Kim, P. S., Marais, E. A., Chan Miller, C., Yu, K., Zhu, L., Yantosca, R. M., Sulprizio, M. P., Mao, J., Wennberg, P. O., Crounse, J. D., Teng, A. P., Nguyen, T. B., St. Clair, J. M., Cohen, R. C., Romer, P., Nault, B. A., Wooldridge, P. J., Jimenez, J. L., Campuzano-Jost, P., Day, D. A., Hu, W., Shepson, P. B., Xiong, F., Blake, D. R., Goldstein, A. H., Misztal, P. K., Hanisco, T. F., Wolfe, G. M., Ryerson, T. B., Wisthaler, A., and Mikoviny, T.: Organic nitrate chemistry and its implications for nitrogen budgets in an isoprene- and monoterpene-rich atmosphere: constraints from aircraft (SEAC4RS) and ground-based (SOAS) observations in the Southeast US, *Atmos. Chem. Phys.*, 16, 5969–5991, doi:10.5194/acp-16-5969-2016, 2016.
- 15 Fountoukis, C. and Nenes, A.: ISORROPIA II: a computationally efficient thermodynamic equilibrium model for  $\text{K}^+$ - $\text{Ca}^{2+}$ - $\text{Mg}^{2+}$ - $\text{NH}_4^+$ - $\text{Na}^+$ - $\text{SO}_4^{2-}$ - $\text{NO}_3^-$ - $\text{Cl}^-$ - $\text{H}_2\text{O}$  aerosols, *Atmos. Chem. Phys.*, 7, 4639–4659, 2007.
- Griffin, R., Nguyen, K., Dabdub, D., and Seinfeld, J.: A coupled hydrophobic-hydrophilic model for predicting secondary organic aerosol formation, *J. Atmos. Chem.*, 44, 171–190, doi:10.1023/A:1022436813699, 2003.
- 20 Guo, H., Xu, L., Bougiatioti, A., Cerully, K. M., Capps, S. L., Hite Jr, J. R., Carlton, A. G., Lee, S. H., Bergin, M. H., Ng, N. L., Nenes, A., and Weber, R. J.: Fine-particle water and pH in the southeastern United States, *Atmos. Chem. Phys.*, 15, 5211–5228, doi:10.5194/acp-15-5211-2015, 2015.
- Guo, H., Sullivan, A. P., Campuzano-Jost, P., Schroder, J. C., Lopez-Hilfiker, F. D., Dibb, J. E., Jimenez, J. L., Thornton, J. A., Brown, S. S., Nenes, A., and Weber, R. J.: Fine particle pH and the partitioning of nitric acid during winter in the northeastern United States, *J. Geophys. Res. Atmos.*, 121, 10,355–10,376, doi:10.1002/2016JD025311, 2016.
- 25 Hennigan, C. J., Bergin, M. H., and Weber, R. J.: Correlations between water-soluble organic aerosol and water vapor: a synergistic effect from biogenic emissions?, *Environ. Sci. Technol.*, 42, 9079–9085, doi:10.1021/es802189y, 2008.
- Hennigan, C. J., Bergin, M. H., Russell, A. G., Nenes, A., and Weber, R. J.: Gas/particle partitioning of water-soluble organic aerosol in Atlanta, *Atmos. Chem. Phys.*, 9, 3613–3628, doi:10.5194/acp-9-3613-2009, 2009.
- 30 Hodas, N., Zuend, A., Mui, W., Flagan, R. C., and Seinfeld, J. H.: Influence of particle-phase state on the hygroscopic behavior of mixed organic-inorganic aerosols, *Atmos. Chem. Phys.*, 15, 5027–5045, doi:10.5194/acp-15-5027-2015, 2015.
- Hodzic, A., Aumont, B., Knote, C., Lee-Taylor, J., Madronich, S., and Tyndall, G.: Volatility dependence of Henry’s law constants of condensable organics: Application to estimate depositional loss of secondary organic aerosols, *Geophys. Res. Lett.*, 41, 2014GL060 649, doi:10.1002/2014GL060649, 2014.
- 35 Hu, W., Palm, B. B., Day, D. A., Campuzano-Jost, P., Krechmer, J. E., Peng, Z., de Sá, S. S., Martin, S. T., Alexander, M. L., Baumann, K., Hacker, L., Kiendler-Scharr, A., Koss, A. R., de Gouw, J. A., Goldstein, A. H., Seco, R., Sjostedt, S. J., Park, J. H., Guenther, A. B., Kim, S., Canonaco, F., Prévôt, Brune, W. H., and Jimenez, J. L.: Volatility and lifetime against OH heterogeneous reaction of ambient Isoprene

- Epoxydiols-Derived Secondary Organic Aerosol (IEPOX-SOA), *Atmos. Chem. Phys. Discuss.*, 2016, 1–35, doi:10.5194/acp-2016-418, 2016.
- Hu, W. W., Campuzano-Jost, P., Palm, B. B., Day, D. A., Ortega, A. M., Hayes, P. L., Krechmer, J. E., Chen, Q., Kuwata, M., Liu, Y. J., de Sá, S. S., McKinney, K., Martin, S. T., Hu, M., Budisulistiorini, S. H., Riva, M., Surratt, J. D., St. Clair, J. M., Isaacman-Van Wertz, G., Yee, L. D., Goldstein, A. H., Carbone, S., Brito, J., Artaxo, P., de Gouw, J. A., Koss, A., Wisthaler, A., Mikoviny, T., Karl, T., Kaser, L., Jud, W., Hansel, A., Docherty, K. S., Alexander, M. L., Robinson, N. H., Coe, H., Allan, J. D., Canagaratna, M. R., Paulot, F., and Jimenez, J. L.: Characterization of a real-time tracer for isoprene epoxydiols-derived secondary organic aerosol (IEPOX-SOA) from aerosol mass spectrometer measurements, *Atmos. Chem. Phys.*, 15, 11 807–11 833, doi:10.5194/acp-15-11807-2015, 2015.
- Isaacman, G., Kreisberg, N. M., Yee, L. D., Worton, D. R., Chan, A. W. H., Moss, J. A., Hering, S. V., and Goldstein, A. H.: Online derivatization for hourly measurements of gas- and particle-phase semi-volatile oxygenated organic compounds by thermal desorption aerosol gas chromatography (SV-TAG), *Atmos. Meas. Tech.*, 7, 4417–4429, doi:10.5194/amt-7-4417-2014, 2014.
- Isaacman-VanWertz, G., Yee, L. D., Kreisberg, N. M., Wernis, R., Moss, J. A., Hering, S. V., de Sá, S. S., Martin, S. T., Alexander, M. L., Palm, B. B., Hu, W., Campuzano-Jost, P., Day, D. A., Jimenez, J. L., Riva, M., Surratt, J. D., Viegas, J., Manzi, A., Edgerton, E., Baumann, K., Souza, R., Artaxo, P., and Goldstein, A. H.: Ambient Gas-Particle Partitioning of Tracers for Biogenic Oxidation, *Environ. Sci. Technol.*, 50, 9952–9962, doi:10.1021/acs.est.6b01674, 2016.
- Jathar, S. H., Mahmud, A., Barsanti, K. C., Asher, W. E., Pankow, J. F., and Kleeman, M. J.: Water uptake by organic aerosol and its influence on gas/particle partitioning of secondary organic aerosol in the United States, *Atmos. Environ.*, 129, 142–154, doi:10.1016/j.atmosenv.2016.01.001, 2016.
- Jimenez, J. L., Canagaratna, M. R., Donahue, N. M., Prevot, A. S. H., Zhang, Q., Kroll, J. H., DeCarlo, P. F., Allan, J. D., Coe, H., Ng, N. L., Aiken, A. C., Docherty, K. S., Ulbrich, I. M., Grieshop, A. P., Robinson, A. L., Duplissy, J., Smith, J. D., Wilson, K. R., Lanz, V. A., Hueglin, C., Sun, Y. L., Tian, J., Laaksonen, A., Raatikainen, T., Rautiainen, J., Vaattovaara, P., Ehn, M., Kulmala, M., Tomlinson, J. M., Collins, D. R., Cubison, M. J., Dunlea, J., Huffman, J. A., Onasch, T. B., Alfarra, M. R., Williams, P. I., Bower, K., Kondo, Y., Schneider, J., Drewnick, F., Borrmann, S., Weimer, S., Demerjian, K., Salcedo, D., Cottrell, L., Griffin, R., Takami, A., Miyoshi, T., Hatakeyama, S., Shimojo, A., Sun, J. Y., Zhang, Y. M., Dzepina, K., Kimmel, J. R., Sueper, D., Jayne, J. T., Herndon, S. C., Trimborn, A. M., Williams, L. R., Wood, E. C., Middlebrook, A. M., Kolb, C. E., Baltensperger, U., and Worsnop, D. R.: Evolution of organic aerosols in the atmosphere, *Science*, 326, 1525–1529, doi:10.1126/science.1180353, 2009.
- Kampf, C. J., Waxman, E. M., Slowik, J. G., Dommen, J., Pfaffenberger, L., Praplan, A. P., Prévôt, A. S. H., Baltensperger, U., Hoffmann, T., and Volkamer, R.: Effective Henry’s Law Partitioning and the Salting Constant of Glyoxal in Aerosols Containing Sulfate, *Environ. Sci. Technol.*, 47, 4236–4244, doi:10.1021/es400083d, 2013.
- Kim, P. S., Jacob, D. J., Fisher, J. A., Travis, K., Yu, K., Zhu, L., Yantosca, R. M., Sulprizio, M. P., Jimenez, J. L., Campuzano-Jost, P., Froyd, K. D., Liao, J., Hair, J. W., Fenn, M. A., Butler, C. F., Wagner, N. L., Gordon, T. D., Welti, A., Wennberg, P. O., Crounse, J. D., St. Clair, J. M., Teng, A. P., Millet, D. B., Schwarz, J. P., Markovic, M. Z., and Perring, A. E.: Sources, seasonality, and trends of southeast US aerosol: an integrated analysis of surface, aircraft, and satellite observations with the GEOS-Chem chemical transport model, *Atmos. Chem. Phys.*, 15, 10411–10433, doi:10.5194/acp-15-10411-2015, 2015.
- Kondo, Y., Miyazaki, Y., Takegawa, N., Miyakawa, T., Weber, R. J., Jimenez, J. L., Zhang, Q., and Worsnop, D. R.: Oxygenated and water-soluble organic aerosols in Tokyo, *J. Geophys. Res.*, 112, n/a–n/a, doi:10.1029/2006JD007056, 2007.
- Koo, B., Knipping, E., and Yarwood, G.: 1.5-Dimensional volatility basis set approach for modeling organic aerosol in CAMx and CMAQ, *Atmos. Environ.*, 95, 158–164, doi:10.1016/j.atmosenv.2014.06.031, 2014.

- Lambe, A. T., Onasch, T. B., Massoli, P., Croasdale, D. R., Wright, J. P., Ahern, A. T., Williams, L. R., Worsnop, D. R., Brune, W. H., and Davidovits, P.: Laboratory studies of the chemical composition and cloud condensation nuclei (CCN) activity of secondary organic aerosol (SOA) and oxidized primary organic aerosol (OPOA), *Atmos. Chem. Phys.*, 11, 8913–8928, doi:10.5194/acp-11-8913-2011, 2011.
- Liggio, J., Li, S.-M., and McLaren, R.: Reactive uptake of glyoxal by particulate matter, *J. Geophys. Res.*, 110, D10304, doi:10.1029/2004jd005113, 2005.
- Lin, Y.-H., Zhang, Z., Docherty, K. S., Zhang, H., Budisulistiorini, S. H., Rubitschun, C. L., Shaw, S. L., Knipping, E. M., Edgerton, E. S., Kleindienst, T. E., Gold, A., and Surratt, J. D.: Isoprene epoxydiols as precursors to secondary organic aerosol formation: Acid-catalyzed reactive uptake studies with authentic compounds, *Environ. Sci. Technol.*, 46, 250–8, 2012.
- Liu, J., Zhang, X., Parker, E. T., Veres, P. R., Roberts, J. M., de Gouw, J. A., Hayes, P. L., Jimenez, J. L., Murphy, J. G., Ellis, R. A., Huey, L. G., and Weber, R. J.: On the gas-particle partitioning of soluble organic aerosol in two urban atmospheres with contrasting emissions: 2. Gas and particle phase formic acid, *J. Geophys. Res.*, 117, n/a–n/a, doi:10.1029/2012JD017912, 2012.
- Liu, Y., Kuwata, M., Strick, B. F., Geiger, F. M., Thomson, R. J., McKinney, K. A., and Martin, S. T.: Uptake of epoxydiol isomers accounts for half of the particle-phase material produced from isoprene photooxidation via the HO<sub>2</sub> pathway, *Environ. Sci. Technol.*, 49, 250–258, doi:10.1021/es5034298, 2015.
- Lopez-Hilfiker, F. D., Mohr, C., D'Ambro, E. L., Lutz, A., Riedel, T. P., Gaston, C. J., Iyer, S., Zhang, Z., Gold, A., Surratt, J. D., Lee, B. H., Kurten, T., Hu, W. W., Jimenez, J., Hallquist, M., and Thornton, J. A.: Molecular composition and volatility of organic aerosol in the southeastern U.S.: implications for IEPOX derived SOA, *Environ. Sci. Technol.*, 50, 2200–2209, doi:10.1021/acs.est.5b04769, 2016.
- Lowenthal, D. H. and Kumar, N.: Evaluation of the IMPROVE equation for estimating aerosol light extinction, *J. Air Waste Manag. Assoc.*, pp. null–null, doi:10.1080/10962247.2016.1178187, 2016.
- Mackay, D., Ma, K.-C., and Shiu, W.-Y.: *Illustrated Handbook of Physical-Chemical Properties and Environmental Fate for Organic Chemicals Vol. 3*, Lewis Publishers, United States, 1993.
- Marais, E. A., Jacob, D. J., Jimenez, J. L., Campuzano-Jost, P., Day, D. A., Hu, W., Krechmer, J., Zhu, L., Kim, P. S., Miller, C. C., Fisher, J. A., Travis, K., Yu, K., Hanisco, T. F., Wolfe, G. M., Arkinson, H. L., Pye, H. O. T., Froyd, K. D., Liao, J., and McNeill, V. F.: Aqueous-phase mechanism for secondary organic aerosol formation from isoprene: application to the southeast United States and co-benefit of SO<sub>2</sub> emission controls, *Atmos. Chem. Phys.*, 16, 1603–1618, doi:10.5194/acp-16-1603-2016, 2016.
- Matthew, B. M., Middlebrook, A. M., and Onasch, T. B.: Collection efficiencies in an Aerodyne aerosol mass spectrometer as a function of particle phase for laboratory generated aerosols, *Aerosol Science and Technology*, 42, 884–898, doi:10.1080/02786820802356797, 2008.
- May, A. A., Presto, A. A., Hennigan, C. J., Nguyen, N. T., Gordon, T. D., and Robinson, A. L.: Gas-particle partitioning of primary organic aerosol emissions: (1) Gasoline vehicle exhaust, *Atmos. Environ.*, 77, 128–139, doi:10.1016/j.atmosenv.2013.04.060, 2013.
- Misztal, P. K., Guenther, A., and Goldstein, A. H.: Flux observations of isoprene oxidation products above forests point to potential role of leaf-surface reactions, in preparation.
- Ng, N. L., Kroll, J. H., Chan, A. W. H., Chhabra, P. S., Flagan, R. C., and Seinfeld, J. H.: Secondary organic aerosol formation from m-xylene, toluene, and benzene, *Atmos. Chem. Phys.*, 7, 3909–3922, 2007.
- Nguyen, T. B., Coggon, M. M., Bates, K. H., Zhang, X., Schwantes, R. H., Schilling, K. A., Loza, C. L., Flagan, R. C., Wennberg, P. O., and Seinfeld, J. H.: Organic aerosol formation from the reactive uptake of isoprene epoxydiols (IEPOX) onto non-acidified inorganic seeds, *Atmos. Chem. Phys.*, 14, 3497–3510, doi:10.5194/acp-14-3497-2014, 2014a.
- Nguyen, T. B., Crounse, J. D., Teng, A. P., St. Clair, J. M., Paulot, F., Wolfe, G. M., and Wennberg, P. O.: Rapid deposition of oxidized biogenic compounds to a temperate forest, *Proc. Natl. Acad. Sci. U. S. A.*, 112, E392–E401, doi:10.1073/pnas.1418702112, 2015a.

- Nguyen, T. K. V., Petters, M. D., Suda, S. R., Guo, H., Weber, R. J., and Carlton, A. G.: Trends in particle-phase liquid water during the Southern Oxidant and Aerosol Study, *Atmos. Chem. Phys.*, 14, 10911–10930, doi:10.5194/acp-14-10911-2014, 2014b.
- Nguyen, T. K. V., Capps, S. L., and Carlton, A. G.: Decreasing aerosol water is consistent with OC trends in the southeast U.S, *Environ. Sci. Technol.*, 49, 7843–7850, doi:10.1021/acs.est.5b00828, 2015b.
- 5 Nguyen, T. K. V., Zhang, Q., Jimenez, J. L., Pike, M., and Carlton, A. G.: Liquid water: ubiquitous contributor to aerosol mass, *Environ. Sci. Technol. Lett.*, doi:10.1021/acs.estlett.6b00167, 2016.
- Novakov, T. and Penner, J. E.: Large contribution of organic aerosols to cloud-condensation-nuclei concentrations, *Nature*, 365, 823–826, 1993.
- Odum, J. R., Hoffmann, T., Bowman, F., Collins, D., Flagan, R. C., and Seinfeld, J. H.: Gas/particle partitioning and secondary organic aerosol yields, *Environ. Sci. Technol.*, 30, 2580–2585, doi:10.1021/es950943+, 1996.
- 10 Pajunoja, A., Lambe, A. T., Hakala, J., Rastak, N., Cummings, M. J., Brogan, J. F., Hao, L. Q., Paramonov, M., Hong, J., Prisle, N. L., Malila, J., Romakkaniemi, S., Lehtinen, K. E. J., Laaksonen, A., Kulmala, M., Massoli, P., Onasch, T. B., Donahue, N. M., Riipinen, I., Davidovits, P., Worsnop, D. R., Petaja, T., and Virtanen, A.: Adsorptive uptake of water by semisolid secondary organic aerosols, *Geophys. Res. Lett.*, 42, 3063–3068, doi:10.1002/2015gl063142, 2015.
- 15 Pajunoja, A., Hu, W., Leong, Y. J., Taylor, N. F., Miettinen, P., Palm, B. B., Mikkonen, S., Collins, D. R., Jimenez, J. L., and Virtanen, A.: Phase state of ambient aerosol linked with water uptake and chemical aging in the Southeastern US, *Atmos. Chem. Phys. Discuss.*, 2016, 1–25, doi:10.5194/acp-2016-375, 2016.
- Pankow, J. F.: An absorption model of gas/particle partitioning of organic compounds in the atmosphere, *Atmos. Environ.*, 28, 185–188, doi:10.1016/1352-2310(94)90093-0, 1994.
- 20 Pankow, J. F. and Asher, W. E.: SIMPOL.1: a simple group contribution method for predicting vapor pressures and enthalpies of vaporization of multifunctional organic compounds, *Atmos. Chem. Phys.*, 8, 2773–2796, doi:10.5194/acp-8-2773-2008, 2008.
- Pankow, J. F. and Chang, E. I.: Variation in the sensitivity of predicted levels of atmospheric organic particulate matter (OPM), *Environ. Sci. Technol.*, 42, 7321–7329, doi:10.1021/es8003377, 2008.
- Pankow, J. F., Marks, M. C., Barsanti, K. C., Mahmud, A., Asher, W. E., Li, J., Ying, Q., Jathar, S. H., and Kleeman, M. J.: Molecular view modeling of atmospheric organic particulate matter: Incorporating molecular structure and co-condensation of water, *Atmos. Environ.*, 25, 122, 400–408, doi:10.1016/j.atmosenv.2015.10.001, 2015.
- Petters, M. D. and Kreidenweis, S. M.: A single parameter representation of hygroscopic growth and cloud condensation nucleus activity, *Atmos. Chem. Phys.*, 7, 1961–1971, doi:10.5194/acp-7-1961-2007, 2007.
- Piletic, I. R., Edney, E. O., and Bartolotti, L. J.: A computational study of acid catalyzed aerosol reactions of atmospherically relevant epoxides, *Phys. Chem. Chem. Phys.*, 15, 18065–18076, doi:10.1039/C3CP52851K, 2013.
- 30 Pleim, J. and Ran, L.: Surface flux modeling for air quality applications, *Atmosphere*, 2, 271–302, 2011.
- Psichoudaki, M. and Pandis, S. N.: Atmospheric aerosol water-soluble organic carbon measurement: a theoretical analysis, *Environ. Sci. Technol.*, 47, 9791–9798, doi:10.1021/es402270y, 2013.
- Pun, B. K.: Development and initial application of the sesquiversion of MADRID, *J. Geophys. Res.*, 113, doi:10.1029/2008JD009888, 2008.
- 35 Pun, B. K., Griffin, R. J., Seigneur, C., and Seinfeld, J. H.: Secondary organic aerosol 2. Thermodynamic model for gas/particle partitioning of molecular constituents, *J. Geophys. Res.*, 107, 4333, doi:10.1029/2001JD000542, 2002.
- Pye, H. O. T. and Pouliot, G. A.: Modeling the role of alkanes, polycyclic aromatic hydrocarbons, and their oligomers in secondary organic aerosol formation, *Environ. Sci. Technol.*, 46, 6041–6047, doi:10.1021/es300409w, 2012.

- Pye, H. O. T., Pinder, R. W., Piletic, I. R., Xie, Y., Capps, S. L., Lin, Y.-H., Surratt, J. D., Zhang, Z., Gold, A., Luecken, D. J., Hutzell, W. T., Jaoui, M., Offenberg, J. H., Kleindienst, T. E., Lewandowski, M., and Edney, E. O.: Epoxide pathways improve model predictions of isoprene markers and reveal key role of acidity in aerosol formation, *Environ. Sci. Technol.*, 47, 11 056–11 064, doi:10.1021/es402106h, 2013.
- 5 Pye, H. O. T., Luecken, D. J., Xu, L., Boyd, C. M., Ng, N. L., Baker, K. R., Ayres, B. R., Bash, J. O., Baumann, K., Carter, W. P. L., Edgerton, E., Fry, J. L., Hutzell, W. T., Schwede, D. B., and Shepson, P. B.: Modeling the current and future roles of particulate organic nitrates in the southeastern United States, *Environ. Sci. Technol.*, 49, 14 195–14 203, doi:10.1021/acs.est.5b03738, 2015.
- Raatikainen, T., Vaattovaara, P., Tiitta, P., Miettinen, P., Rautiainen, J., Ehn, M., Kulmala, M., Laaksonen, A., and Worsnop, D. R.: Physico-chemical properties and origin of organic groups detected in boreal forest using an aerosol mass spectrometer, *Atmos. Chem. Phys.*, 10, 2063–2077, doi:10.5194/acp-10-2063-2010, 2010.
- 10 Raventos-Duran, T., Camredon, M., Valorso, R., Mouchel-Vallon, C., and Aumont, B.: Structure-activity relationships to estimate the effective Henry's law constants of organics of atmospheric interest, *Atmos. Chem. Phys.*, 10, 7643–7654, doi:10.5194/acp-10-7643-2010, 2010.
- Riedel, T. P., Lin, Y. H., Zhang, Z., Chu, K., Thornton, J. A., Vizuete, W., Gold, A., and Surratt, J. D.: Constraining condensed-phase formation kinetics of secondary organic aerosol components from isoprene epoxydiols, *Atmos. Chem. Phys.*, 16, 1245–1254, doi:10.5194/acp-16-1245-2016, 2016.
- 15 Riva, M., Budisulistiorini, S. H. H., Chen, Y., Zhang, Z., D'Ambro, E. L., Zhang, X., Gold, A., Turpin, B. J., Thornton, J. A., Canagaratna, M. R., and Surratt, J. D.: Chemical characterization of secondary organic aerosol from oxidation of isoprene hydroxyhydroperoxides, *Environ. Sci. Technol.*, doi:10.1021/acs.est.6b02511, 2016.
- 20 Ruthenburg, T. C., Perlin, P. C., Liu, V., McDade, C. E., and Dillner, A. M.: Determination of organic matter and organic matter to organic carbon ratios by infrared spectroscopy with application to selected sites in the IMPROVE network, *Atmos. Environ.*, 86, 47–57, doi:10.1016/j.atmosenv.2013.12.034, 2014.
- Saxena, P., Hildemann, L. M., McMurry, P. H., and Seinfeld, J. H.: Organics alter hygroscopic behavior of atmospheric particles, *J. Geophys. Res.*, 100, 18 755–18 770, doi:10.1029/95JD01835, 1995.
- 25 Schell, B., Ackermann, I. J., Hass, H., Binkowski, F. S., and Ebel, A.: Modeling the formation of secondary organic aerosol within a comprehensive air quality model system, *J. Geophys. Res.*, 106, 28 275–28 293, doi:10.1029/2001JD000384, 2001.
- Schnoor, J. L.: *Environmental modeling: fate and transport of pollutants in water, air, and soil*, John Wiley and Sons, 1996.
- Schwantes, R. H., Teng, A. P., Nguyen, T. B., Coggon, M. M., Crounse, J. D., St. Clair, J. M., Zhang, X., Schilling, K. A., Seinfeld, J. H., and Wennberg, P. O.: Isoprene NO<sub>3</sub> Oxidation Products from the RO<sub>2</sub> + HO<sub>2</sub> Pathway, *The Journal of Physical Chemistry A*, 119, 10 158–10 171, doi:10.1021/acs.jpca.5b06355, 2015.
- 30 Seinfeld, J. H. and Pandis, S. N.: *Atmospheric chemistry and physics : from air pollution to climate change*, J. Wiley, United States, 2006.
- Seinfeld, J. H., Erdakos, G. B., Asher, W. E., and Pankow, J. F.: Modeling the formation of secondary organic aerosol (SOA). 2. The predicted effects of relative humidity on aerosol formation in the  $\alpha$ -pinene-,  $\beta$ -pinene-, dabinene-,  $\Delta$ 3-carene-, and cyclohexene-ozone Systems, *Environ. Sci. Technol.*, 35, 1806–1817, doi:10.1021/es001765+, 2001.
- 35 Shiraiwa, M., Berkemeier, T., Schilling-Fahnestock, K. A., Seinfeld, J. H., and Pöschl, U.: Molecular corridors and kinetic regimes in the multiphase chemical evolution of secondary organic aerosol, *Atmos. Chem. Phys.*, 14, 8323–8341, doi:10.5194/acp-14-8323-2014, 2014.
- Simon, H. and Bhawe, P. V.: Simulating the degree of oxidation in atmospheric organic particles, *Environ. Sci. Technol.*, 46, 331–9, 2012.

- Simon, H., Bhave, P. V., Swall, J. L., Frank, N. H., and Malm, W. C.: Determining the spatial and seasonal variability in OM/OC ratios across the US using multiple regression, *Atmos. Chem. Phys.*, 11, 2933–2949, doi:10.5194/acp-11-2933-2011, 2011.
- Solomon, P. A., Crumpler, D., Flanagan, J. B., Jayanty, R. K. M., Rickman, E. E., and McDade, C. E.: US National PM<sub>2.5</sub> Chemical Speciation Monitoring Networks-CSN and IMPROVE: Description of networks, *J. Air Waste Manag. Assoc.*, 64, 1410–1438, doi:10.1080/10962247.2014.956904, 2014.
- 5 Song, M., Liu, P. F., Hanna, S. J., Li, Y. J., Martin, S. T., and Bertram, A. K.: Relative humidity-dependent viscosities of isoprene-derived secondary organic material and atmospheric implications for isoprene-dominant forests, *Atmos. Chem. Phys.*, 15, 5145–5159, doi:10.5194/acp-15-5145-2015, 2015.
- Su, L., Patton, E. G., Vilà-Guerau de Arellano, J., Guenther, A. B., Kaser, L., Yuan, B., Xiong, F., Shepson, P. B., Zhang, L., Miller, D. O., Brune, W. H., Baumann, K., Edgerton, E., Weinheimer, A., Misztal, P. K., Park, J. H., Goldstein, A. H., Skog, K. M., Keutsch, F. N., and Mak, J. E.: Understanding isoprene photooxidation using observations and modeling over a subtropical forest in the southeastern US, *Atmos. Chem. Phys.*, 16, 7725–7741, doi:10.5194/acp-16-7725-2016, 2016.
- 10 Suda, S. R., Petters, M. D., Yeh, G. K., Strollo, C., Matsunaga, A., Faulhaber, A., Ziemann, P. J., Prenni, A. J., Carrico, C. M., Sullivan, R. C., and Kreidenweis, S. M.: Influence of functional groups on organic aerosol cloud condensation nucleus activity, *Environ. Sci. Technol.*, 48, 10 182–10 190, doi:10.1021/es502147y, 2014.
- 15 Sullivan, A. P., Weber, R. J., Clements, A. L., Turner, J. R., Bae, M. S., and Schauer, J. J.: A method for on-line measurement of water-soluble organic carbon in ambient aerosol particles: Results from an urban site, *Geophys. Res. Lett.*, 31, n/a–n/a, doi:10.1029/2004GL019681, 2004.
- Surratt, J. D., Chan, A. W. H., Eddingsaas, N. C., Chan, M., Loza, C. L., Kwan, A. J., Hersey, S. P., Flagan, R. C., Wennberg, P. O., and Seinfeld, J. H.: Reactive intermediates revealed in secondary organic aerosol formation from isoprene, *Proc. Natl. Acad. Sci. U. S. A.*, 20 107, 6640–6645, doi:10.1073/pnas.0911114107, 2010.
- Topping, D., Barley, M., and McFiggans, G.: Including phase separation in a unified model to calculate partitioning of vapours to mixed inorganic-organic aerosol particles, *Faraday Discuss.*, 165, 273–288, doi:10.1039/C3FD00047H, 2013.
- Topping, D., Barley, M., Bane, M. K., Higham, N., Aumont, B., Dingle, N., and McFiggans, G.: UManSysProp v1.0: an online and open-source facility for molecular property prediction and atmospheric aerosol calculations, *Geosci. Model Dev.*, 9, 899–914, doi:10.5194/gmd-9-899-2016, 2016.
- 25 Vasilakos, P., Pye, H. O. T., Hu, Y., Xu, L., Guo, H., Bougiatioti, A., Cerully, K., Goldstein, A., Guenther, A., Ng, N. L., Surrat, J. D., Weber, R., Wennberg, P., Russell, A. R., and Nenes, A.: Constraining IEPOX and IEPOX-derived SOA formation in CMAQ with the use of SOAS observations, in preparation.
- 30 Washenfelder, R. A., Attwood, A. R., Brock, C. A., Guo, H., Xu, L., Weber, R. J., Ng, N. L., Allen, H. M., Ayres, B. R., Baumann, K., Cohen, R. C., Draper, D. C., Duffey, K. C., Edgerton, E., Fry, J. L., Hu, W. W., Jimenez, J. L., Palm, B. B., Romer, P., Stone, E. A., Wooldridge, P. J., and Brown, S. S.: Biomass burning dominates brown carbon absorption in the rural southeastern United States, *Geophys. Res. Lett.*, 42, 653–664, doi:10.1002/2014GL062444, 2015.
- Wong, J. P. S., Lee, A. K. Y., and Abbatt, J. P. D.: Impacts of sulfate seed acidity and water content on isoprene secondary organic aerosol formation, *Environ. Sci. Technol.*, 49, 13 215–13 221, doi:10.1021/acs.est.5b02686, 2015.
- 35 Xie, M., Hannigan, M. P., and Barsanti, K. C.: Gas/Particle Partitioning of 2-Methyltetrols and Levoglucosan at an Urban Site in Denver, *Environ. Sci. Technol.*, 48, 2835–2842, doi:10.1021/es405356n, 2014.



- Xu, L., Guo, H., Boyd, C. M., Klein, M., Bougiatioti, A., Cerully, K. M., Hite, J. R., Isaacman-VanWertz, G., Kreisberg, N. M., Knote, C., Olson, K., Koss, A., Goldstein, A. H., Hering, S. V., de Gouw, J., Baumann, K., Lee, S.-H., Nenes, A., Weber, R. J., and Ng, N. L.: Effects of anthropogenic emissions on aerosol formation from isoprene and monoterpenes in the southeastern United States, *Proc. Natl. Acad. Sci. U. S. A.*, 112, 37–42, doi:10.1073/pnas.1417609112, 2015a.
- 5 Xu, L., Suresh, S., Guo, H., Weber, R. J., and Ng, N. L.: Aerosol characterization over the southeastern United States using high-resolution aerosol mass spectrometry: spatial and seasonal variation of aerosol composition and sources with a focus on organic nitrates, *Atmos. Chem. Phys.*, 15, 7307–7336, doi:10.5194/acp-15-7307-2015, 2015b.
- Xu, L., Guo, H., Weber, R., and Ng, N. L.: Chemical characterization of water soluble organic aerosol in contrasting rural and urban environments in the southeastern United States, in preparation.
- 10 Ye, J., Gordon, C. A., and Chan, A. W. H.: Enhancement in secondary organic aerosol formation in the presence of preexisting organic particle, *Environ. Sci. Technol.*, 50, 3572–3579, doi:10.1021/acs.est.5b05512, 2016.
- Ying, Q., Li, J., and Kota, S. H.: Significant contributions of isoprene to summertime secondary organic aerosol in eastern United States, *Environ. Sci. Technol.*, 49, 7834–7842, doi:10.1021/acs.est.5b02514, 2015.
- You, Y. and Bertram, A. K.: Effects of molecular weight and temperature on liquid-liquid phase separation in particles containing organic species and inorganic salts, *Atmos. Chem. Phys.*, 15, 1351–1365, doi:10.5194/acp-15-1351-2015, 2015.
- 15 You, Y., Renbaum-Wolff, L., and Bertram, A. K.: Liquid-liquid phase separation in particles containing organics mixed with ammonium sulfate, ammonium bisulfate, ammonium nitrate or sodium chloride, *Atmos. Chem. Phys.*, 13, 11 723–11 734, doi:10.5194/acp-13-11723-2013, 2013.
- Yu, S., Bhawe, P. V., Dennis, R. L., and Mathur, R.: Seasonal and regional variations of primary and secondary organic aerosols over the continental United States: semi-empirical estimates and model evaluation, *Environ. Sci. Technol.*, 41, 4690–4697, doi:10.1021/es061535g, 2007.
- 20 Zelenyuk, A., Imre, D., and Cuadra-Rodriguez, L. A.: Evaporation of water from particles in the aerodynamic lens inlet: an experimental study, *Anal. Chem.*, 78, 6942–6947, doi:10.1021/ac061184o, 2006.
- Zhang, H., Surratt, J. D., Lin, Y. H., Bapat, J., and Kamens, R. M.: Effect of relative humidity on SOA formation from isoprene/NO photooxidation: enhancement of 2-methylglyceric acid and its corresponding oligoesters under dry conditions, *Atmos. Chem. Phys.*, 11, 6411–6424, doi:10.5194/acp-11-6411-2011, 2011.
- 25 Zuend, A. and Seinfeld, J. H.: Modeling the gas-particle partitioning of secondary organic aerosol: the importance of liquid-liquid phase separation, *Atmos. Chem. Phys.*, 12, 3857–3882, doi:10.5194/acp-12-3857-2012, 2012.
- Zuend, A., Marcolli, C., Luo, B. P., and Peter, T.: A thermodynamic model of mixed organic-inorganic aerosols to predict activity coefficients, *Atmos. Chem. Phys.*, 8, 4559–4593, doi:10.5194/acp-8-4559-2008, 2008.
- 30 Zuend, A., Marcolli, C., Peter, T., and Seinfeld, J. H.: Computation of liquid-liquid equilibria and phase stabilities: implications for RH-dependent gas/particle partitioning of organic-inorganic aerosols, *Atmos. Chem. Phys.*, 10, 7795–7820, doi:10.5194/acp-10-7795-2010, 2010.

**Table 1.** SOA and SVOC species in CMAQ v5.1-aero6i (Carlton et al., 2010; Pye and Pouliot, 2012; Pye et al., 2013, 2015). CMAQ model species names are generally preceded by the letter A to indicate aerosol. Semivolatile surrogates have a corresponding gas-phase species whose name is preceded by the letters SV.

| Species | <del>Production</del> <u>Species or production</u> pathway description           | Partitioning medium <u>in CMAQ v5.1</u>           |
|---------|----------------------------------------------------------------------------------|---------------------------------------------------|
| ALK1    | alkane + OH SOA/SVOC                                                             | Dry organic aerosol                               |
| ALK2    | alkane + OH SOA/SVOC                                                             | Dry organic aerosol                               |
| BNZ1    | benzene + OH high-NO <sub>x</sub> SOA/SVOC                                       | Dry organic aerosol                               |
| BNZ2    | benzene + OH high-NO <sub>x</sub> SOA/SVOC                                       | Dry organic aerosol                               |
| BNZ3    | benzene + OH low-NO <sub>x</sub> SOA                                             | Dry organic aerosol                               |
| DIM     | IEPOX-derived dimers                                                             | Aqueous aerosol                                   |
| GLY     | glyoxal + methylglyoxal SOA                                                      | Aqueous aerosol                                   |
| IEOS    | IEPOX-derived organosulfate                                                      | Aqueous aerosol                                   |
| IETET   | 2-methyltetrols                                                                  | Aqueous aerosol                                   |
| IMGA    | 2-methylglyceric acid                                                            | Aqueous aerosol                                   |
| IMOS    | MPAN-derived organosulfate                                                       | Aqueous aerosol                                   |
| ISO1    | isoprene+OH SOA/SVOC                                                             | Dry organic aerosol                               |
| ISO2    | isoprene+OH SOA/SVOC                                                             | Dry organic aerosol                               |
| ISO3    | acid-catalyzed isoprene SOA <sup>a</sup>                                         | Dry organic aerosol                               |
| ISOPNN  | isoprene dinitrate                                                               | Dry organic aerosol                               |
| MTHYD   | organic nitrate hydrolysis product                                               | Aqueous aerosol (from dry organic aerosol parent) |
| MTNO3   | monoterpene nitrate                                                              | Dry organic aerosol                               |
| OLGA    | oligomers from anthropogenic SOA/SVOCs                                           | Dry organic aerosol                               |
| OLGB    | oligomers from biogenic SOA/SVOCs                                                | Dry organic aerosol                               |
| ORGC    | glyoxal+methylglyoxal SOA                                                        | Cloud droplets                                    |
| PAH1    | naphthalene + OH high-NO <sub>x</sub> SOA/SVOC                                   | Dry organic aerosol                               |
| PAH2    | naphthalene + OH high-NO <sub>x</sub> SOA/SVOC                                   | Dry organic aerosol                               |
| PAH3    | naphthalene + OH low-NO <sub>x</sub> SOA                                         | Dry organic aerosol                               |
| SQT     | sesquiterpene + OH, O <sub>3</sub> , NO <sub>3</sub> , O <sub>3</sub> P SOA/SVOC | Dry organic aerosol                               |
| TOL1    | toluene + OH high-NO <sub>x</sub> SOA/SVOC                                       | Dry organic aerosol                               |
| TOL2    | toluene + OH high-NO <sub>x</sub> SOA/SVOC                                       | Dry organic aerosol                               |
| TOL3    | toluene + OH low-NO <sub>x</sub> SOA                                             | Dry organic aerosol                               |
| TRP1    | monoterpene + OH, O <sub>3</sub> , O <sub>3</sub> P SOA/SVOC                     | Dry organic aerosol                               |
| TRP2    | monoterpene + OH, O <sub>3</sub> , O <sub>3</sub> P SOA/SVOC                     | Dry organic aerosol                               |
| XYL1    | xylene + OH high-NO <sub>x</sub> SOA/SVOC                                        | Dry organic aerosol                               |
| XYL2    | xylene + OH high-NO <sub>x</sub> SOA/SVOC                                        | Dry organic aerosol                               |
| XYL3    | xylene + OH low-NO <sub>x</sub> SOA                                              | Dry organic aerosol                               |

<sup>a</sup> AISO3 contains the sum of 2-methyltetrols and IEPOX-derived organosulfates in CMAQv5.1-aero6. It is not used in aero6i as those species are represented individually. Prior to v5.1, AISO3 was determined as an enhancement over AISO1+AISO2 based on [H<sup>+</sup>] (Carlton et al., 2010).

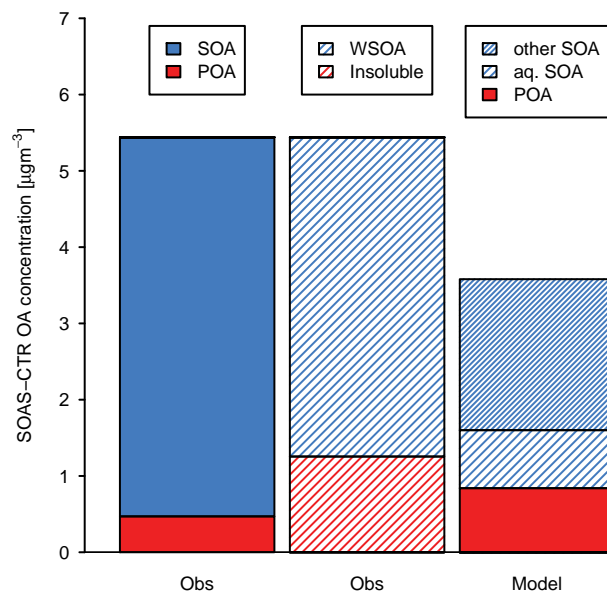

**Figure 1.** Contribution of POA (observed biomass burning OA, BBOA, Xu et al. (2015a)), SOA, water-soluble OA (estimated as  $2.1 \times$  WSOC from the PiLS, Sullivan et al. (2004)), and aqueous (aq.) SOA (model only) to total OA during June 2013 observed at CTR during SOAS and modeled by standard CMAQ. Insoluble OA is the difference between measured total OA and water-soluble OA. Modeled “other SOA” is formed via partitioning to a dry organic phase.

**Table 2.** *A priori* SOA and SVOC properties: saturation concentration of pure species ( $C_0^*$ ), mass-based stoichiometric yield from parent hydrocarbon reaction ( $\alpha$ ), organic matter to organic carbon ratio (OM/OC), molecular weight ( $\widetilde{M}$ ), number of carbons per molecule ( $n_C$ ), Henry’s law coefficient ( $H$ ), diffusivity in the gas phase ( $D_g$ ), LeBas molar volume ( $V_{LeBas}$ ), hygroscopicity parameter ( $\kappa$ ), density ( $\rho$ ), activity coefficient at infinite dilution ( $\gamma^\infty$ ), solubility (S), and saturation concentration at infinite dilution in water ( $C_H^*$ ). All temperature dependent parameters given at 298 K.

| Species | $C_0^*$<br>$\mu\text{gm}^{-3}$ | $\alpha$<br>$\text{gg}^{-1}$ | OM/OC<br>$\text{gg}^{-1}$ | $\widetilde{M}$<br>$\text{gmol}^{-1}$ | $n_C$ | H<br>$\text{Matm}^{-1}$       | $D_g$<br>$\text{cm}^2\text{s}^{-1}$ | $V_{LeBas}$<br>$\text{cm}^3\text{mol}^{-1}$ | $\kappa$ | $\rho$<br>$\text{kgm}^{-3}$ | $\gamma^{\infty,\text{f}}$ | S<br>$\text{gL}^{-1}$ | $C_H^*$ <sup>f</sup><br>$\mu\text{gm}^{-3}$ |
|---------|--------------------------------|------------------------------|---------------------------|---------------------------------------|-------|-------------------------------|-------------------------------------|---------------------------------------------|----------|-----------------------------|----------------------------|-----------------------|---------------------------------------------|
| ALK1    | 0.1472 <sup>a</sup>            | 0.0334                       | 1.56                      | 225                                   | 12    | $6.2 \times 10^8$             | 0.0514                              | 280.5                                       | 0.07     | 1400                        | 5600                       | 2                     | $8.3 \times 10^2$                           |
| ALK2    | 51.8775 <sup>a</sup>           | 0.2164                       | 1.42                      | 205.1                                 | 12    | $4.5 \times 10^6$             | 0.0546                              | 275.6                                       | 0.06     | 1400                        | 2000                       | 6                     | $1.0 \times 10^5$                           |
| BNZ1    | 0.302 <sup>b</sup>             | 0.0720                       | 2.68 <sup>c</sup>         | 161                                   | 5     | $2.1 \times 10^8$             | 0.0642                              | 134.1                                       | 0.19     | 1400                        | 5800                       | 2                     | $1.7 \times 10^3$                           |
| BNZ2    | 111.11 <sup>b</sup>            | 0.8880                       | 2.23 <sup>c</sup>         | 134                                   | 5     | $2.0 \times 10^6$             | 0.0726                              | 127.5                                       | 0.15     | 1400                        | 1400                       | 5                     | $1.5 \times 10^5$                           |
| BNZ3    | NA                             | 0.370                        | 3.00 <sup>c</sup>         | 180                                   | 5     | NA                            | NA                                  | NA                                          | 0.23     | 1400                        | NA                         | <1                    | NA                                          |
| DIM     | NA                             | NA                           | 2.07 <sup>d</sup>         | 248.2                                 | 10    | NA                            | NA                                  | NA                                          | 0.13     | 1400                        | NA                         | NA                    | NA                                          |
| GLY     | NA                             | NA                           | 2.13 <sup>e</sup>         | 66.4                                  | 3     | NA                            | NA                                  | NA                                          | 0.13     | 1400                        | NA                         | NA                    | NA                                          |
| IEOS    | NA                             | NA                           | 3.60 <sup>d</sup>         | 216.2                                 | 5     | NA                            | NA                                  | NA                                          | 0.30     | 1400                        | NA                         | NA                    | NA                                          |
| IETET   | NA                             | NA                           | 2.27 <sup>d</sup>         | 136.2                                 | 5     | NA                            | NA                                  | NA                                          | 0.15     | 1400                        | NA                         | NA                    | NA                                          |
| IMGA    | NA                             | NA                           | 2.50 <sup>d</sup>         | 120.1                                 | 4     | NA                            | NA                                  | NA                                          | 0.18     | 1400                        | NA                         | NA                    | NA                                          |
| IMOS    | NA                             | NA                           | 4.17 <sup>d</sup>         | 200.2                                 | 4     | NA                            | NA                                  | NA                                          | 0.36     | 1400                        | NA                         | NA                    | NA                                          |
| ISO1    | 116.01 <sup>b</sup>            | 0.2320                       | 2.20 <sup>c</sup>         | 132                                   | 5     | $4.3 \times 10^7$             | 0.0733                              | 126.3                                       | 0.14     | 1400                        | 60                         | 120                   | $6.9 \times 10^3$                           |
| ISO2    | 0.617 <sup>b</sup>             | 0.0288                       | 2.23 <sup>c</sup>         | 133                                   | 5     | $3.7 \times 10^9$             | 0.0729                              | 123.8                                       | 0.15     | 1400                        | 130                        | 56                    | $8.2 \times 10^1$                           |
| ISO3    | NA                             | NA                           | 2.80 <sup>d</sup>         | 168.2                                 | 5     | NA                            | NA                                  | NA                                          | 0.21     | 1400                        | NA                         | NA                    | NA                                          |
| ISOPNN  | 8.9 <sup>e</sup>               | NA                           | 3.80 <sup>e</sup>         | 226                                   | 5     | $4.5 \times 10^{8\text{e}}$   | 0.0457 <sup>e</sup>                 | 206.8 <sup>e</sup>                          | 0.32     | 1400                        | 130                        | 98                    | $1.1 \times 10^3$                           |
| MTHYD   | NA                             | NA                           | 1.54 <sup>e</sup>         | 185                                   | 10    | NA                            | NA                                  | NA                                          | 0.07     | 1400                        | NA                         | NA                    | NA                                          |
| MTNO3   | 12 <sup>e</sup>                | NA                           | 1.90 <sup>e</sup>         | 231                                   | 10    | $1.5 \times 10^{6\text{e,f}}$ | 0.0453 <sup>e</sup>                 | 251.2 <sup>e</sup>                          | 0.11     | 1400                        | 29000                      | 0.4                   | $3.5 \times 10^5$                           |
| OLGA    | NA                             | NA                           | 2.50 <sup>c</sup>         | 206                                   | 7     | NA                            | NA                                  | NA                                          | 0.18     | 1400                        | NA                         | <1                    | NA                                          |
| OLGB    | NA                             | NA                           | 2.10 <sup>c</sup>         | 248                                   | 10    | NA                            | NA                                  | NA                                          | 0.13     | 1400                        | NA                         | >10                   | NA                                          |
| ORGC    | NA                             | NA                           | 2.00 <sup>b</sup>         | 177                                   | 7     | NA                            | NA                                  | NA                                          | 0.12     | 1400                        | NA                         | NA                    | NA                                          |
| PAH1    | 1.6598 <sup>a</sup>            | 0.2100                       | 1.63                      | 195.6                                 | 10    | $5.1 \times 10^7$             | 0.0564                              | 235.7                                       | 0.08     | 1480                        | 5300                       | 2                     | $8.8 \times 10^3$                           |
| PAH2    | 264.6675 <sup>a</sup>          | 1.0700                       | 1.49                      | 178.7                                 | 10    | $7.2 \times 10^5$             | 0.0599                              | 231.5                                       | 0.06     | 1480                        | 2100                       | 5                     | $5.7 \times 10^5$                           |
| PAH3    | NA <sup>a</sup>                | 0.7300                       | 1.77                      | 212.2                                 | 10    | NA                            | NA                                  | NA                                          | 0.09     | 1550                        | NA                         | <1                    | NA                                          |
| SQT     | 24.984 <sup>b</sup>            | 1.5370                       | 1.52 <sup>c</sup>         | 273                                   | 15    | $6.2 \times 10^8$             | 0.0451                              | 346.5                                       | 0.07     | 1400                        | 40                         | 380                   | $1.0 \times 10^3$                           |
| TOL1    | 2.326 <sup>b</sup>             | 0.0580                       | 2.26 <sup>c</sup>         | 163                                   | 6     | $4.2 \times 10^7$             | 0.0637                              | 153.7                                       | 0.15     | 1240                        | 3800                       | 2                     | $8.9 \times 10^3$                           |
| TOL2    | 21.277 <sup>b</sup>            | 0.1130                       | 1.82 <sup>c</sup>         | 175                                   | 8     | $7.3 \times 10^6$             | 0.0607                              | 194.1                                       | 0.10     | 1240                        | 2600                       | 4                     | $5.5 \times 10^4$                           |
| TOL3    | NA                             | 0.300                        | 2.70 <sup>c</sup>         | 194                                   | 6     | NA                            | NA                                  | NA                                          | 0.20     | 1450                        | NA                         | <1                    | NA                                          |
| TRP1    | 14.792 <sup>b</sup>            | 0.1393                       | 1.84 <sup>c</sup>         | 177                                   | 8     | $9.9 \times 10^8$             | 0.0603                              | 194.9                                       | 0.10     | 1400                        | 27                         | 360                   | $4.0 \times 10^2$                           |
| TRP2    | 133.7297 <sup>b</sup>          | 0.4542                       | 1.83 <sup>c</sup>         | 198                                   | 9     | $1.4 \times 10^8$             | 0.0559                              | 218.8                                       | 0.10     | 1400                        | 25                         | 450                   | $3.3 \times 10^3$                           |
| XYL1    | 1.314 <sup>b</sup>             | 0.0310                       | 2.42 <sup>c</sup>         | 174                                   | 6     | $6.2 \times 10^7$             | 0.061                               | 154.6                                       | 0.17     | 1480                        | 4900                       | 2                     | $6.4 \times 10^3$                           |
| XYL2    | 34.483 <sup>b</sup>            | 0.0900                       | 1.93 <sup>c</sup>         | 185                                   | 8     | $4.0 \times 10^6$             | 0.0585                              | 194.6                                       | 0.11     | 1480                        | 3100                       | 3                     | $1.1 \times 10^5$                           |
| XYL3    | NA                             | 0.360                        | 2.30 <sup>c</sup>         | 218                                   | 8     | NA                            | NA                                  | NA                                          | 0.15     | 1330                        | NA                         | <1                    | NA                                          |

<sup>a</sup>Pye and Pouliot (2012). <sup>b</sup>Carlton et al. (2010). <sup>c</sup>Pankow et al. (2015). <sup>d</sup>Pye et al. (2013). <sup>e</sup>Pye et al. (2015). <sup>f</sup>A factor of 100 increase in MTNO3 Henry’s law coefficient, factor of 10 decrease in  $\gamma^\infty$ , and factor of 10 decrease in  $C_{xw=1}^*$  produced better model results in the  $\gamma \neq 1$  simulation. See supporting information for *a posteriori*  $\gamma \neq 1$  simulation parameters. NA indicates not applicable (nonvolatile species).

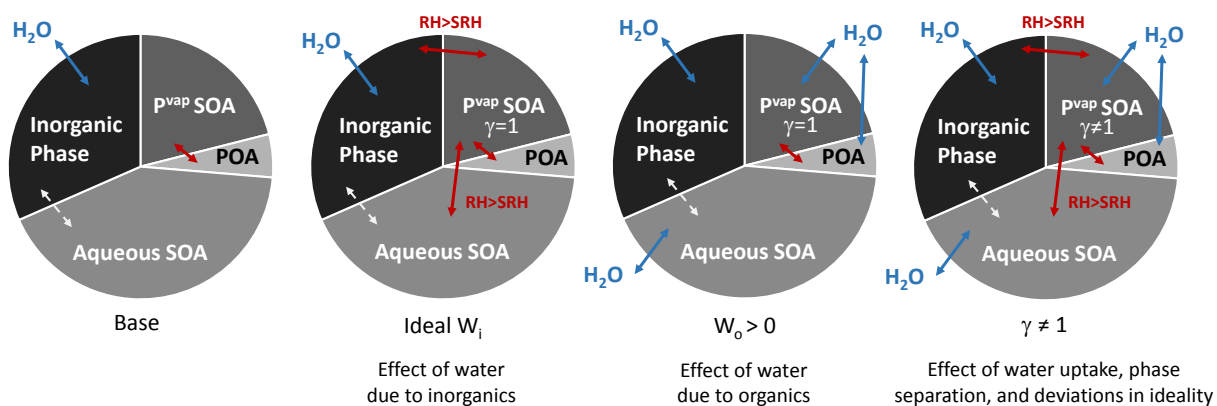

**Figure 2.** Interactions of the inorganic phase (e.g. sulfate, nitrate, ammonium, aerosol water), aqueous SOA, vapor-pressure driven SOA, and POA in the base and sensitivity simulations. Blue arrows depict water partitioning/uptake. Red arrows indicate semivolatile partitioning interactions [via modified Raoult's law](#). The white dashed arrows indicate aqueous SOA interaction with the inorganic phase (via liquid water, acidity, [ete](#) and [particle size](#)).

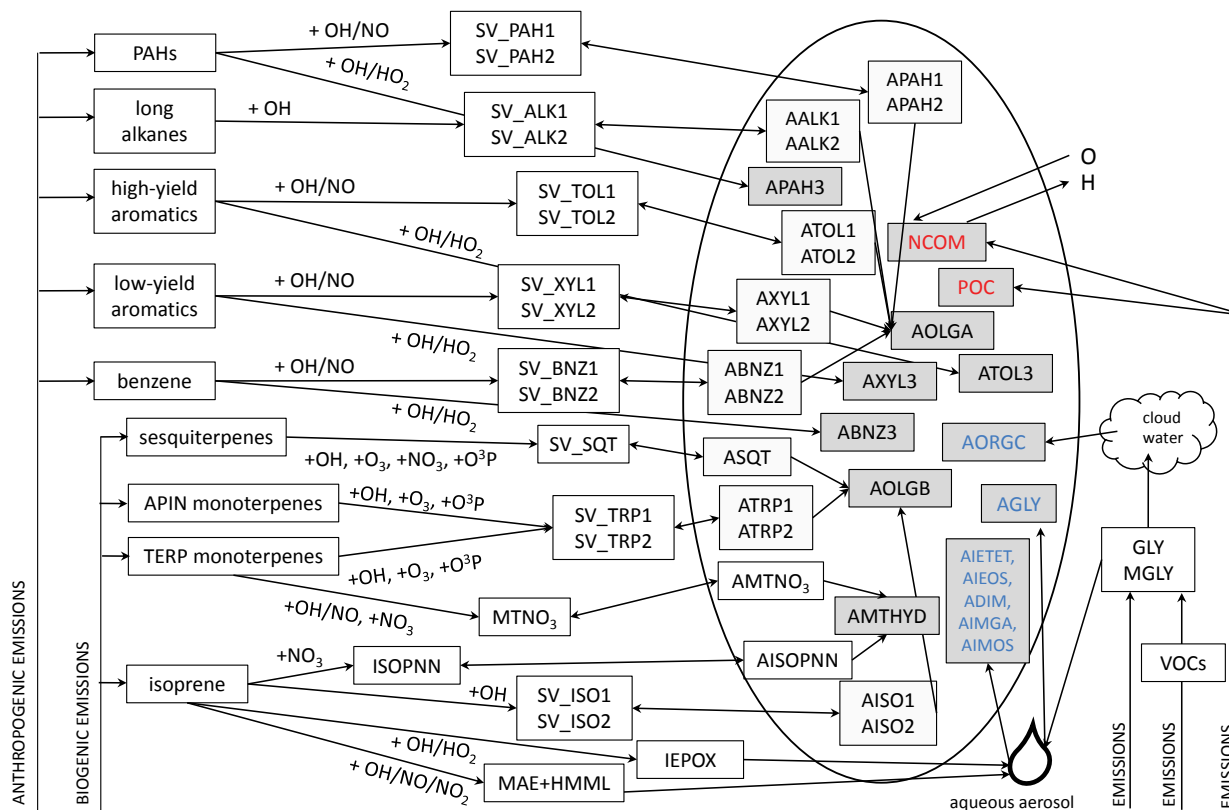

**Figure 3.** Schematic of SOA treatment in current CMAQ-aero6i. Species are described in Table 1. Species in grey boxes are nonvolatile. Species with names in red make up POA (i.e.  $POA = POC + NCOM$ ). Species with names in blue form in the model as a direct result of interactions with water.

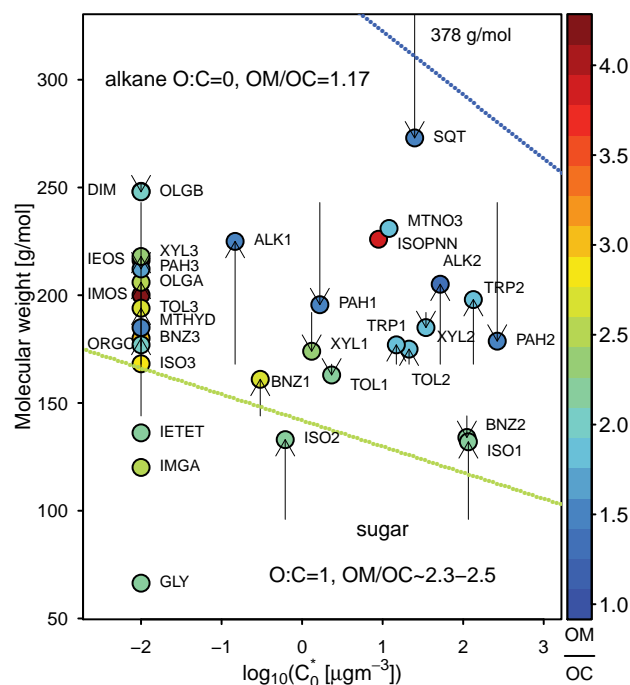

**Figure 4.** The volatility, molecular weight, and OM/OC of SOA species in CMAQ. Nonvolatile species are arbitrarily plotted at a saturation concentration of  $0.01 \mu\text{gm}^{-3}$ . The arrows start at the old molecular weights assumed in ~~CMAQ v5~~CMAQ v5.1. The arrows end at the new (CMAQ v5.2) molecular weights in Table 2. Lines indicate the properties of alkanes and sugars. The molecular weight of ASQT in CMAQ v5.1 is off the scale at 378 g/mol.

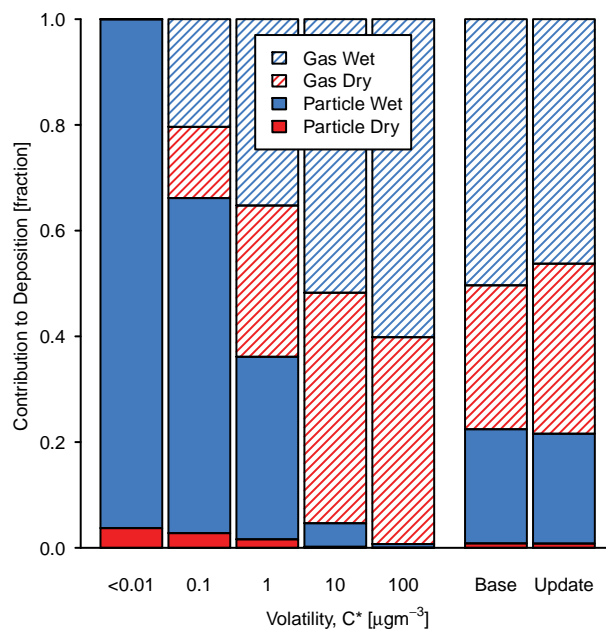

**Figure 5.** Contribution of wet (blue) and dry (red) deposition of gas (striped) and particle (solid) SVOCs binned by volatility and overall compared to the base simulation (CMAQ v5.1). Nonvolatile species are indicated by  $C^* < 0.01 \mu\text{gm}^{-3}$ . POA is not included.

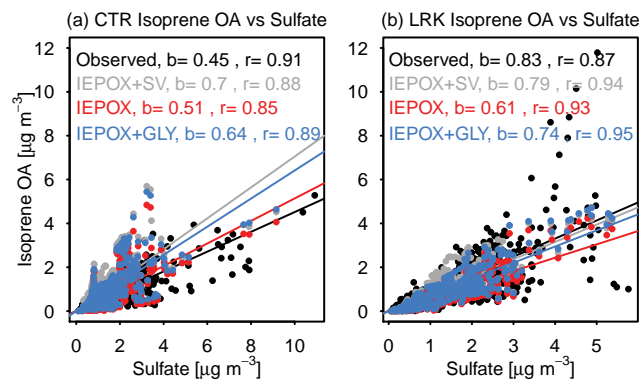

**Figure 6.** Isoprene OA vs sulfate at (a) CTR and (b) LRK and the slope (b, forced through 0) and correlation coefficient (r) for each data set. Model representations of isoprene OA include SOA from IEPOX uptake and semivolatile isoprene+OH SOA (IEPOX+SV), SOA from IEPOX uptake (IEPOX), and SOA from IEPOX and glyoxal uptake (IEPOX+GLY).



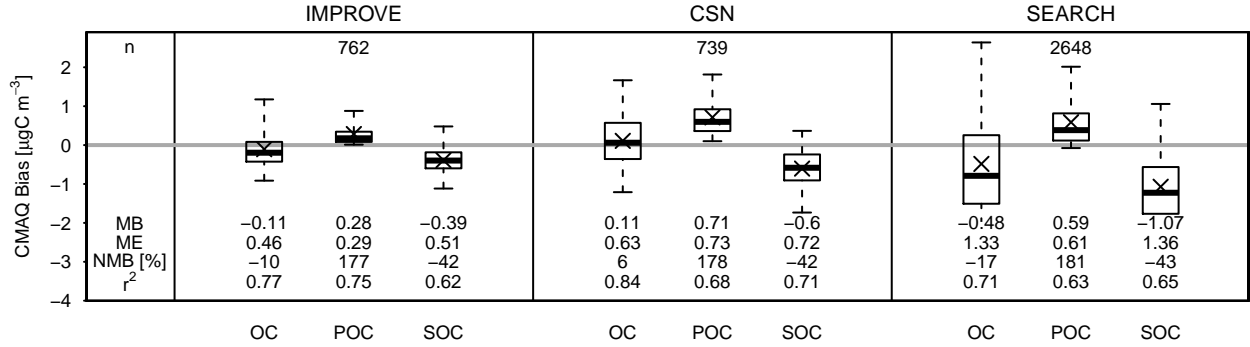

**Figure 7.** Aerosol OC, POC, and SOC predicted by the base model simulation ( $M_i$ ) compared to CSN, IMPROVE, and SEARCH (JST, BHM, CTR, and YRK) observations ( $O_i$ ). Mean bias ( $\text{MB} = \frac{1}{n} \sum_{i=1}^n (M_i - O_i)$ ) and mean absolute gross error ( $\text{ME} = \frac{1}{n} \sum_{i=1}^n |M_i - O_i|$ ) are in  $\mu\text{gCm}^{-3}$ . X symbols indicate mean bias. Boxplots indicate 5th, 25th, median, 75th, and 95th percentile.  $r^2$  based on a zero intercept.  $n$  is the number of observations.  $\text{NMB} = \frac{\sum_{i=1}^n (M_i - O_i)}{\sum_{i=1}^n O_i}$

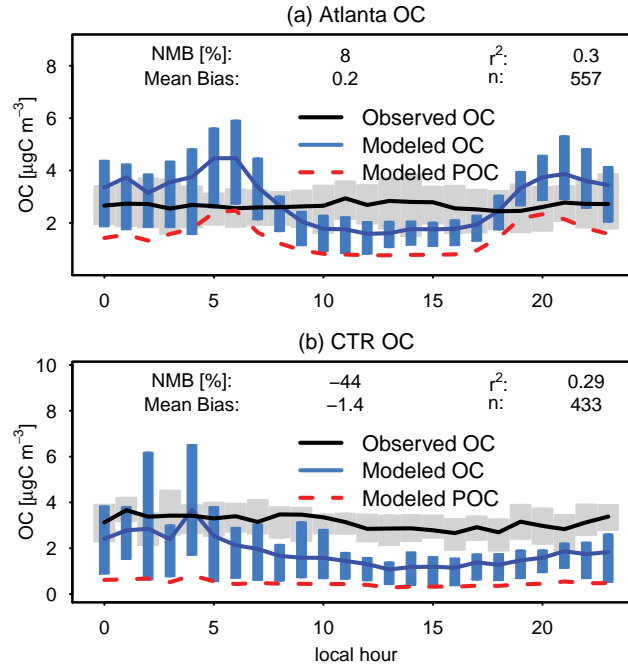

**Figure 8.** OC as a function of hour of the day for a SEARCH urban (Atlanta, JST) and rural (CTR) site during June 2013. Bars/shading indicate 25th to 75th percentiles. Lines indicate means. Red dashed lines indicate model-predicted POC.

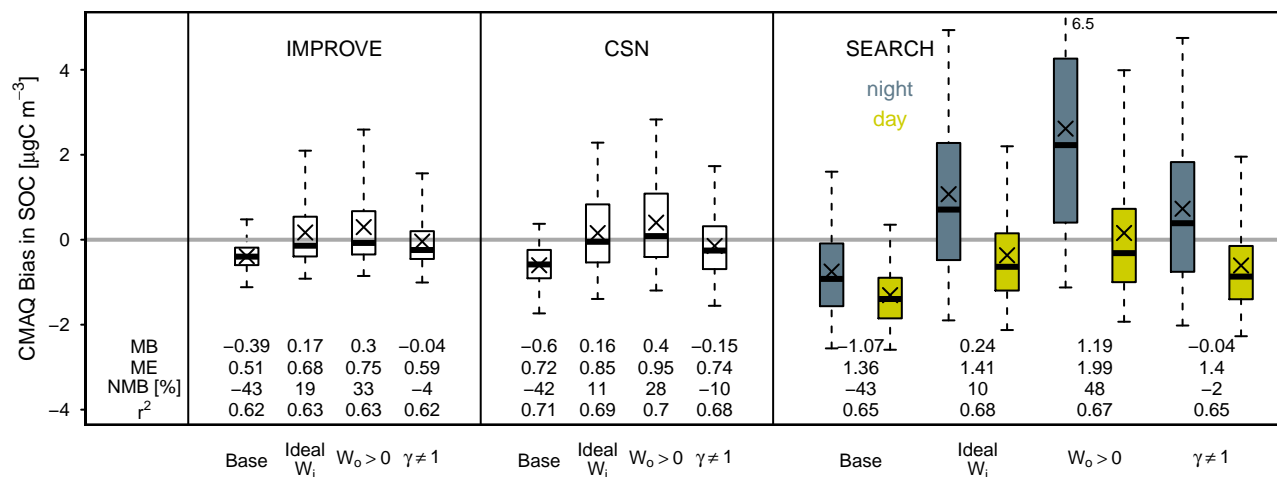

**Figure 9.** Bias (model-observation) in SOC for IMPROVE, CSN, and SEARCH networks. SEARCH data is divided into daytime (6:00 am to 7:59 pm local time) and nighttime observations. SOC is calculated using OC/EC ratios and estimating evaporation of semivolatiles as described in section 2.9. X symbols indicate mean bias. Boxplots indicate 5th, 25th, median, 75th, and 95th percentile.  $r^2$  based on a zero intercept.

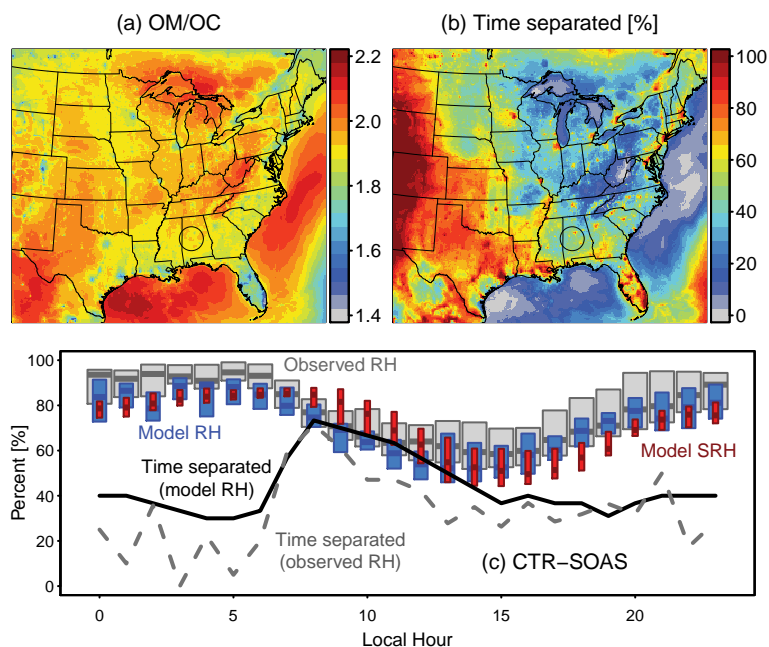

**Figure 10.** June 2013 mean predicted (a) OM/OC, (b) percentage of time spent separated into organic-rich and inorganic-rich phases, and (c) conditions at CTR-SOAS for the **LLPS-ideal**  $W_i$  simulation. Separation occurs when  $RH < SRH$ . Observed RH at SOAS is from the SEARCH network. Panel (c) includes a prediction of time separated using model predicted RH (solid) and observed RH (dashed).

# CTR during SOAS, June 2013

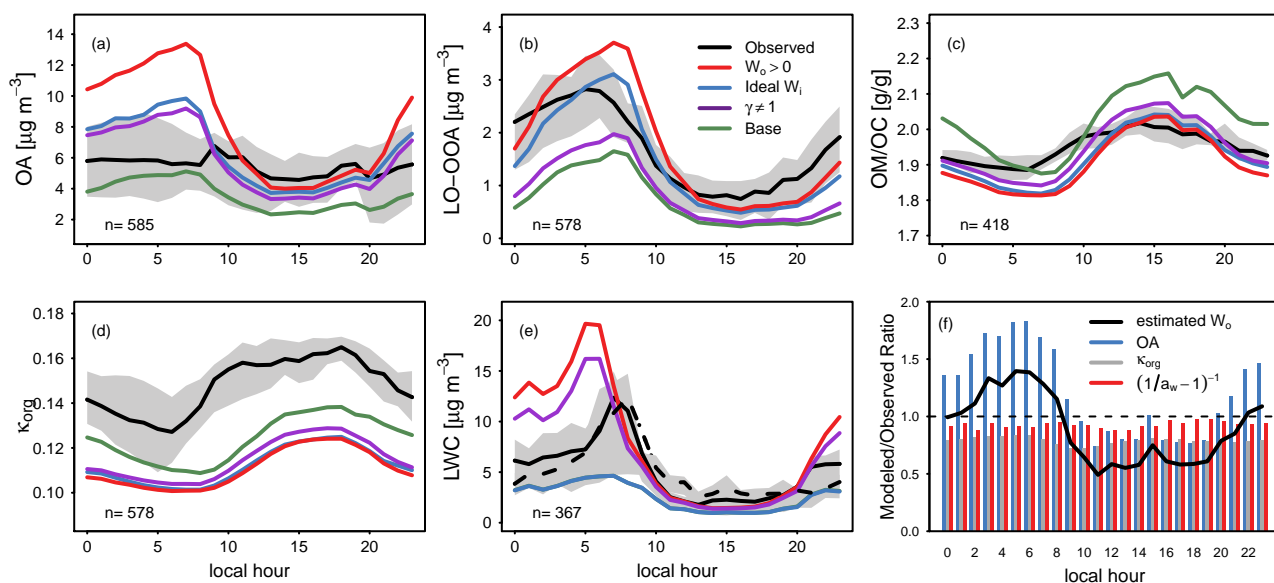

**Figure 11.** Observed and predicted concentration of (a) organic aerosol (Xu et al., 2015a), (b) AMS LO-OOA factor (Xu et al., 2015a) and model predicted organic nitrate-derived SOA, (c) OM/OC (Hu et al., 2015), (d)  $\kappa_{org}$ , (e) aerosol liquid water measured by nephelometer and the Georgia Tech group (solid black) (Guo et al., 2015) and measured by particle growth and the Rutgers/NC State group (dashed black) (Nguyen et al., 2014b), and (f) ratio of predicted to observed quantities influencing organic water ( $W_o$ ) at CTR (for the  $\gamma \neq 1$  simulation only). Observed  $\kappa_{org}$  is determined by applying a  $\kappa_{org,i}$  value of 0.31, 0.20, 0.16, and 0.08 to observed BBOA, ISOPOA, MO-OOA, and LO-OOA respectively (Cerully et al., 2015)). Grey shading represents the interquartile range of the observed data (mean in black). Colors represent different simulations in a-e and different quantities in f.

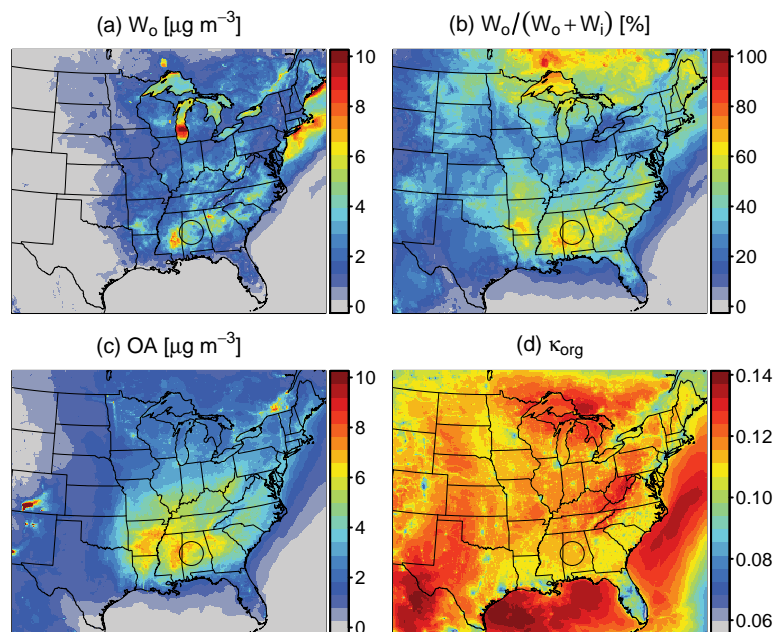

**Figure 12.** June 2013 mean predicted (a) aerosol water due to organic species, (b) contribution of organic water to total aerosol water, (c) total organic aerosol, and (d) hygroscopicity parameter for the  $\gamma \neq 1$  simulation.

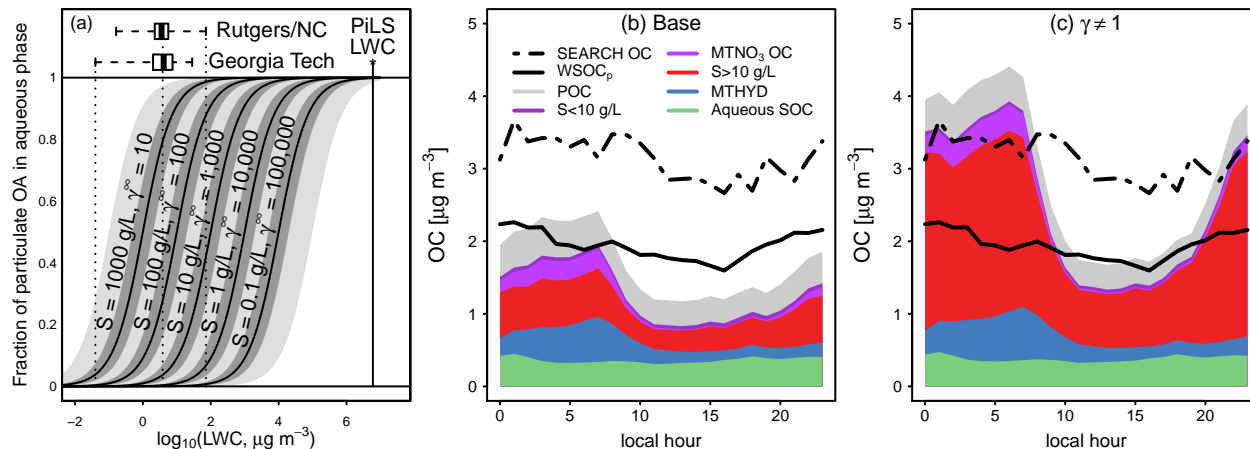

**Figure 13.** Fraction of OA present in aqueous phase (a) as a function of activity coefficient at infinite dilution and observed OC and WSOC<sub>p</sub> at CTR compared to model predictions (b-c). Panel (a) boxplots indicate observed LWC from Rutgers/NC State (Nguyen et al., 2014b) and Georgia Tech (Guo et al., 2015) during SOAS. For predictions (a), WIOA is  $1 \mu\text{g m}^{-3}$  and the species molecular weight is set to  $180 \text{ g/mol}$ . Predictions in dark grey shading span a factor of 2 in WIOA ( $0.5$  to  $2 \mu\text{g m}^{-3}$ ). Predictions in light grey shading (a) indicate a factor of 10 in WIOA ( $0.1$  to  $10 \mu\text{g m}^{-3}$ ). Panel (b) corresponds to model predictions in the base simulation while panel (c) corresponds to predictions in the  $\gamma \neq 1$  simulation. Model predictions of OC are stacked and divided into POC, compounds with  $\gamma_i^\infty > 1,000$  (solubilities less than  $10 \text{ g/L}$ , Table 2), monoterpene nitrate OC, compounds with  $\gamma_i^\infty < 1,000$  (solubilities greater than  $10 \text{ g/L}$ ), the organic nitrate hydrolysis product, and aqueous SOC.

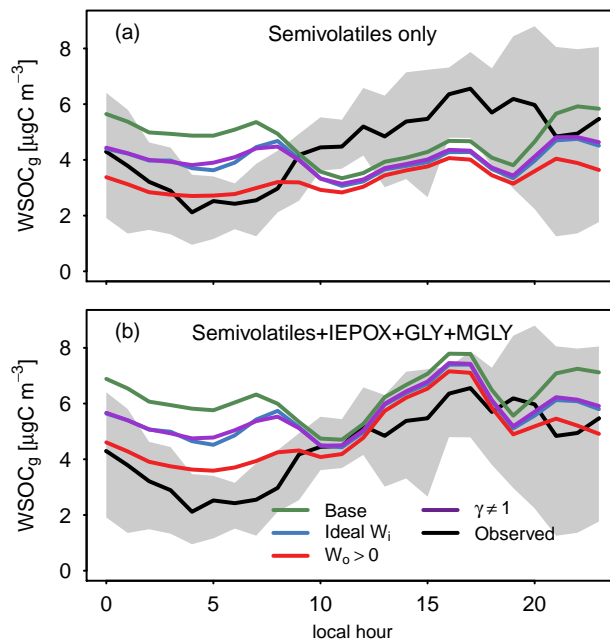

**Figure 14.** Observed WSOC<sub>g</sub> (Hennigan et al., 2009; Xu et al., in preparation) and model SOA precursors considering only semivolatile surrogates (a) and semivolatile and aqueous surrogates (b). Grey shading represents the interquartile range of the observed data (mean in black). Colors represent different simulations.
